# Supplementary material
Source: PubMed Central journal article supplement (PMC5863921)

## SUPPORTING INFORMATION FOR

The potential of achiral sponge-derived and synthetic bromoindoles as selective cytotoxins against PANC-1 tumor cells

Nicholas Lorig-Roach, † Frances Hamkins-Indik, † Tyler A. Johnson, † Karen Tenney, † Frederick A. Valeriote§, and Phillip Crews\*, †

†Department of Chemistry and Biochemistry, University of California, Santa Cruz, CA, 95064, United States

§Department of Internal Medicine, Division of Hematology and Oncology, Henry Ford Hospital, Detroit Michigan 48202, United States

\*To whom correspondence should be addressed: Tel: (831) 459-2603. Fax : (831) 459-2935. Email: [pcrews@ucsc.edu](mailto:pcrews@ucsc.edu)

|                                                                                                                                                                | Page Number |
|----------------------------------------------------------------------------------------------------------------------------------------------------------------|-------------|
| <b>Figure S1.</b> <sup>1</sup> H NMR spectrum of <b>(2)</b> , (600 MHz, DMSO-d <sub>6</sub> )                                                                  | 3           |
| <b>Figure S2.</b> <sup>13</sup> C NMR spectrum of <b>(2)</b> , (150 MHz, DMSO-d <sub>6</sub> )                                                                 | 4           |
| <b>Figure S3.</b> gHSQC NMR spectrum of <b>(2)</b> , (600 MHz, DMSO-d <sub>6</sub> )                                                                           | 5           |
| <b>Figure S4.</b> gHMBCAD NMR spectrum of <b>(2)</b> , (600 MHz, DMSO-d <sub>6</sub> )                                                                         | 6           |
| <b>Figure S5.</b> <sup>1</sup> H spectrum of <b>(2a)</b> (600 MHz-DMSO-d <sub>6</sub> )                                                                        | 7           |
| <b>Figure S6.</b> <sup>13</sup> C spectrum of <b>(2a)</b> (150 MHz)                                                                                            | 8           |
| <b>Figure S7.</b> <sup>1</sup> H spectrum of <b>(3)</b> (600 MHz, DMSO-d <sub>6</sub> )                                                                        | 9           |
| <b>Figure S8.</b> <sup>13</sup> C spectrum of <b>(3)</b> (150 MHz, DMSO-d <sub>6</sub> )                                                                       | 10          |
| <b>Figure S9.</b> Stacked <sup>1</sup> H NMR spectra of the natural product <b>(2)</b> and synthetic <b>2a</b> and <b>3</b> ; (600MHz, DMSO-d <sub>6</sub> )   | 11          |
| <b>Figure S10.</b> Stacked <sup>13</sup> C NMR spectra of the natural product <b>(2)</b> and synthetic <b>2a</b> and <b>3</b> ; (150MHz, DMSO-d <sub>6</sub> ) | 12          |
| <b>Figure S11.</b> <sup>1</sup> H spectrum of 5uL formic acid (600 MHz, DMSO-d <sub>6</sub> )                                                                  | 13          |
| <b>Figure S12.</b> <sup>13</sup> C spectrum of 5uL formic acid (150 MHz)                                                                                       | 14          |
| <b>Figure S13.</b> <sup>1</sup> H spectrum of <b>(7)</b> (600 MHz, DMSO-d <sub>6</sub> )                                                                       | 15          |
| <b>Figure S14.</b> <sup>13</sup> C spectrum of <b>(7)</b> (150 MHz, DMSO-d <sub>6</sub> )                                                                      | 16          |
| <b>Figure S15.</b> <sup>1</sup> H spectrum of 6-bromo-1H-indol-3-carbonyl cyanide <b>(9)</b> in (600 MHz, DMSO-d <sub>6</sub> ).                               | 17          |
| <b>Figure S16.</b> <sup>13</sup> C spectrum of 6-bromo-1H-indol-3-carbonyl cyanide <b>(9)</b> in (150 MHz, DMSO-d <sub>6</sub> ).                              | 18          |
| <b>Figure S17.</b> <sup>1</sup> H spectrum of <b>(10)</b> (600 MHz, DMSO-d <sub>6</sub> )                                                                      | 19          |
| <b>Figure S18.</b> <sup>13</sup> C spectrum of <b>(10)</b> (150 MHz, DMSO-d <sub>6</sub> )                                                                     | 20          |
| <b>Figure S19.</b> <sup>1</sup> H spectrum of <b>(11)</b> (500 MHz, DMSO-d <sub>6</sub> )                                                                      | 21          |
| <b>Figure S20.</b> <sup>13</sup> C spectrum of <b>(11)</b> (125 MHz, DMSO-d <sub>6</sub> )                                                                     | 22          |
| <b>Figure S21.</b> <sup>1</sup> H spectrum of <b>(12)</b> (500 MHz, DMSO-d <sub>6</sub> )                                                                      | 23          |
| <b>Figure S22.</b> <sup>13</sup> C spectrum of <b>(12)</b> (125 MHz, DMSO-d <sub>6</sub> )                                                                     | 24          |
| <b>Figure S23.</b> <sup>1</sup> H spectrum of <b>(13)</b> (600 MHz, DMSO-d <sub>6</sub> )                                                                      | 25          |
| <b>Figure S24.</b> <sup>13</sup> C spectrum of <b>(13)</b> (150 MHz, DMSO-d <sub>6</sub> )                                                                     | 26          |
| <b>Figure S25.</b> <sup>1</sup> H spectrum of <b>(14)</b> (600 MHz, DMSO-d <sub>6</sub> )                                                                      | 27          |
| <b>Figure S26.</b> gHMBCAD spectrum of <b>(14)</b> (600 MHz, DMSO-d <sub>6</sub> )                                                                             | 28          |
| <b>Figure S27.</b> gHMBCAD spectrum expansion of <b>(14)</b> (600 MHz, DMSI-d <sub>6</sub> )                                                                   | 29          |
| <b>Figure S28.</b> <sup>1</sup> H spectrum of <b>(15)</b> (600 MHz, DMSO-d <sub>6</sub> )                                                                      | 30          |
| <b>Figure S29.</b> gHMBCAD spectrum of <b>(15)</b> (600 MHz, DMSO-d <sub>6</sub> )                                                                             | 31          |
| <b>Figure S30.</b> gHMBCAD spectrum expansion of <b>(15)</b> (600 MHz, DMSI-d <sub>6</sub> )                                                                   | 32          |
| <b>Figure S31.</b> <sup>1</sup> H spectrum of <b>(16)</b> (600 MHz, DMSO-d <sub>6</sub> )                                                                      | 33          |
| <b>Figure S32.</b> gHMBCAD spectrum of <b>(16)</b> (600 MHz, DMSO-d <sub>6</sub> )                                                                             | 34          |
| <b>Figure S33.</b> gHMBCAD spectrum expansion of <b>(16)</b> (600 MHz, DMSI-d <sub>6</sub> )                                                                   | 35          |

|                                                                                                                                            |    |
|--------------------------------------------------------------------------------------------------------------------------------------------|----|
| <b>Figure S34.</b> $^1\text{H}$ spectrum (600 MHz) of 6-bromo-1H-indol-3-yl-carboxaldehyde ( <b>5</b> ) in DMSO-d <sub>6</sub> .           | 36 |
| <b>Figure S35.</b> $^1\text{H}$ spectrum expansion (600 MHz) of 6-bromo-1H-indol-3-yl-carboxaldehyde ( <b>5</b> ) in DMSO-d <sub>6</sub> . | 37 |
| <b>Figure S36.</b> $^{13}\text{C}$ spectrum (150 MHz) of 6-bromo-1H-indol-3-yl-carboxaldehyde ( <b>5</b> ) in DMSO-d <sub>6</sub> .        | 38 |
| <b>Figure S37.</b> gHSQCAD spectrum (600 MHz) of ( <b>5</b> ) in DMSO-d <sub>6</sub> .                                                     | 39 |
| <b>Figure S38.</b> NOESY spectrum (600 MHz, 600ms mixing time) of ( <b>5</b> ) in DMSO-d <sub>6</sub> .                                    | 40 |

Figure S1.  $^1\text{H}$  NMR spectrum (600 MHz) of 6-Br-8-keto-conicamin A (**2**) in DMSO- $d_6$ .

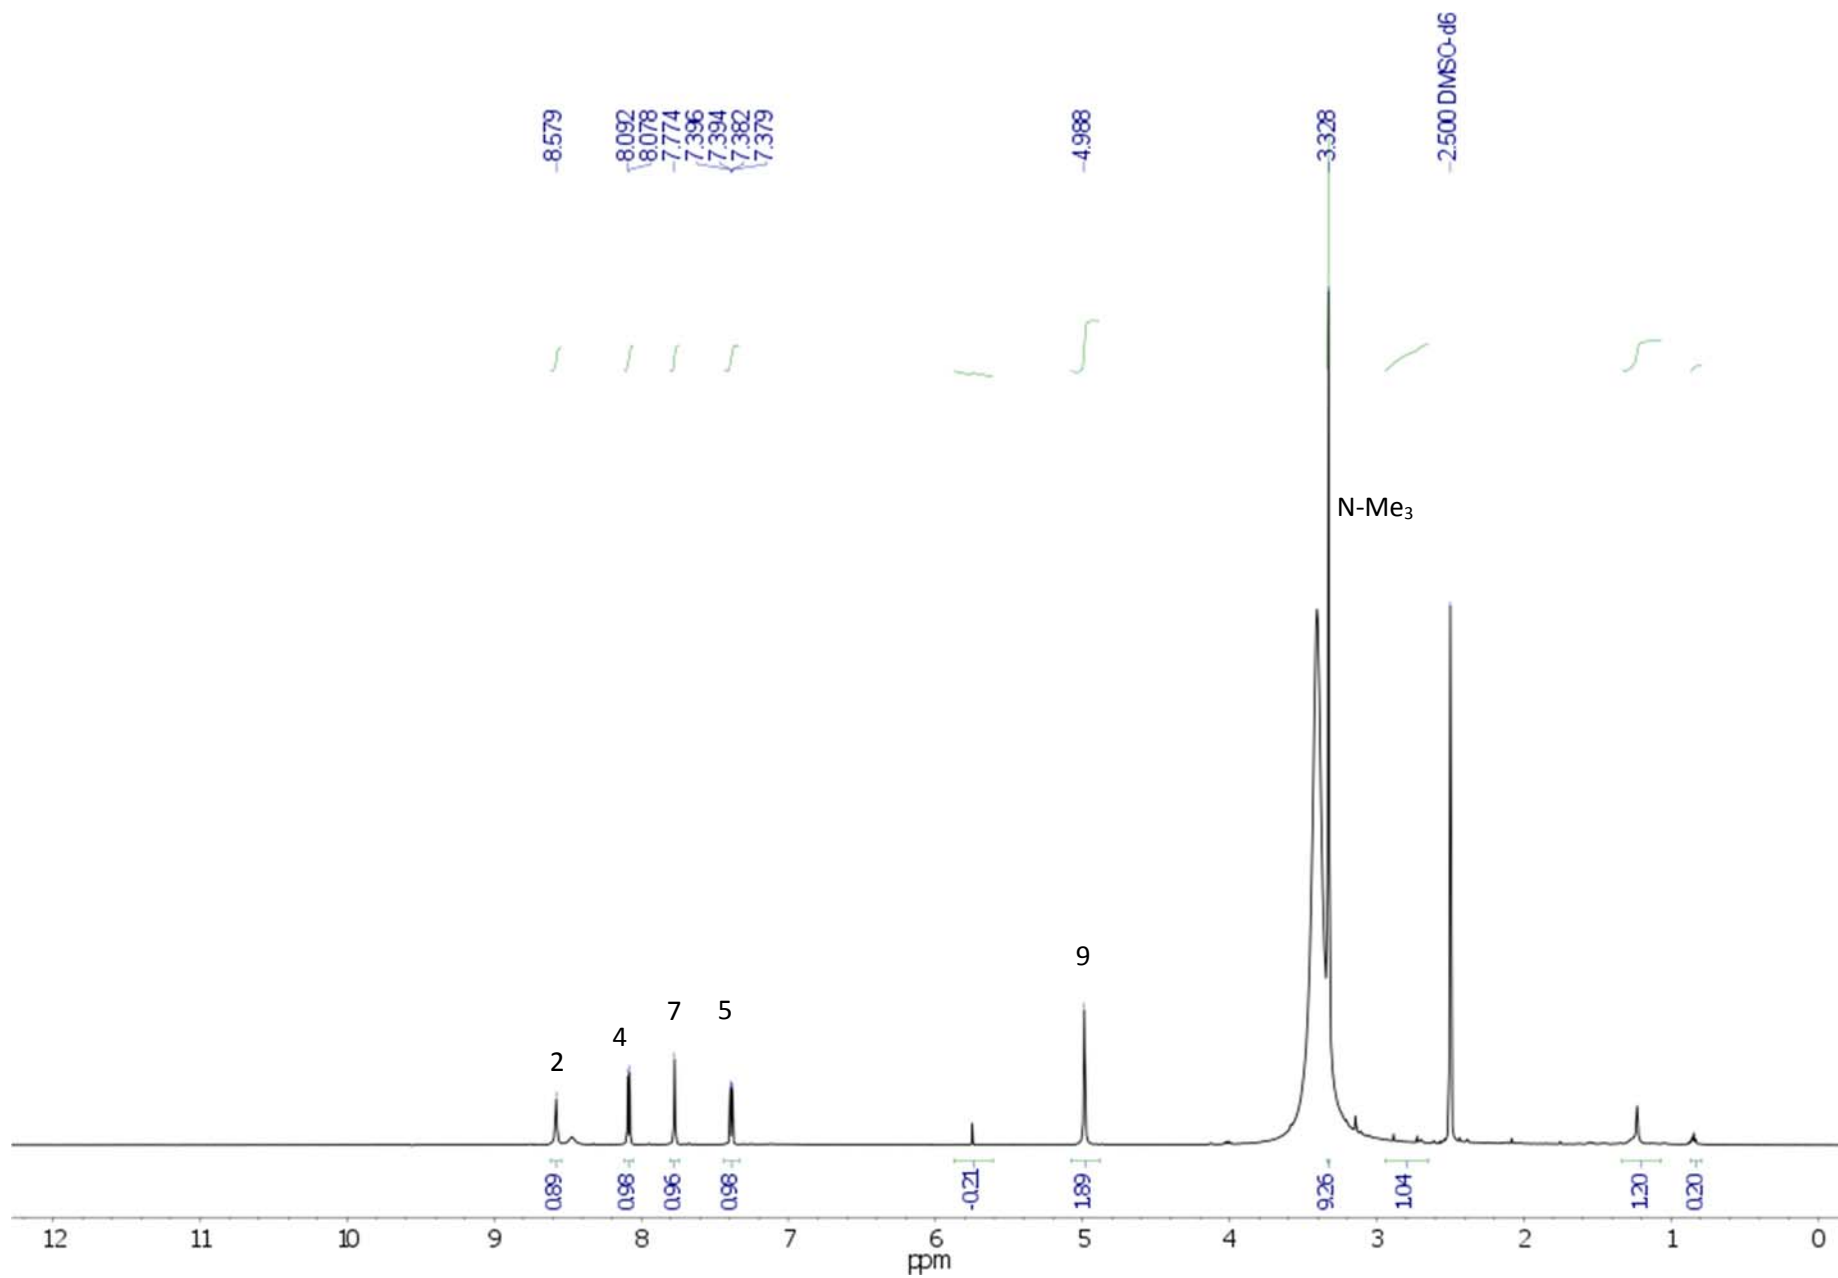

Figure S2.  $^{13}\text{C}$  NMR spectrum (150 MHz) of in DMSO-d<sub>6</sub>.

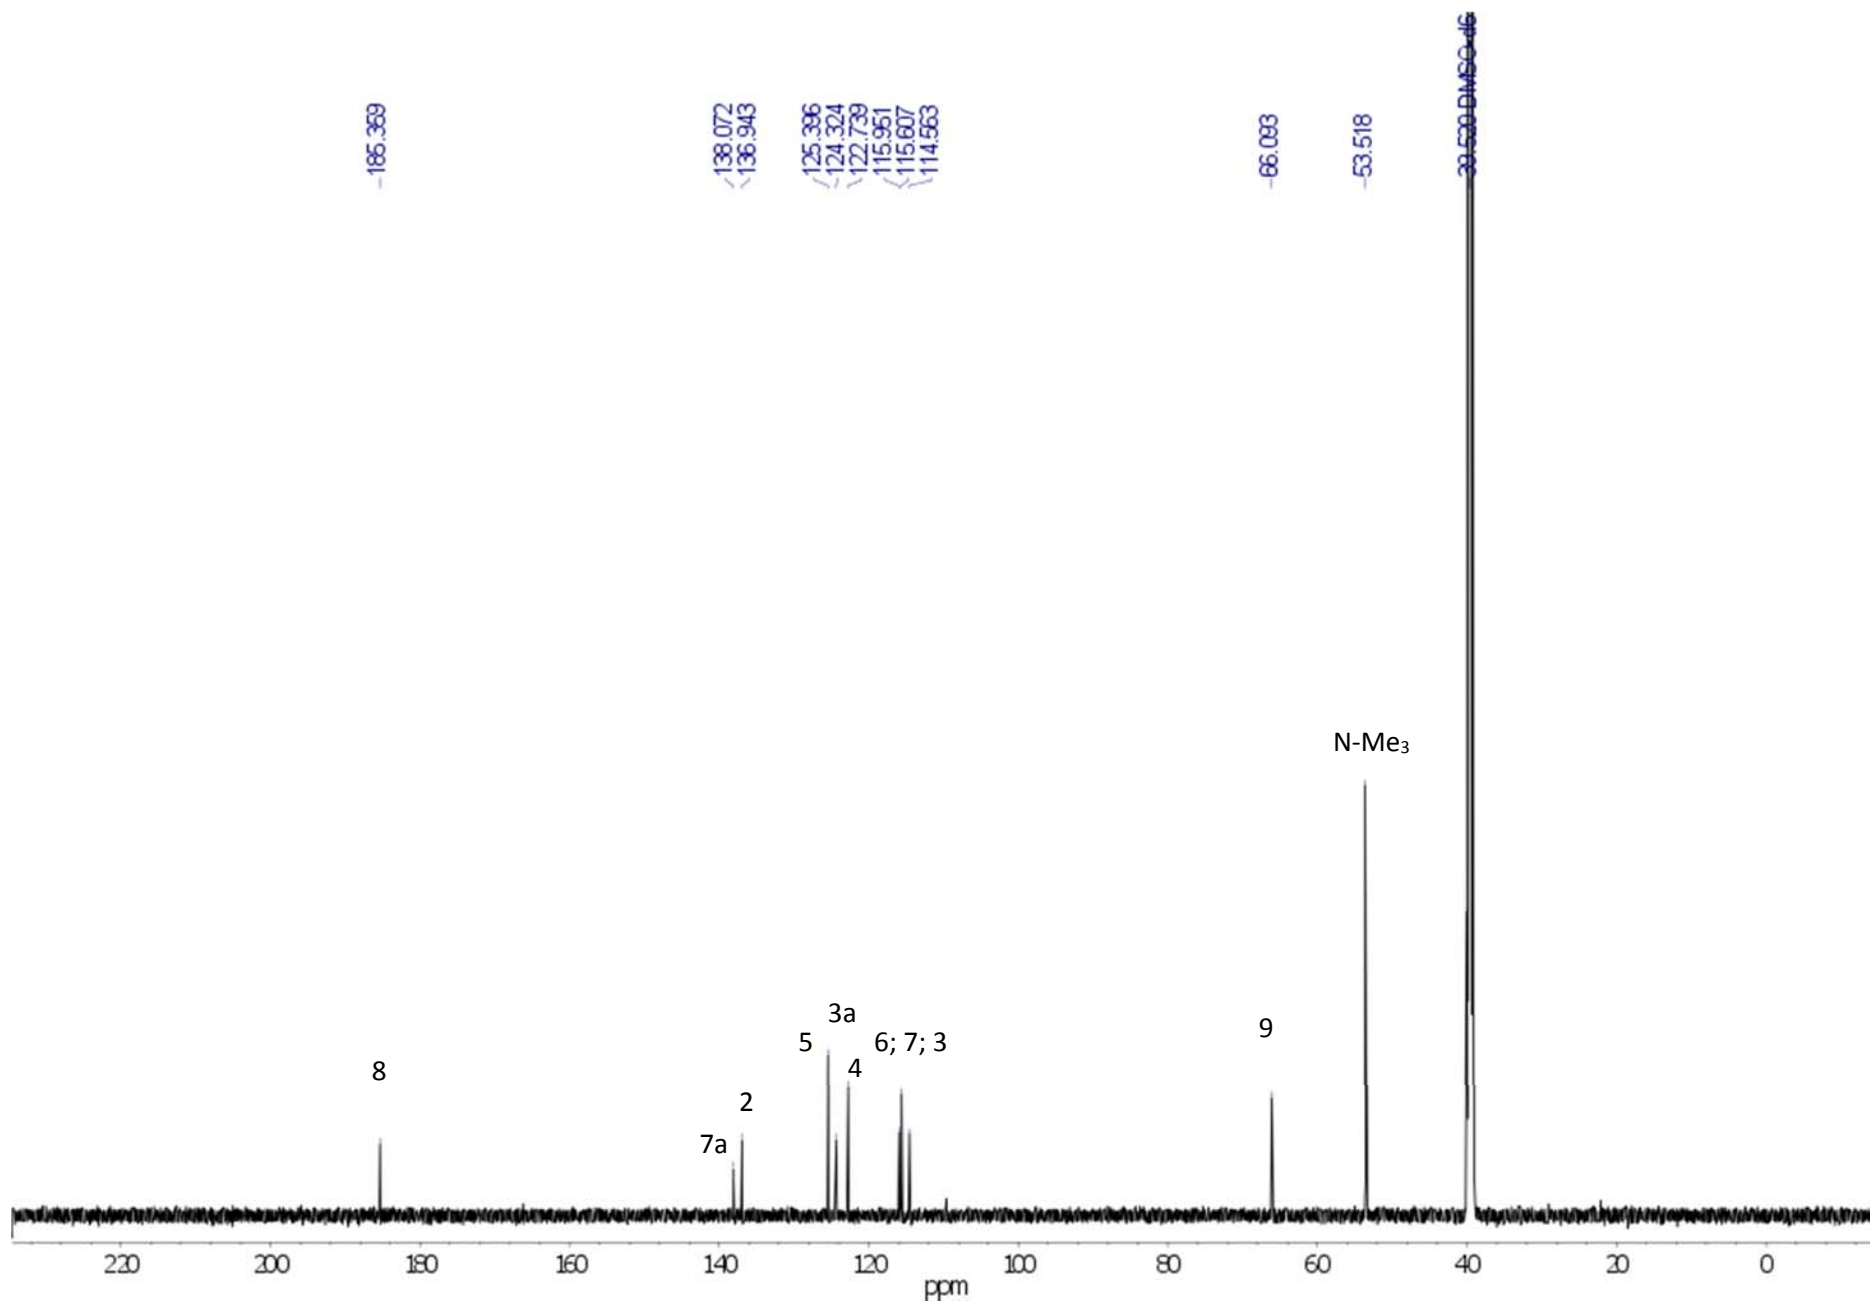

Figure S3. gHSQCAD spectrum (600MHz) of 6-Br-8-keto-conicamin A (**2**) in DMSO-d6.

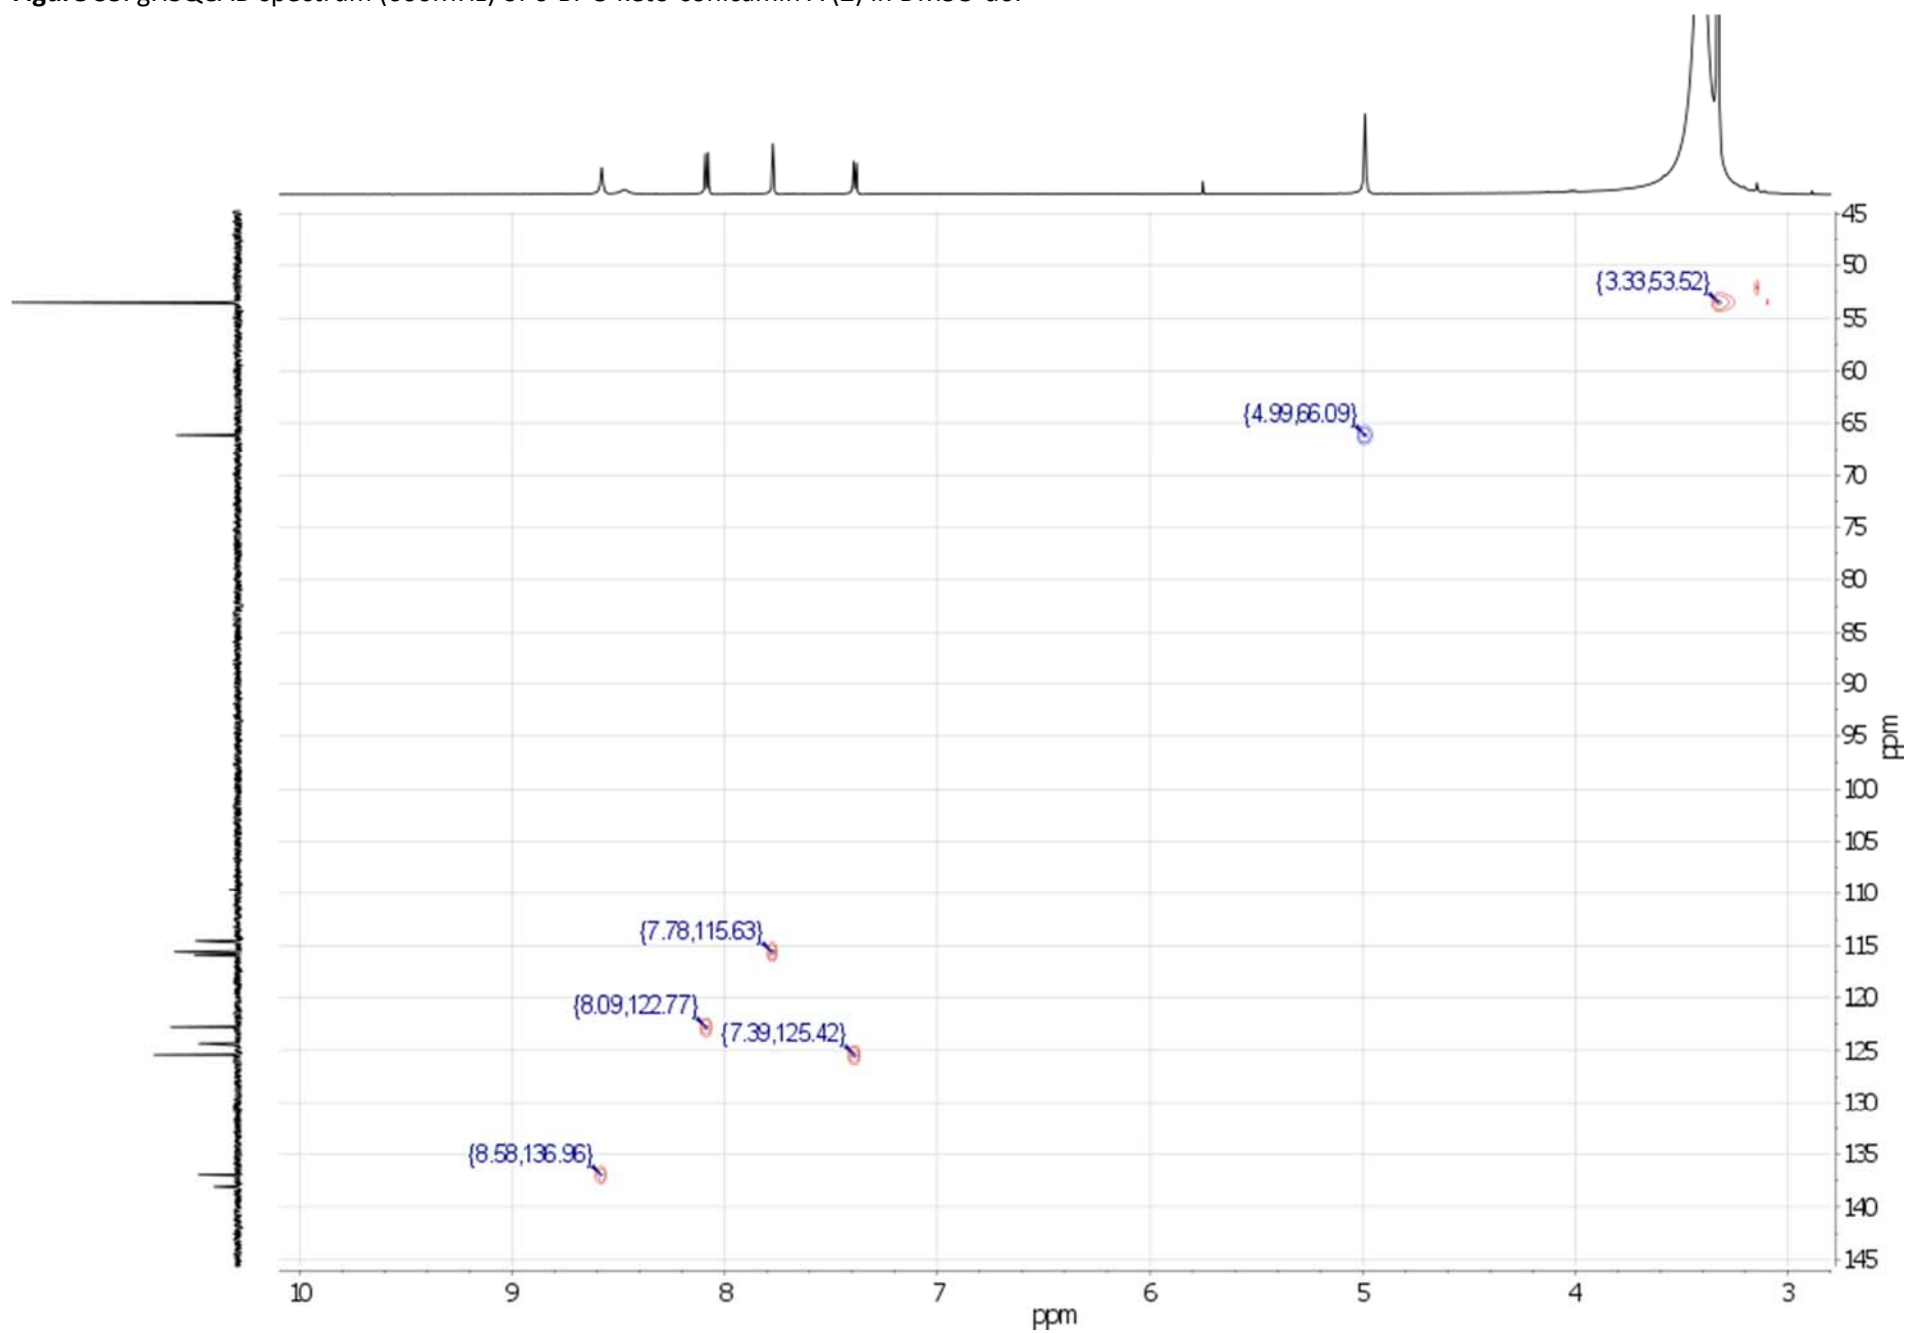

Figure S4. gHMBCAD spectrum (600MHz) of 6-Br-8-keto-conicamin A (**2**) in DMSO-d<sub>6</sub>.

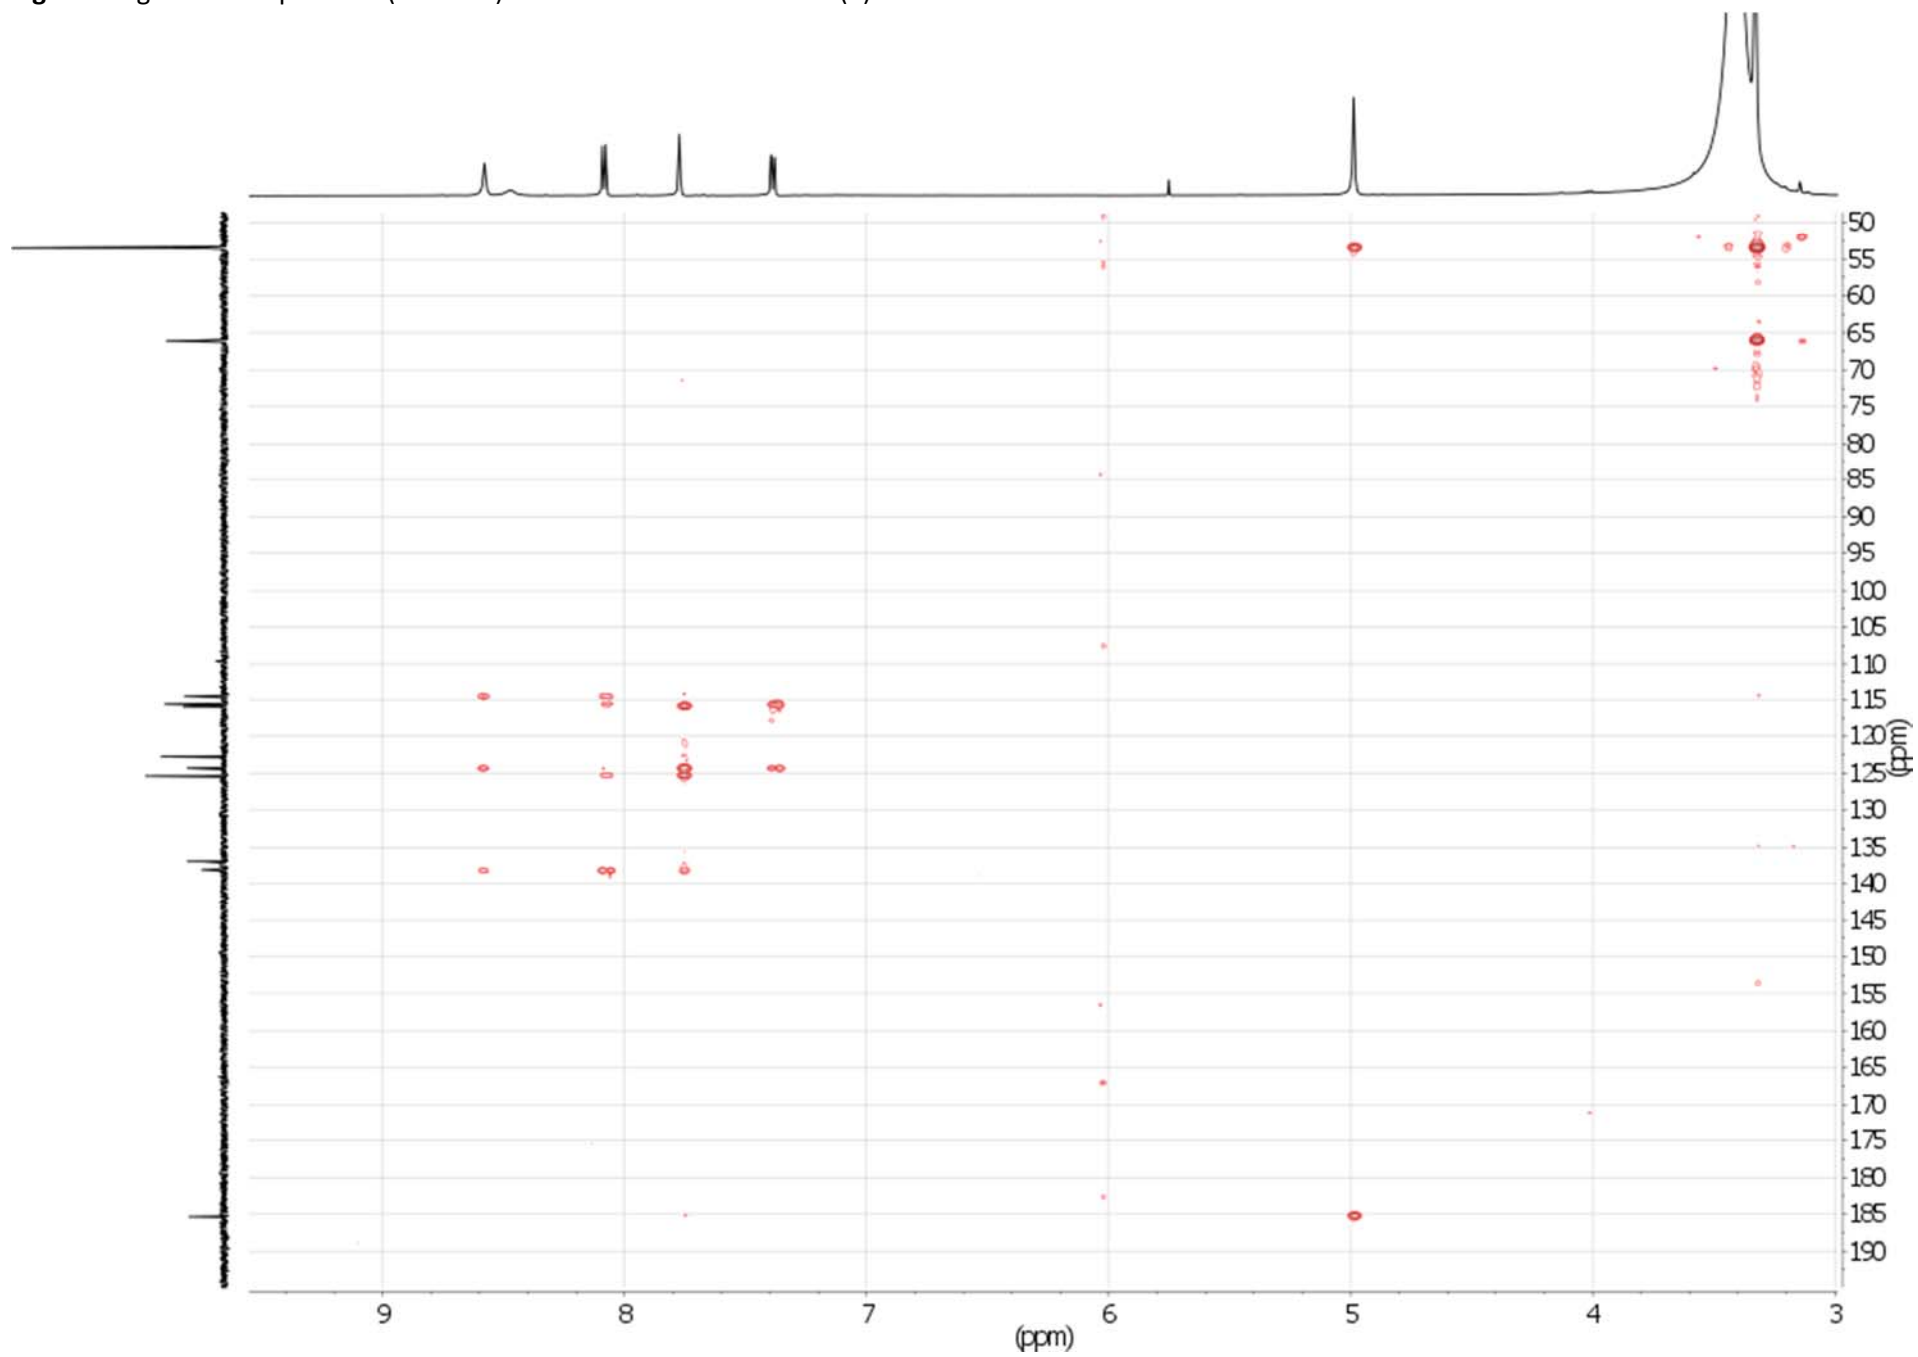

Figure S5.  $^1\text{H}$  spectrum (600 MHz) of 6-bromo- $\beta$ -oxo-*N,N,N*-trimethyl-tryptamine (formate salt) in DMSO- $d_6$ .

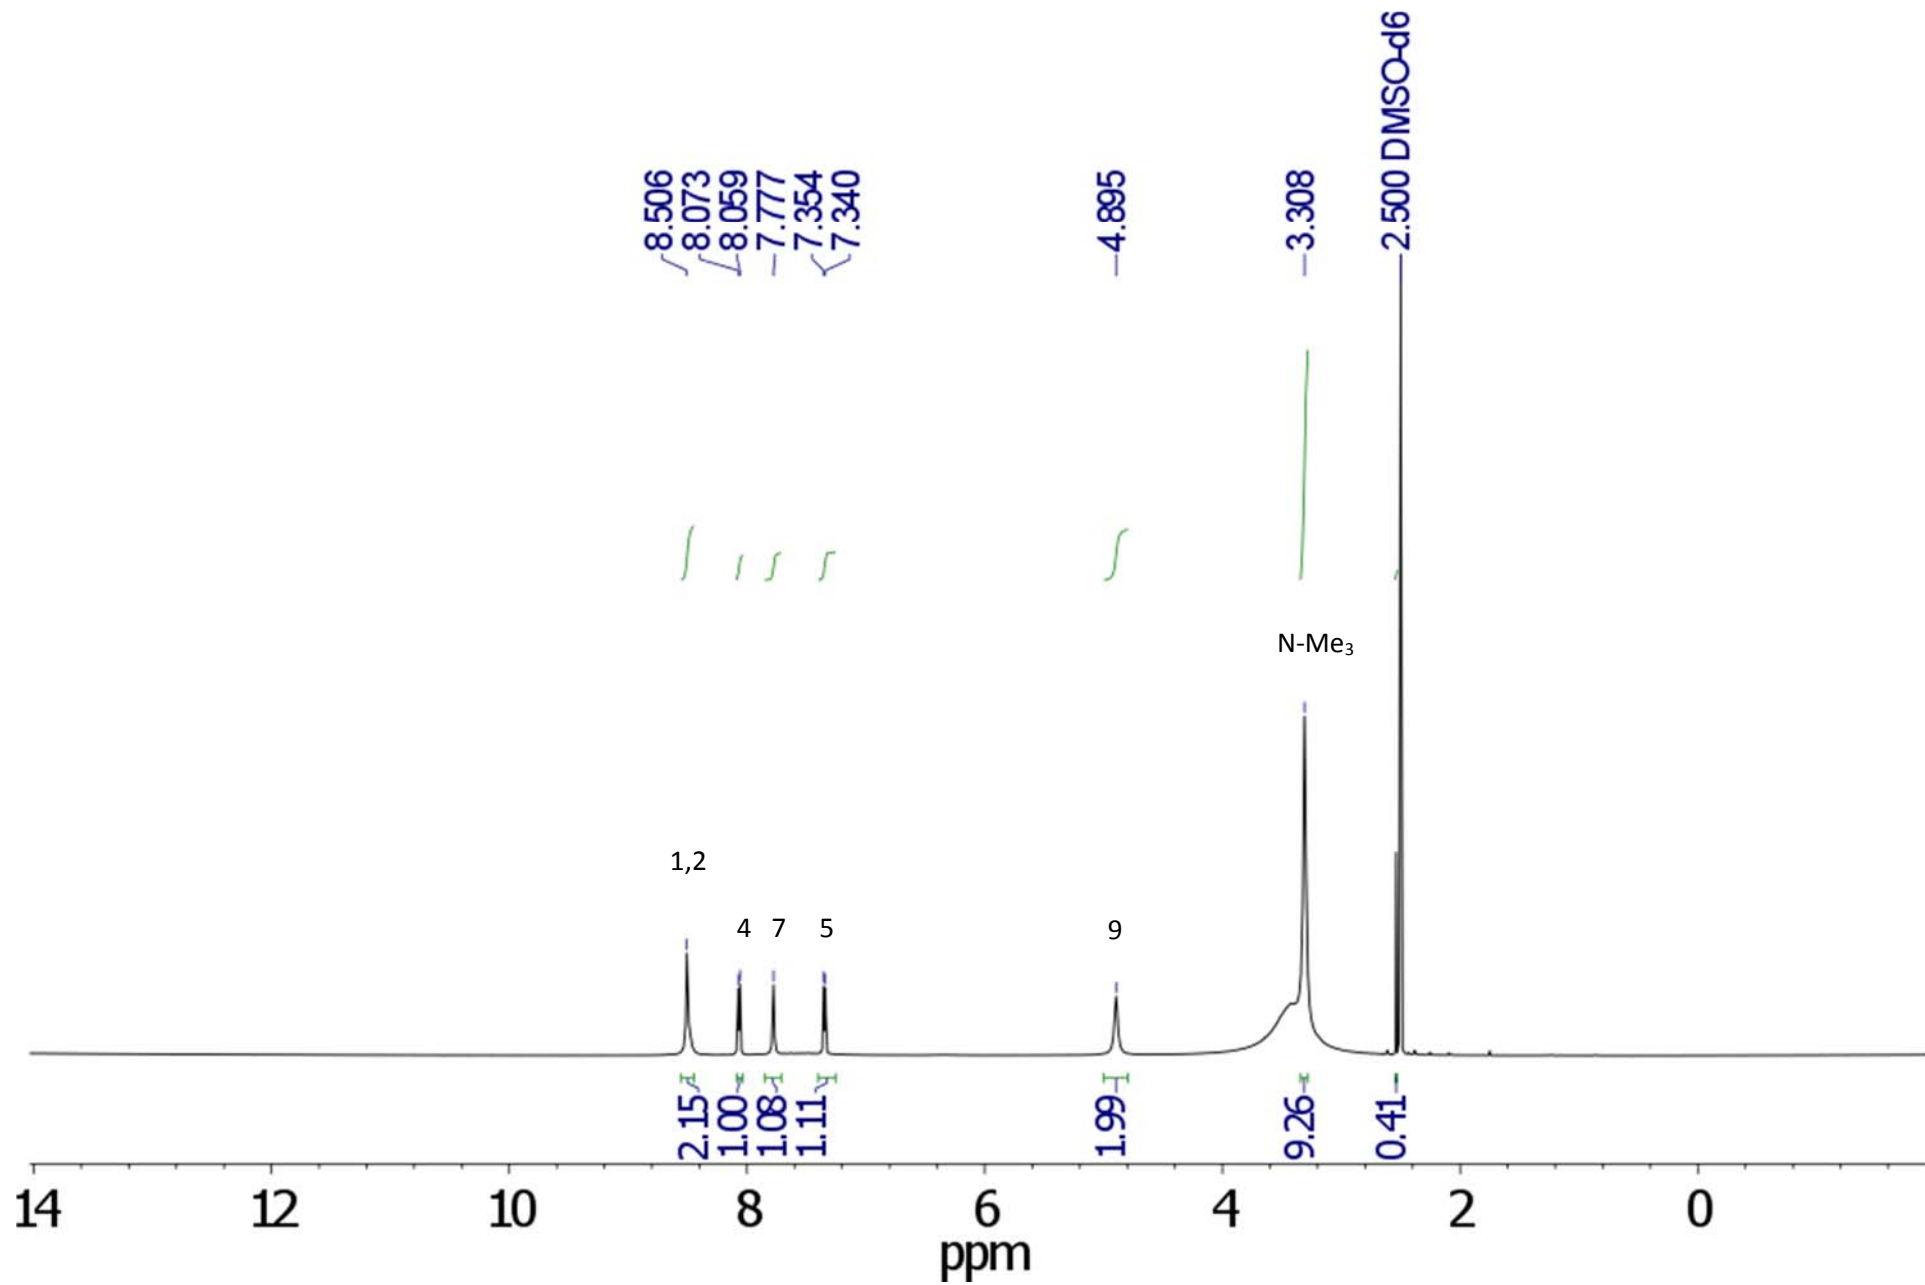

Figure S6.  $^{13}\text{C}$  spectrum (150 MHz) of 6-bromo-8-keto-*N,N,N*-trimethyl-tryptamine (**2s**) (formate salt) in DMSO- $d_6$ .

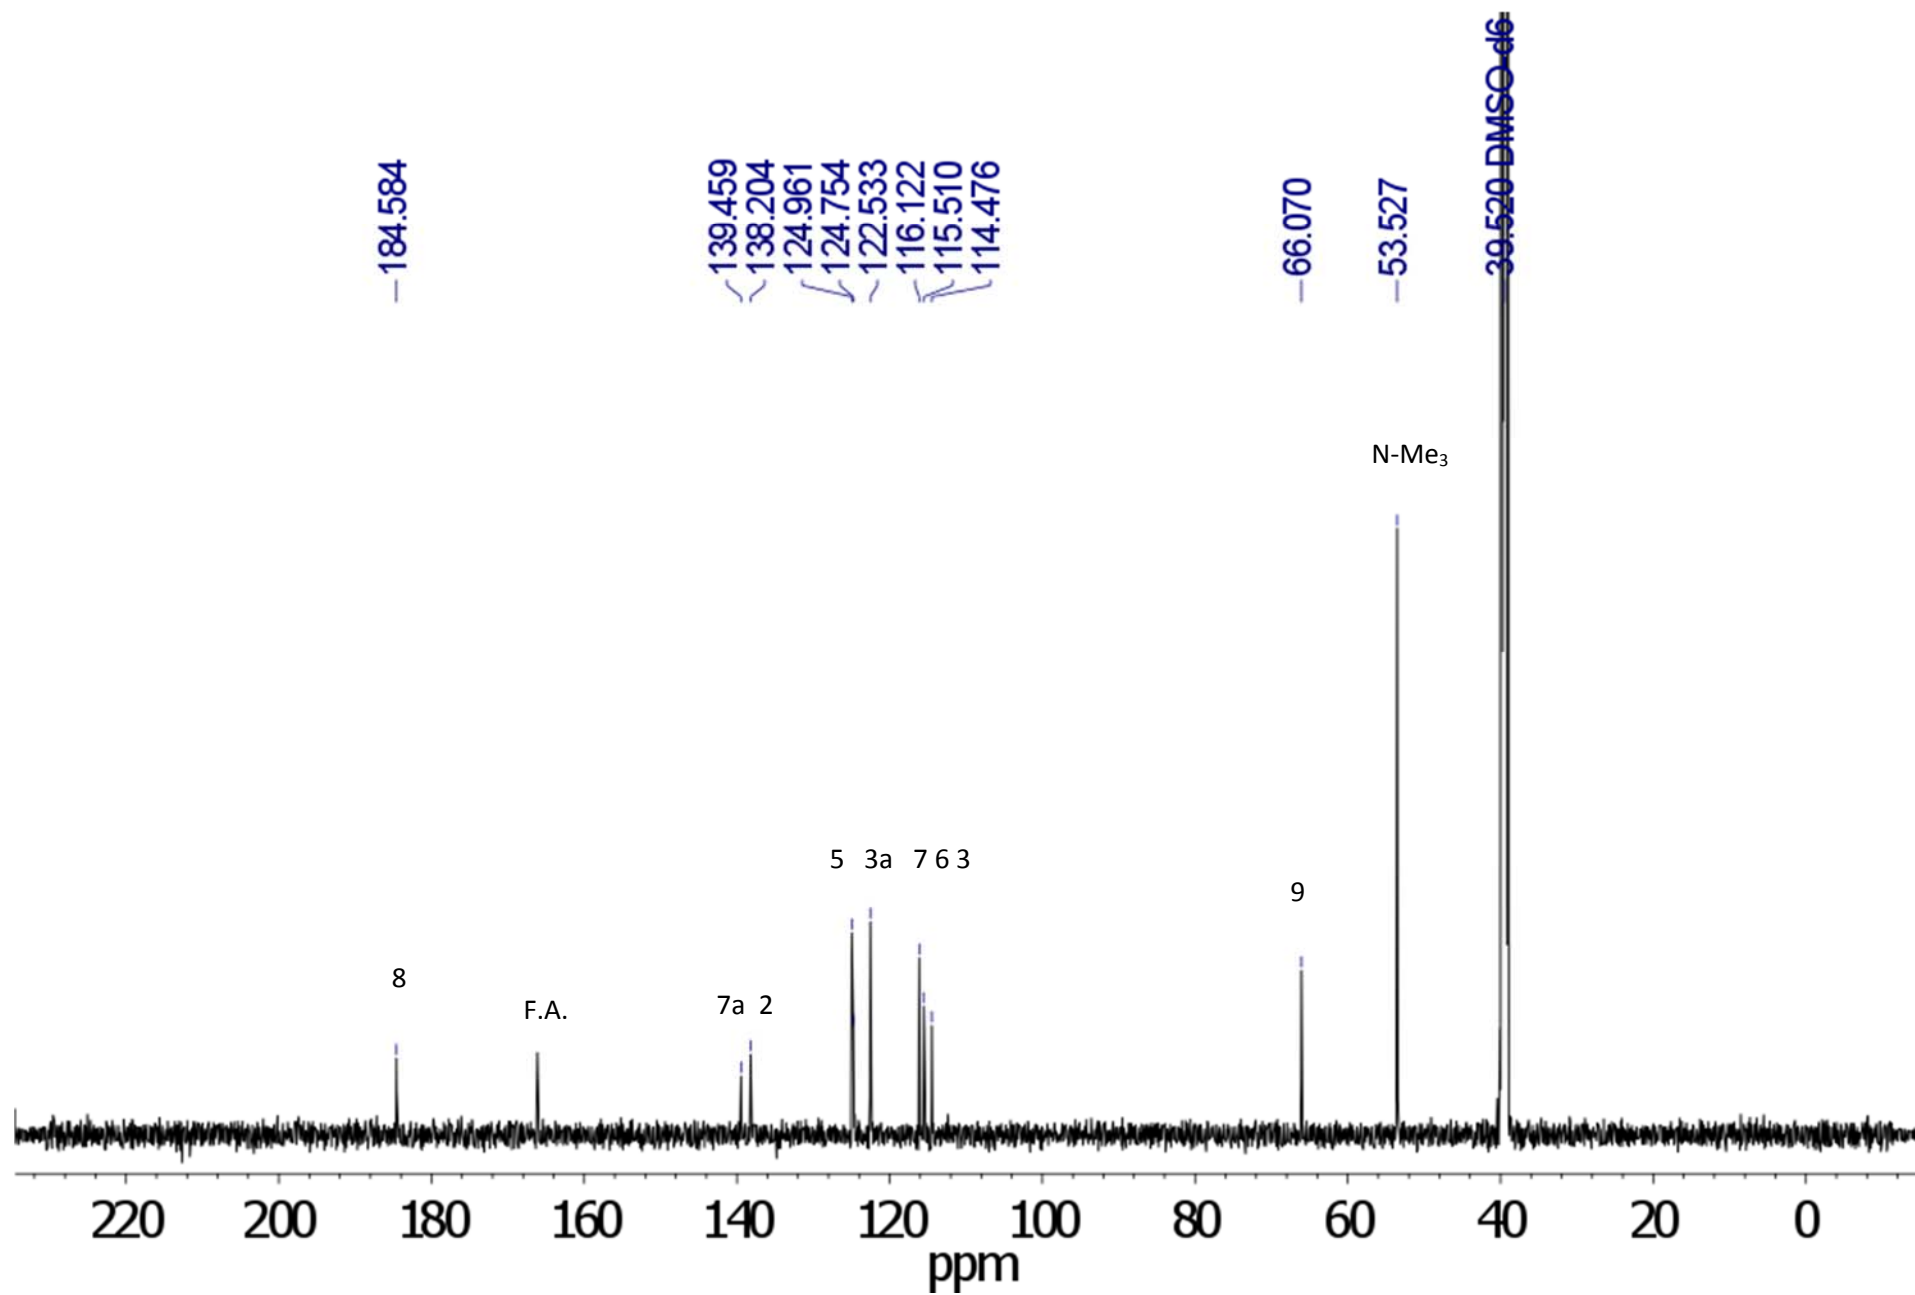



Figure S7.  $^1\text{H}$  spectrum (600 MHz) of 5-bromo-8-keto-*N,N,N*-trimethyl-tryptamine (**3**) (formate salt) in DMSO- $d_6$ .

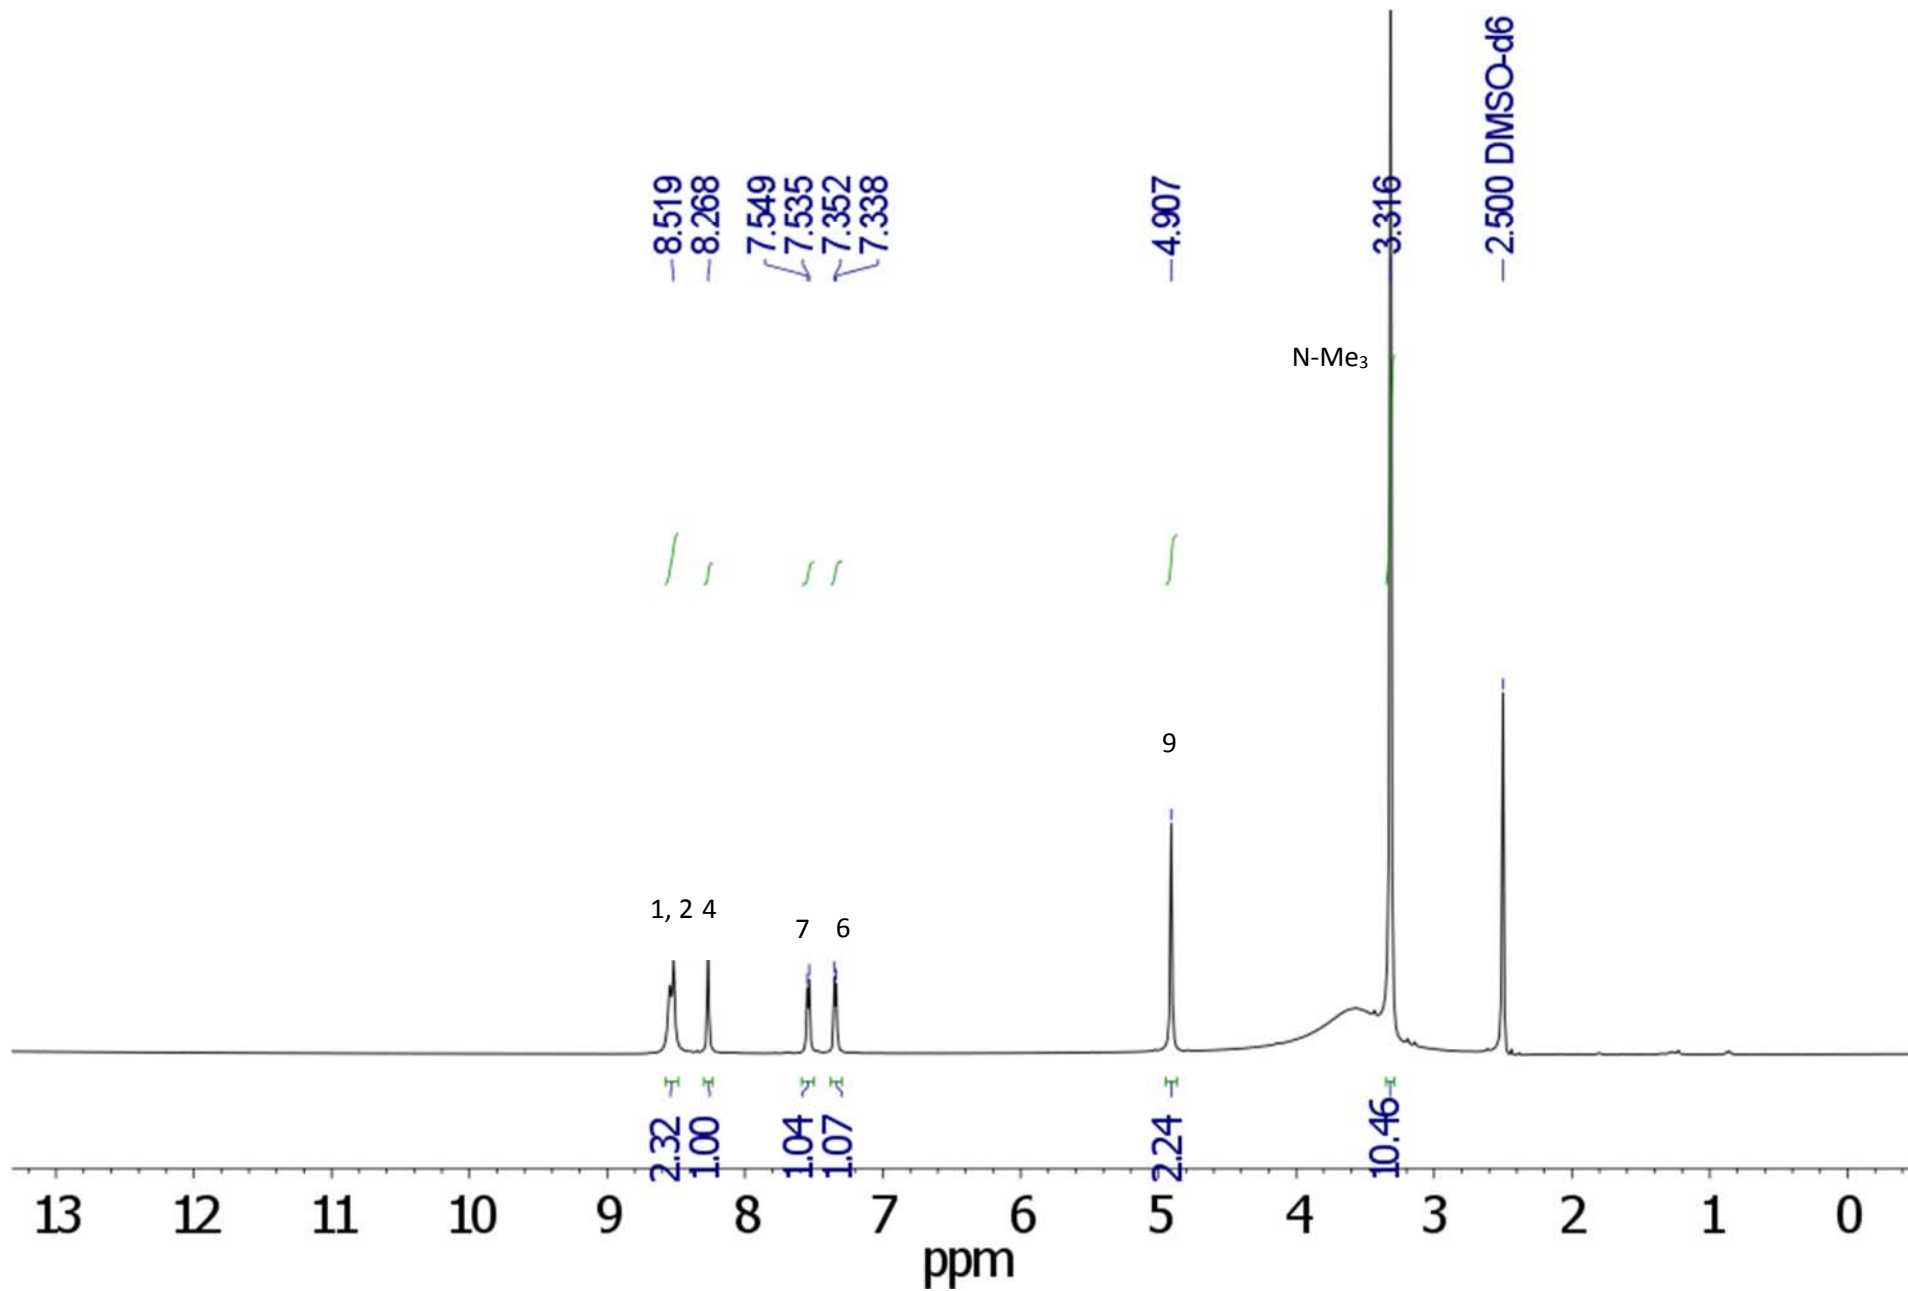

Figure S8.  $^{13}\text{C}$  spectrum (150 MHz) of 5-bromo-8-keto-*N,N,N*-trimethyl-tryptamine (**3**) (formate salt) in DMSO- $d_6$ .

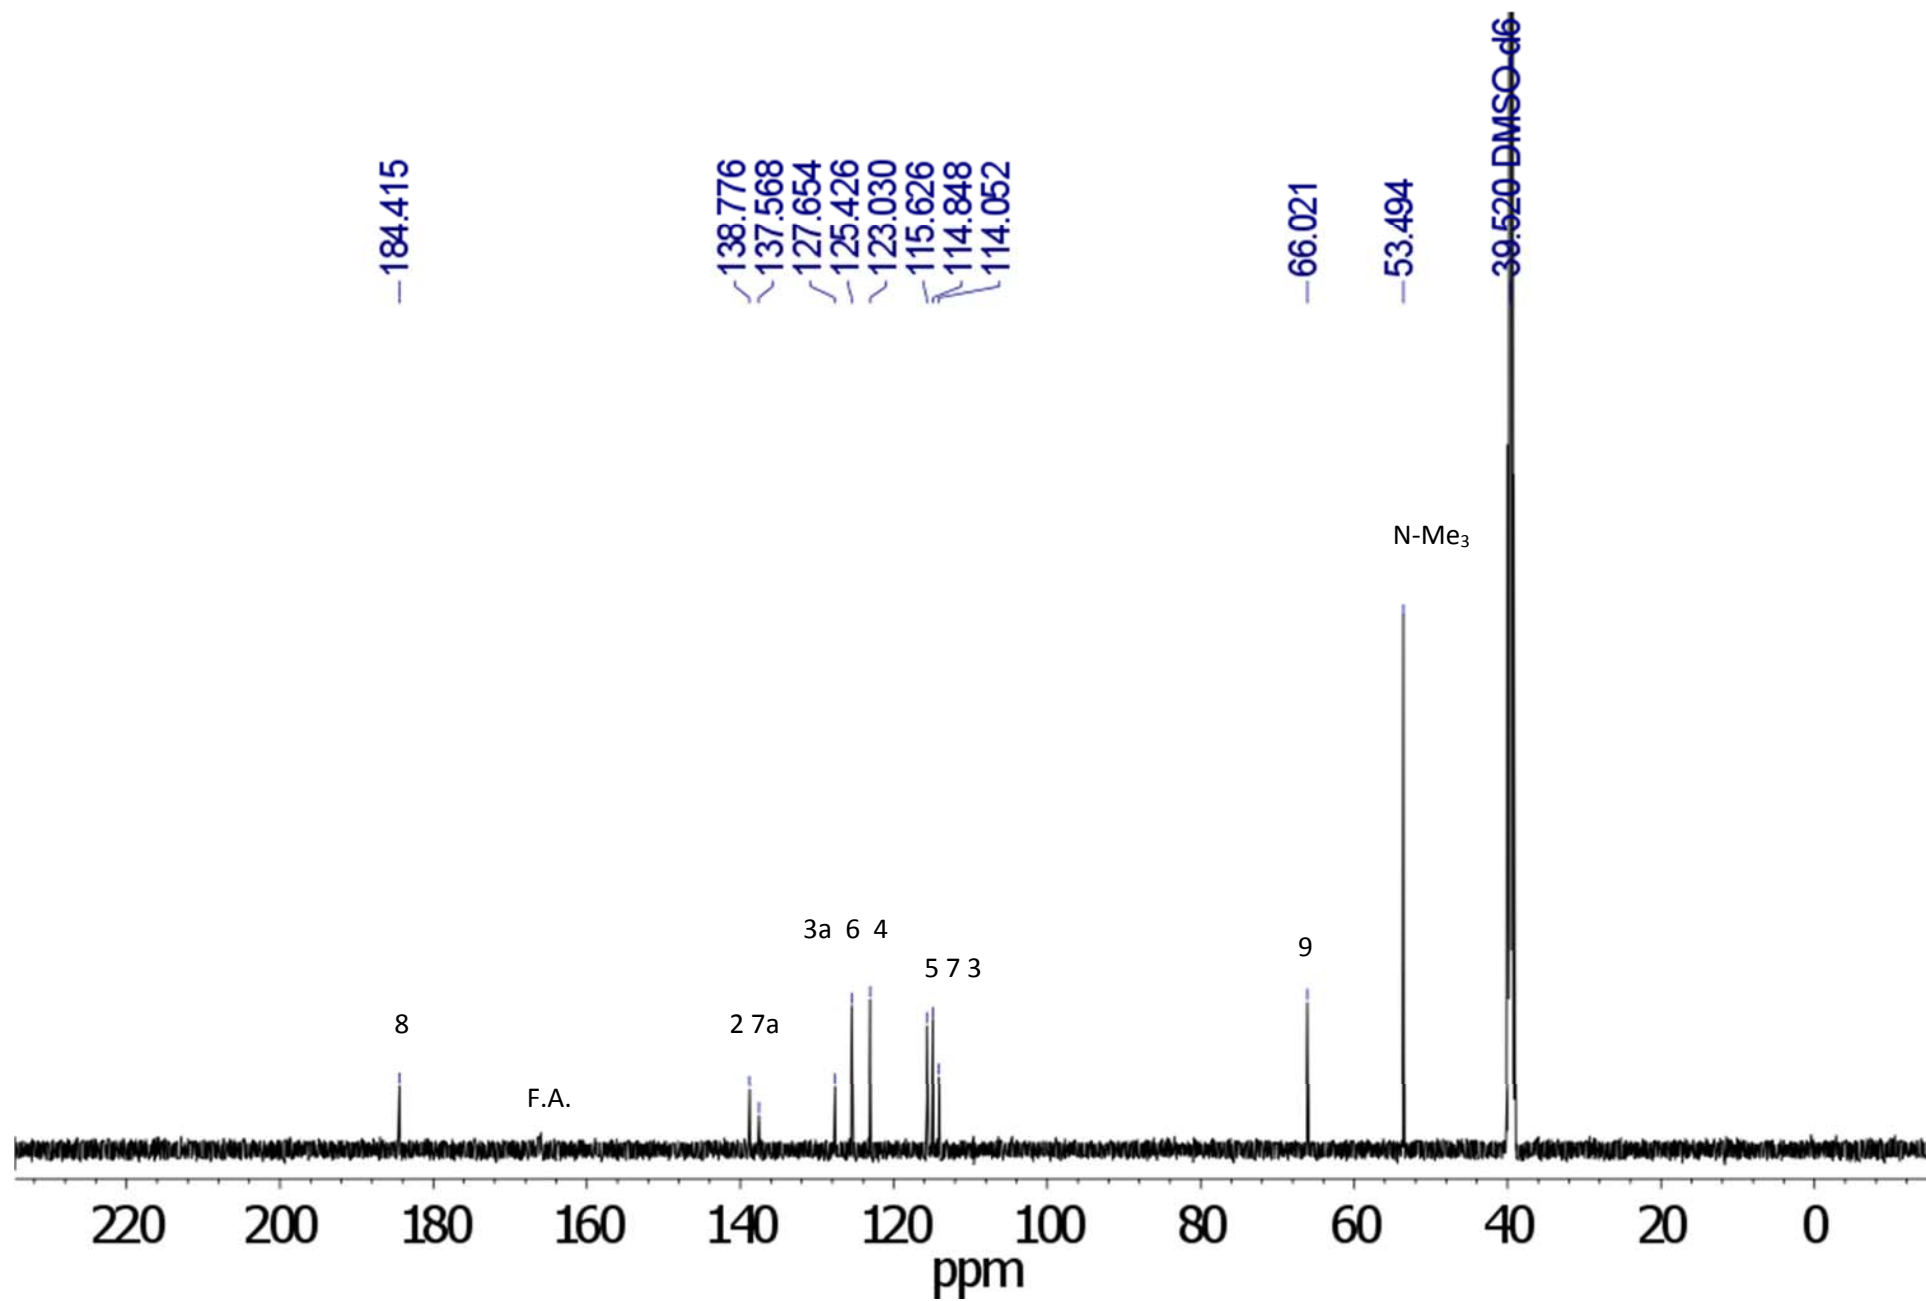

**Figure S9.** Stacked  $^{13}\text{C}$  NMR spectra of the natural product and 5- and 6-bromo isomers of beta-keto-N,N,N-trimethyl-tryptamine (150MHz, DMSO-d6)

5-bromo-b-oxo-N,N,N-trimethyl tryptamine

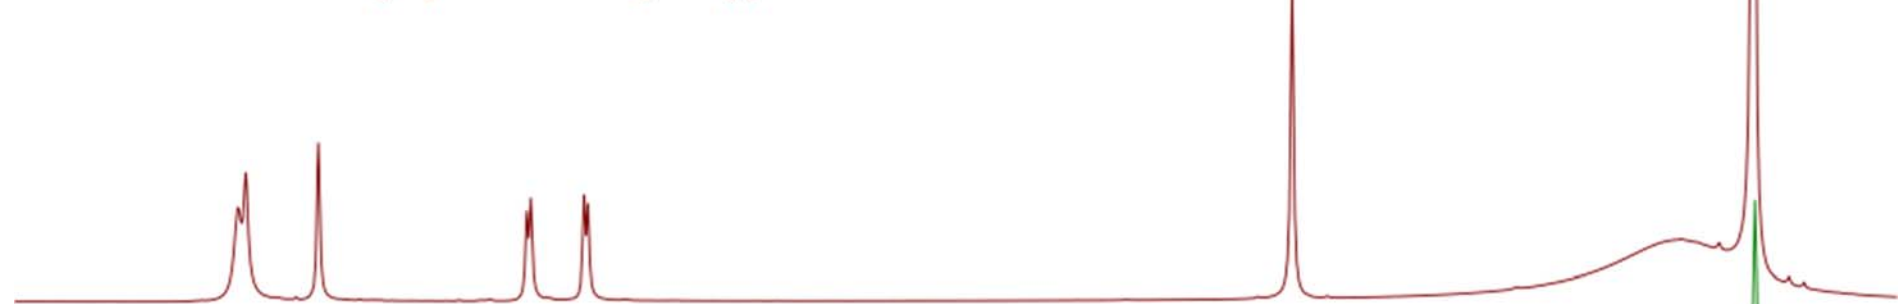

6-bromo-b-oxo-N,N,N-trimethyl tryptamine

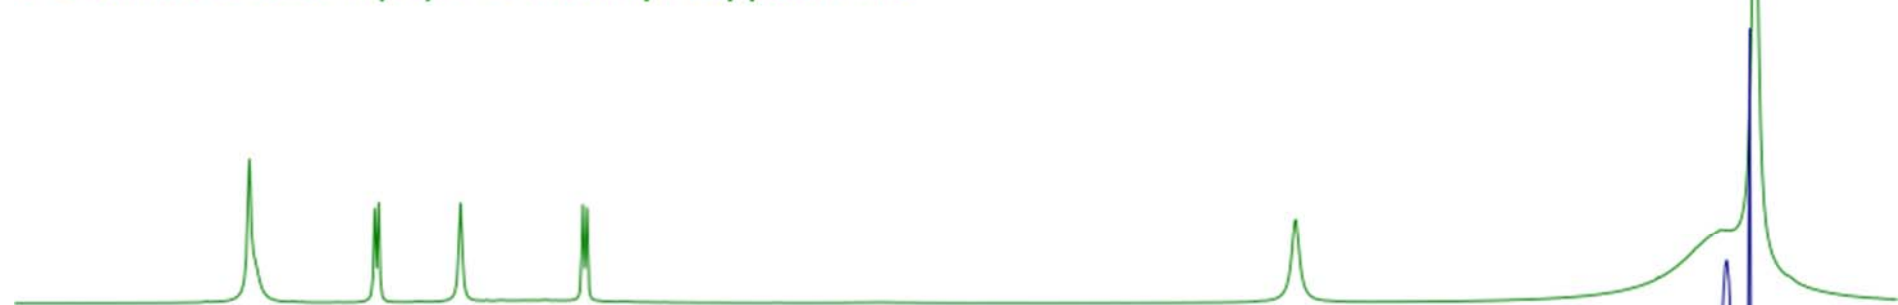

6-Br-8-keto-conicamin A (2)

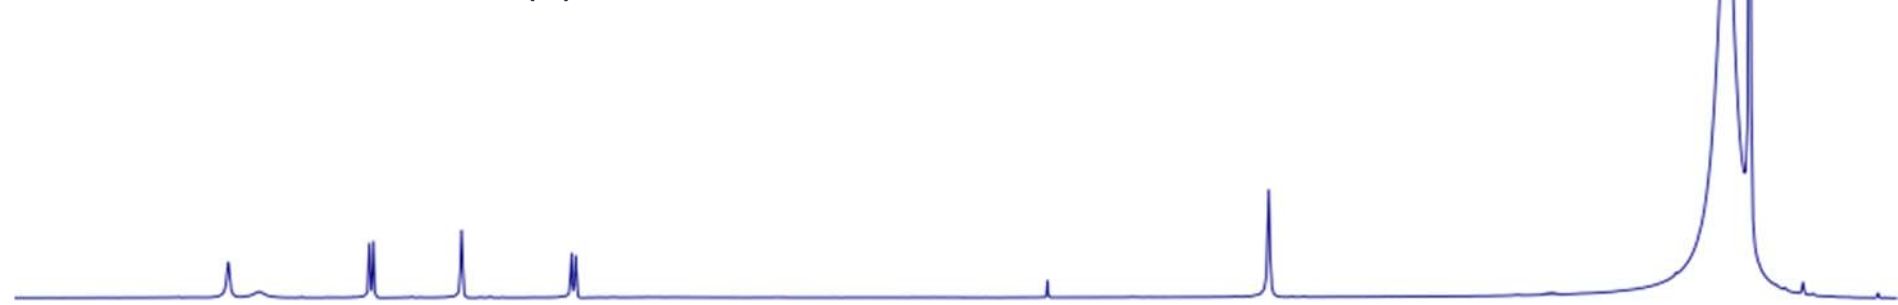

9 8 7 6 5 4 3  
ppm

Figure S10. Stacked  $^{13}\text{C}$  NMR spectra of the natural product and 5- and 6-bromo isomers of beta-oxo-tryptamine (150MHz, DMSO-d6)

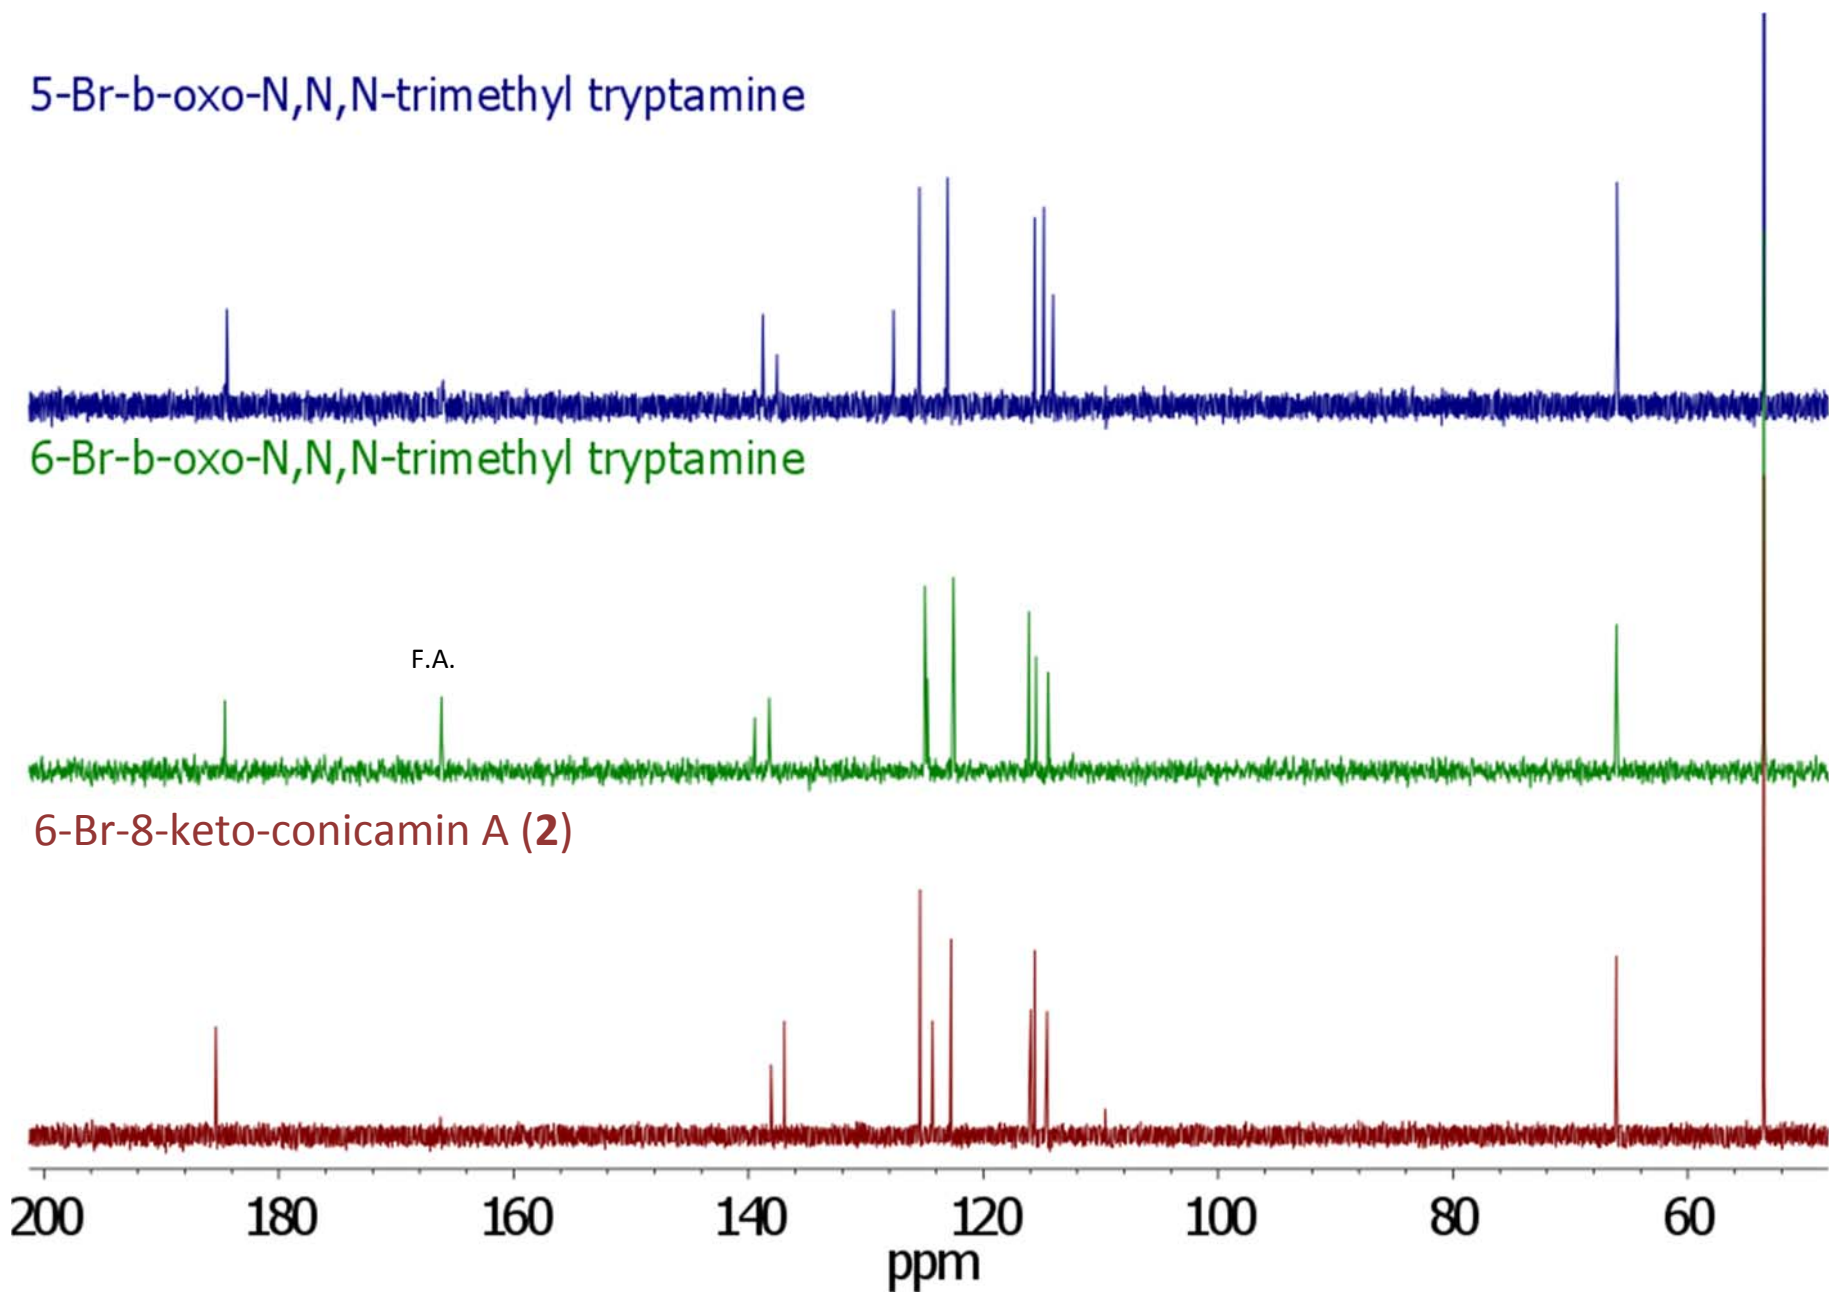

**Figure S11.**  $^1\text{H}$  spectrum (600 MHz) of 5 $\mu\text{L}$  formic acid in DMSO- $d_6$ . Note that chemical shift varies with presence of other compounds.

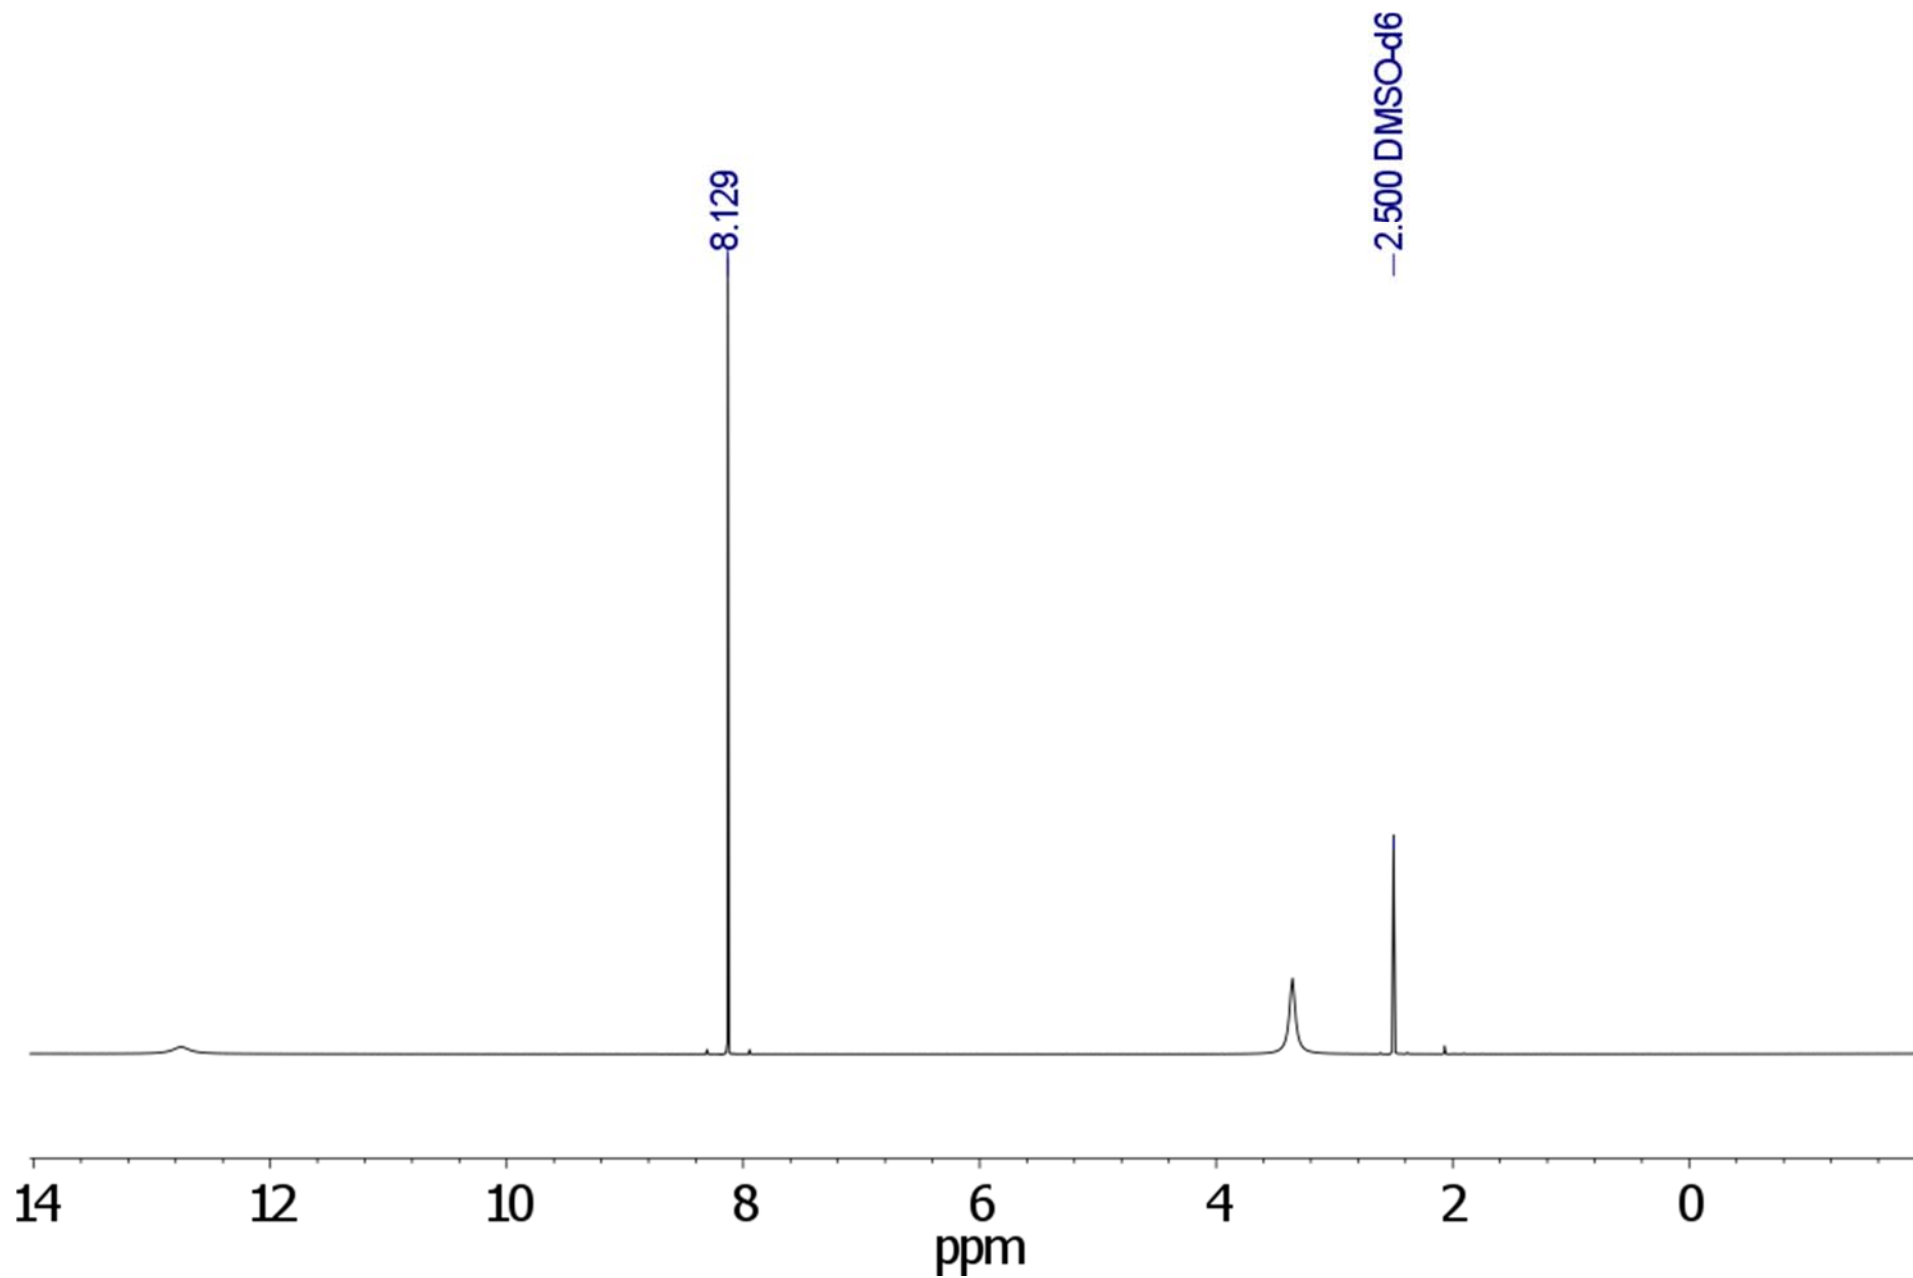

**Figure S12.**  $^{13}\text{C}$  spectrum (150 MHz) of 5 $\mu\text{L}$  formic acid in DMSO- $d_6$ . Note that chemical shift varies with presence of other compounds.

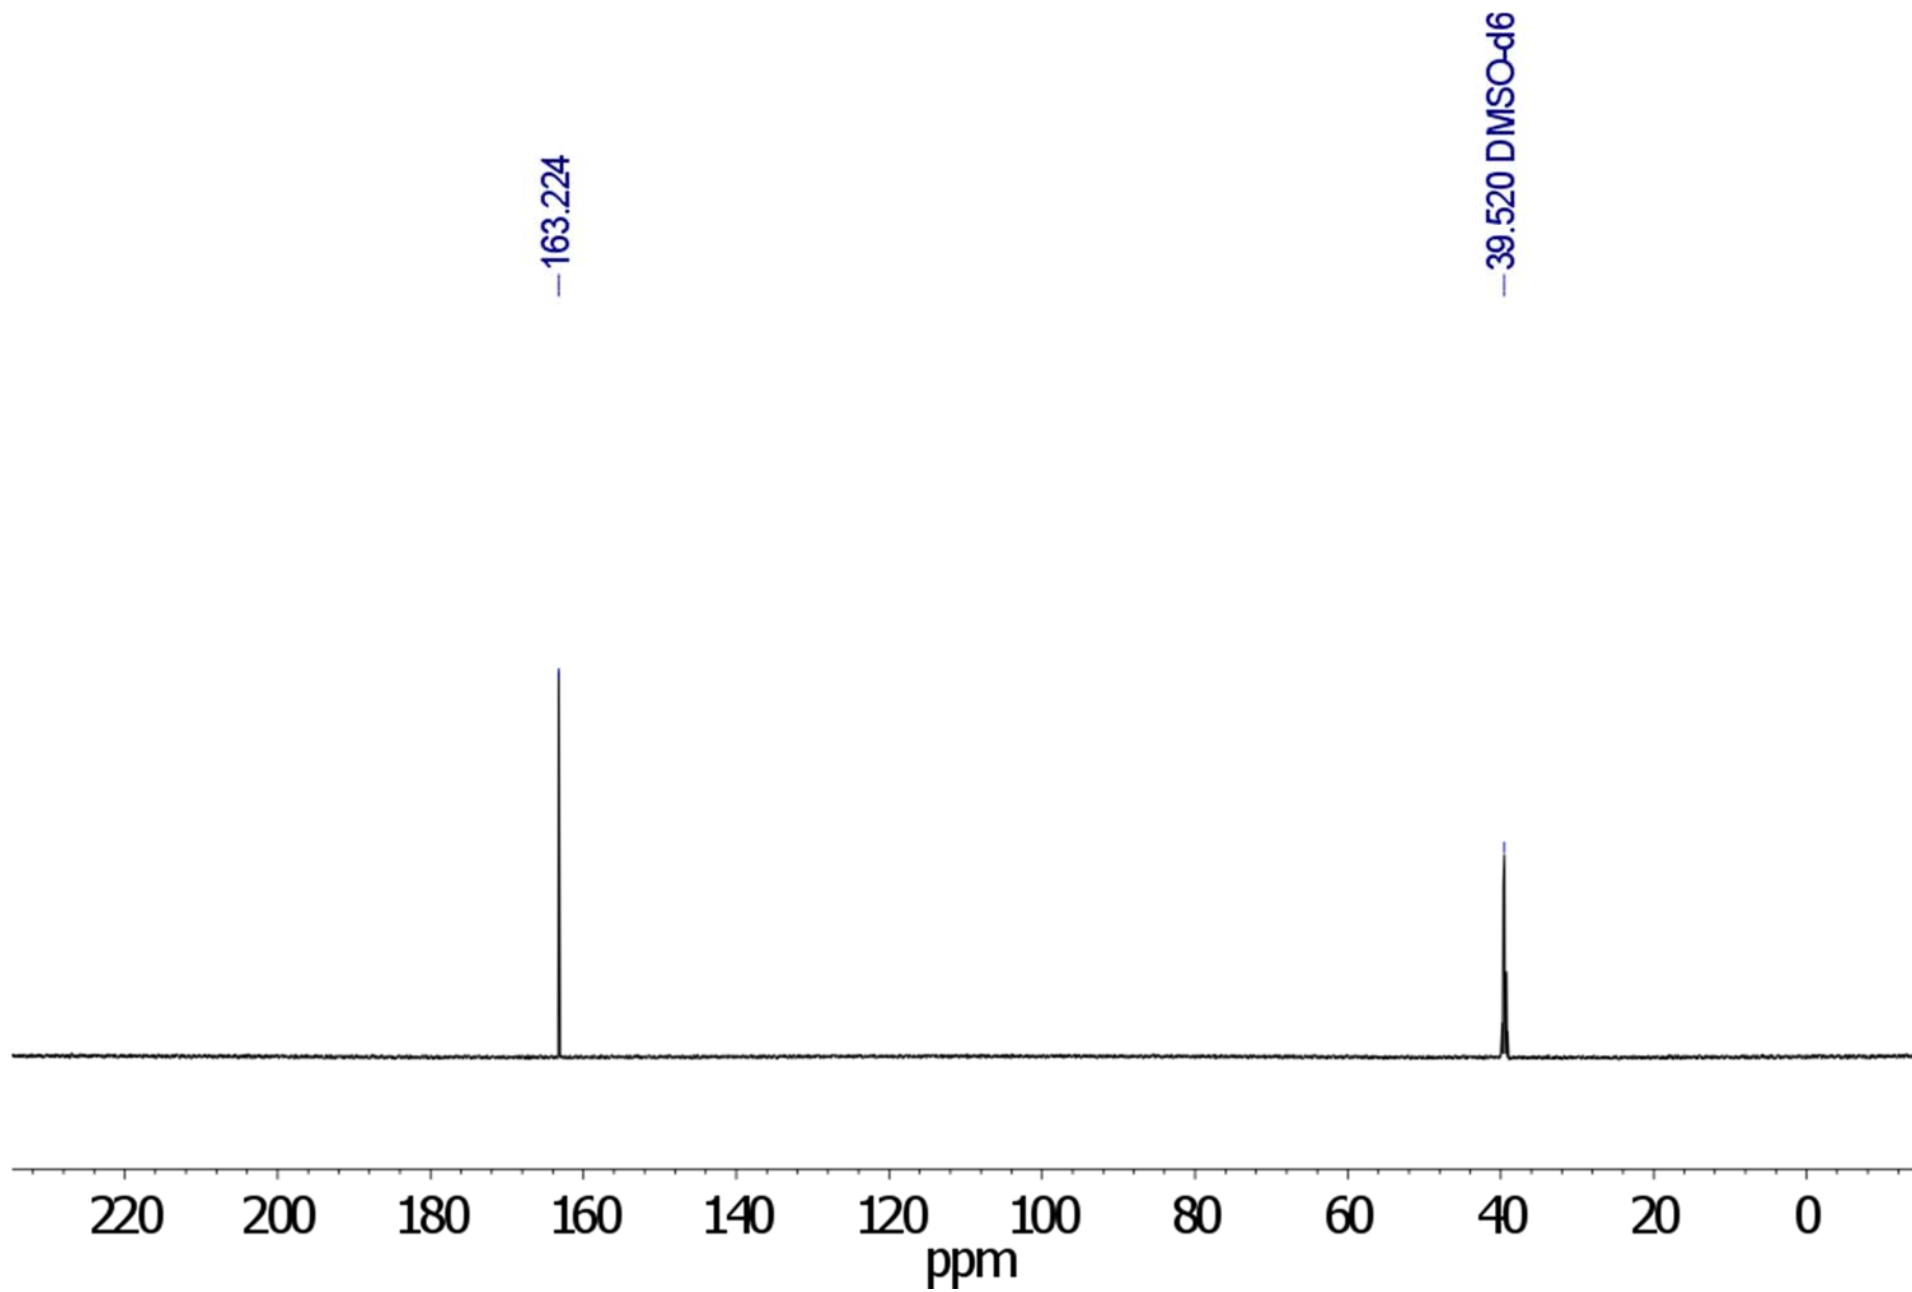

Figure S13.  $^1\text{H}$  spectrum (600 MHz) of 2-(6-Bromo-1H-indol-3-yl)-2-(trimethylsiloxy)acetonitrile (**7**) in DMSO- $d_6$ .

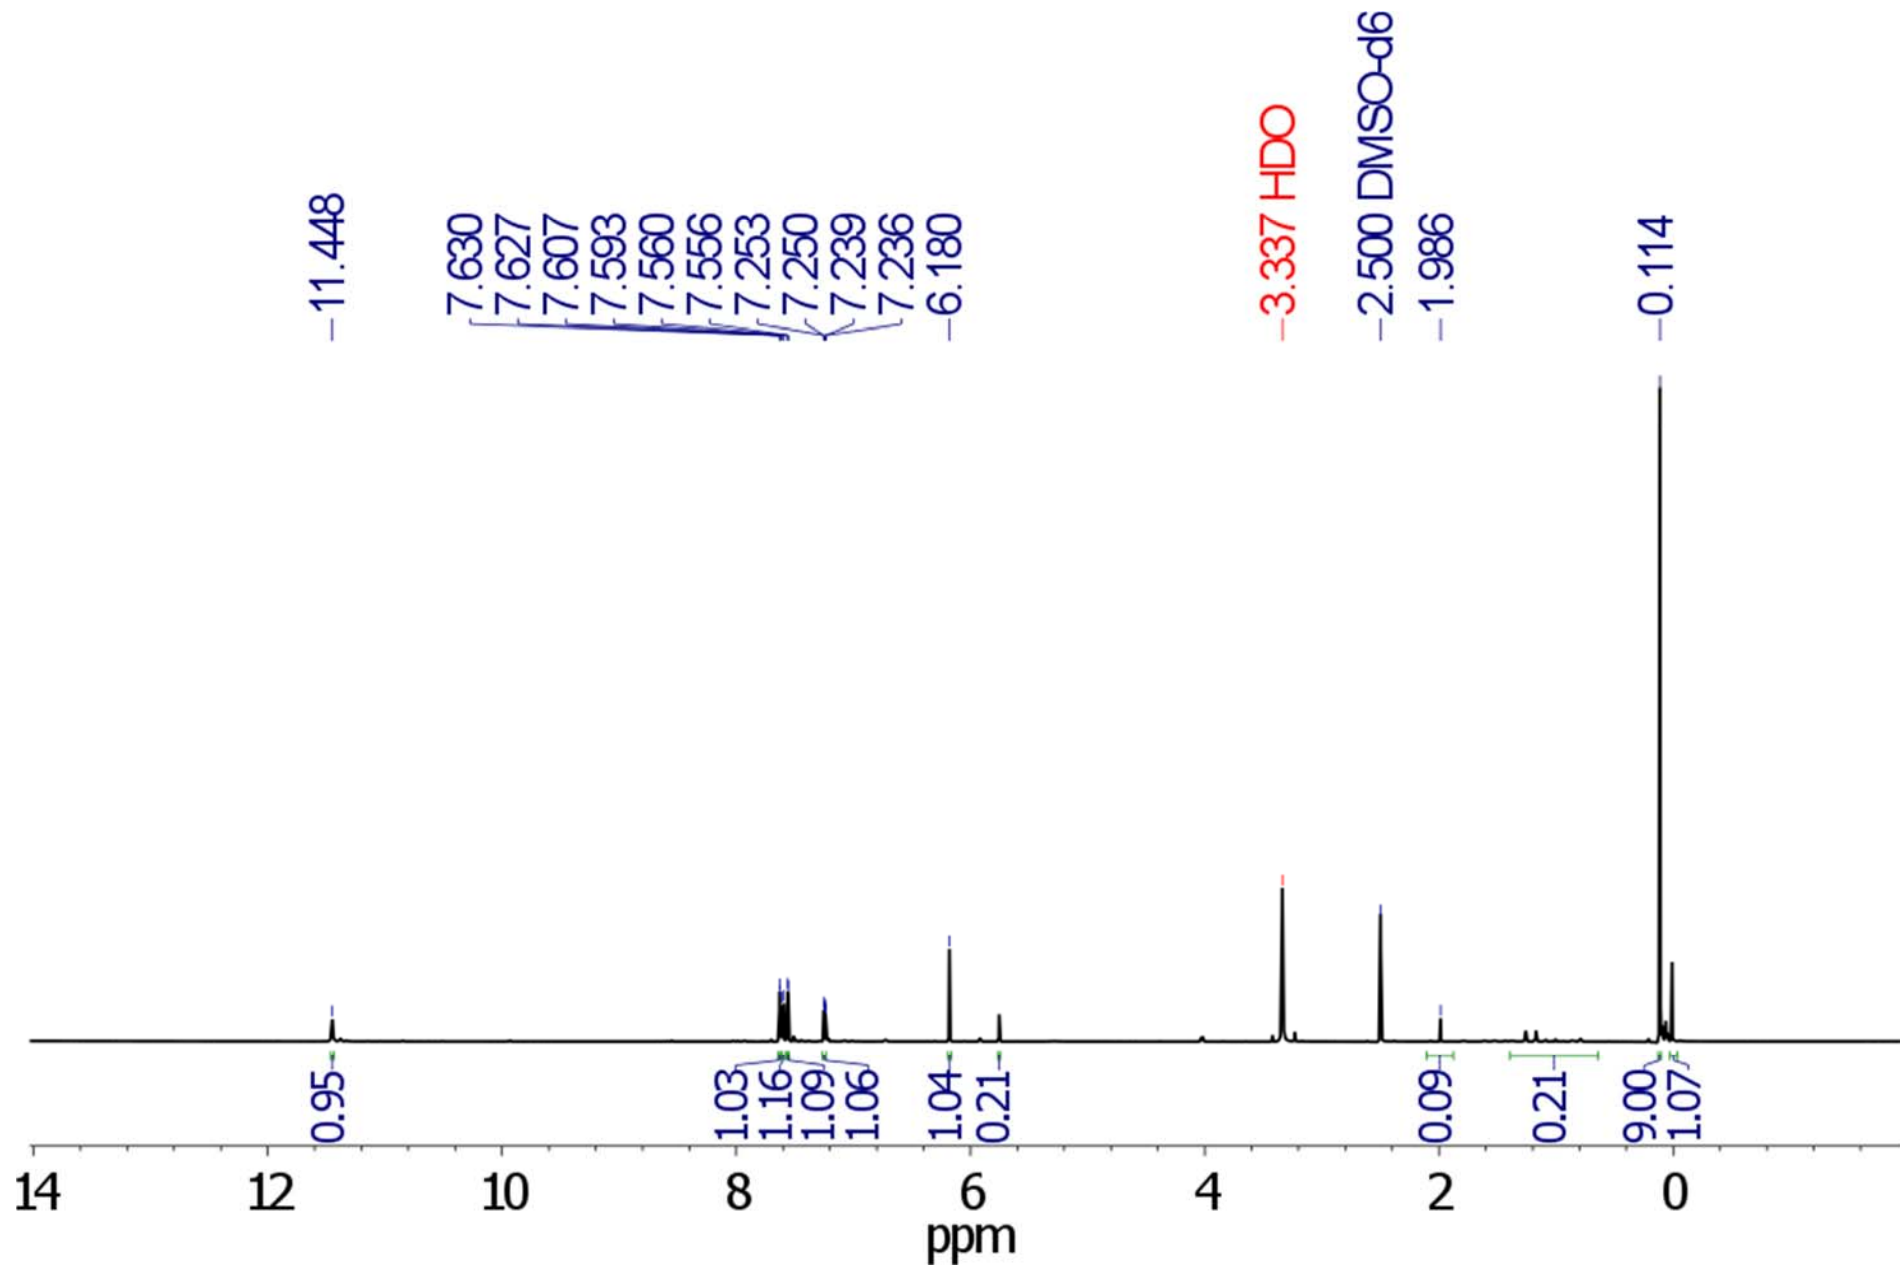

Figure S14.  $^{13}\text{C}$  spectrum (150 MHz) of (6-Bromo-1H-indol-3yl)-(trimethylsiloxy)acetonitrile (**7**) in DMSO- $d_6$ .

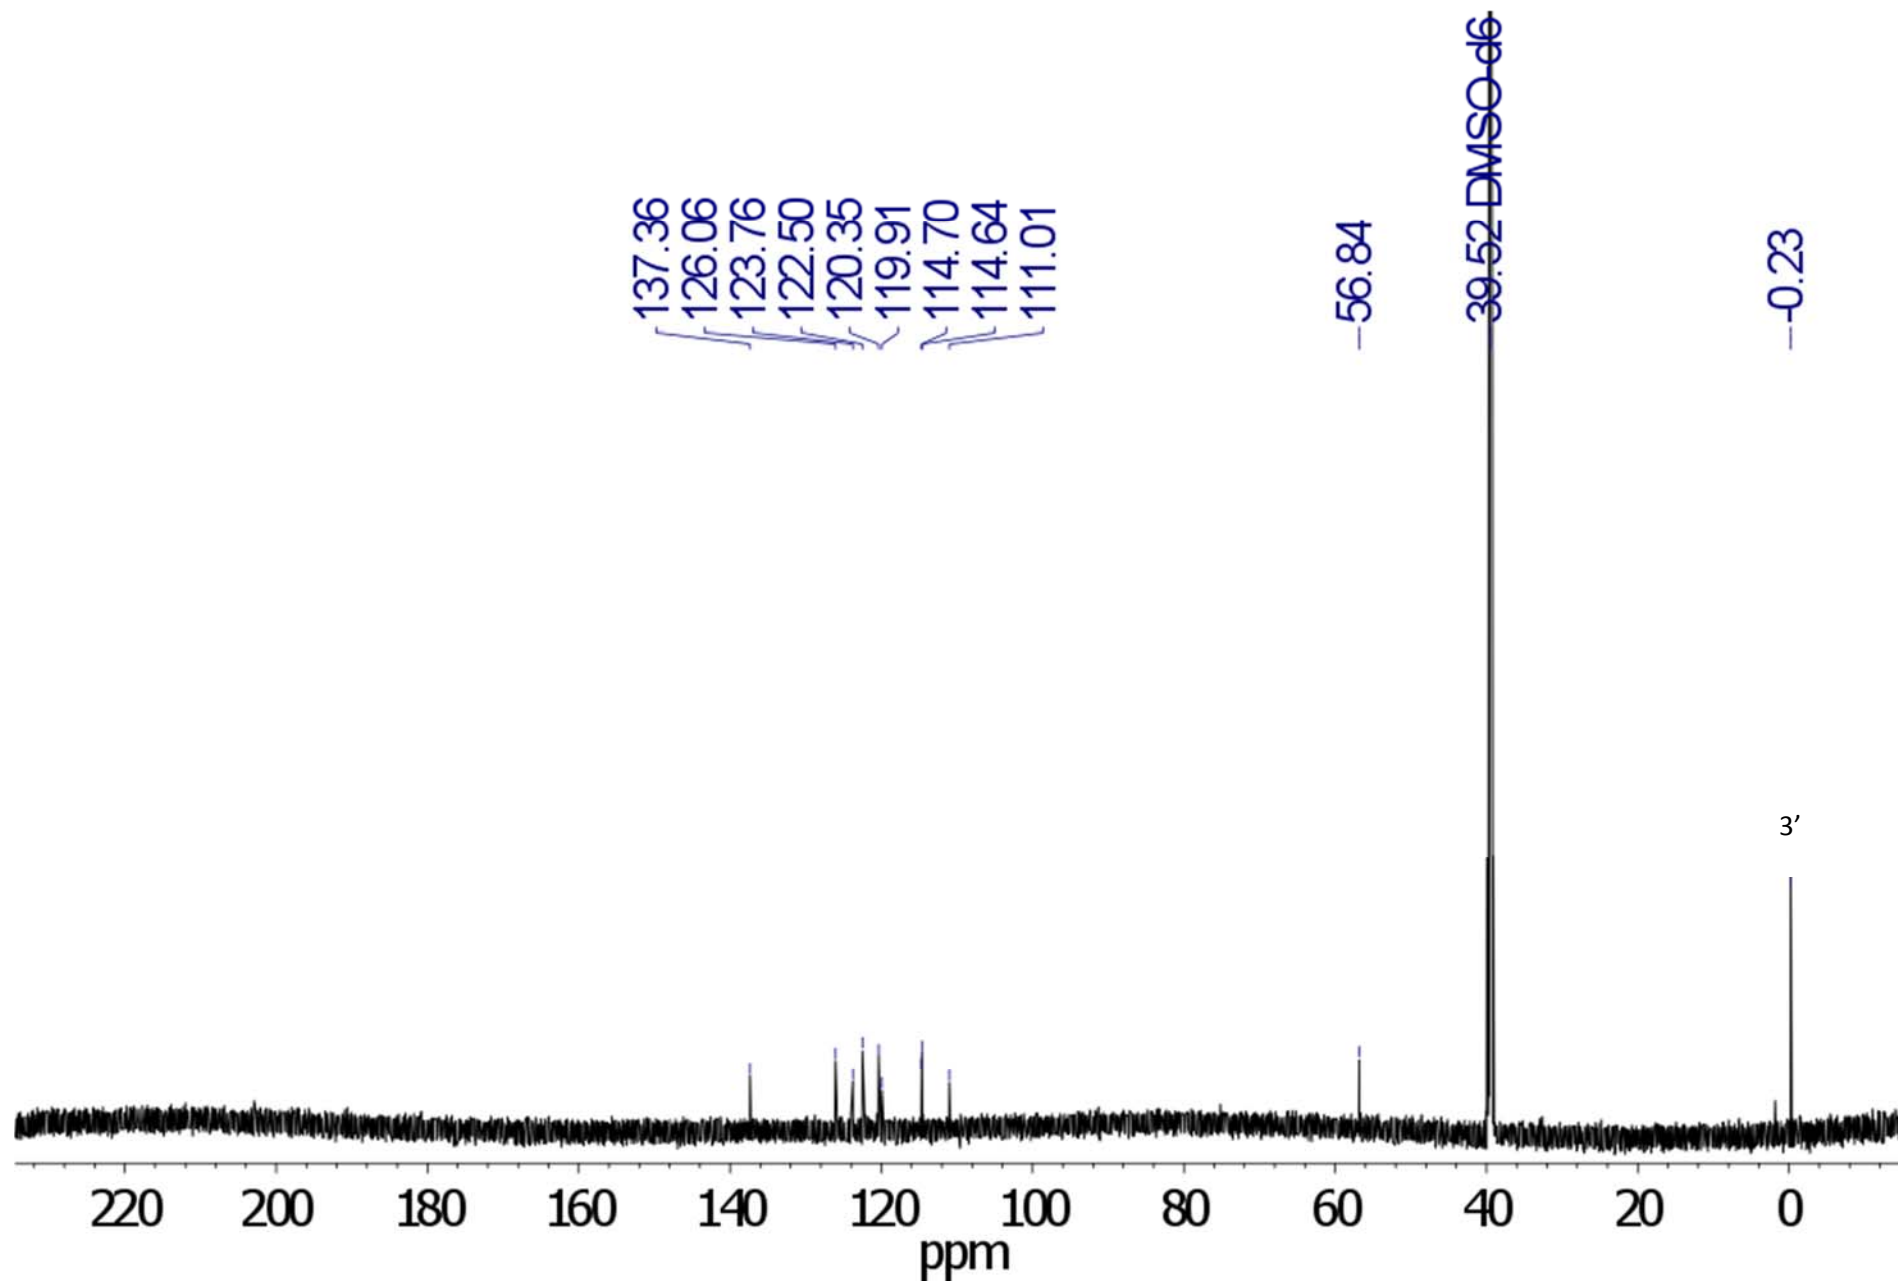



Figure S15. <sup>1</sup>H spectrum (600 MHz) of 6-bromo-1H-indol-3-carbonyl cyanide (**9**) in DMSO-d<sub>6</sub>.

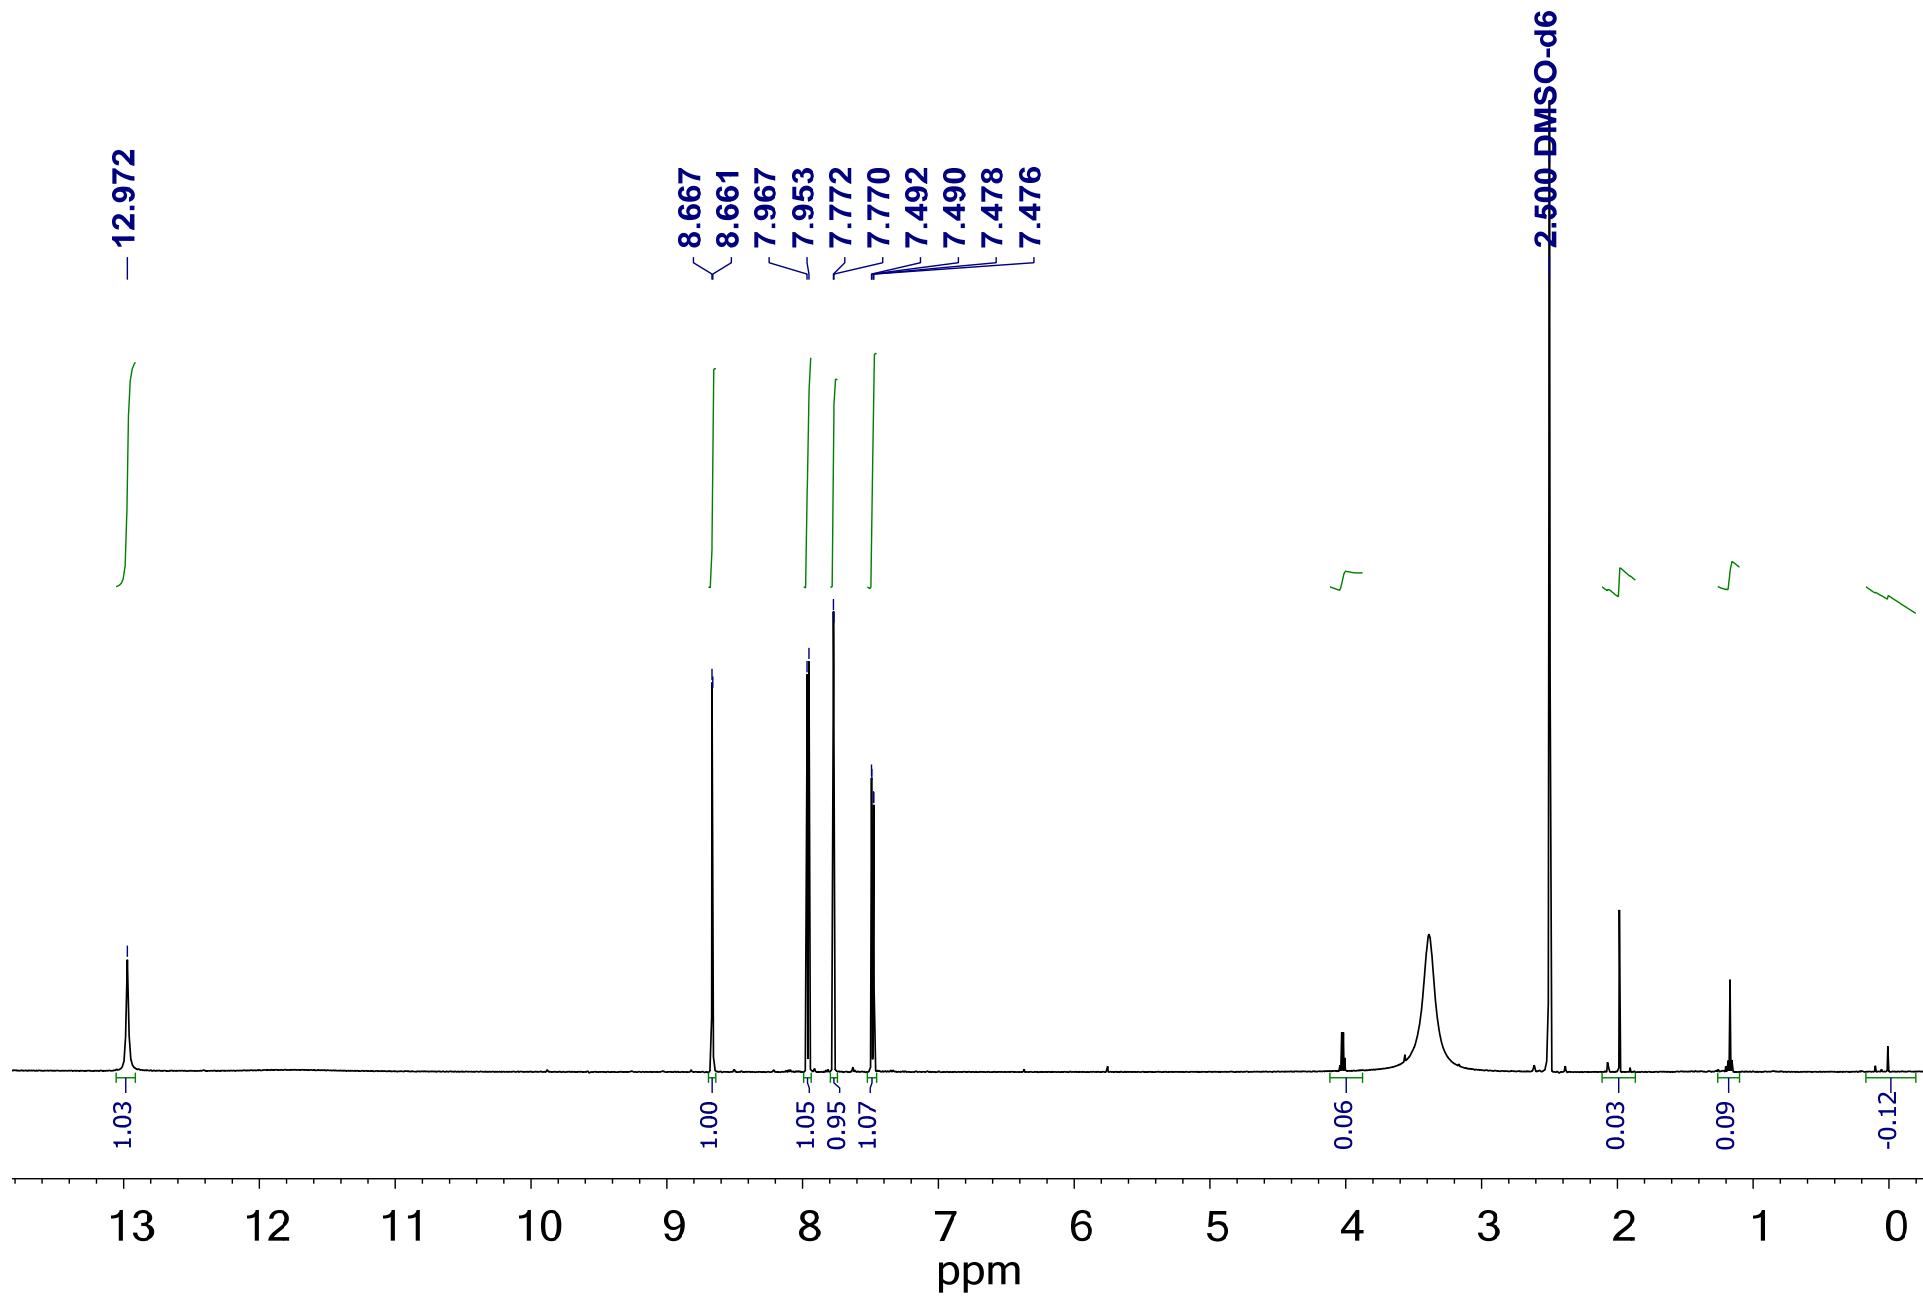

**Figure S16.**  $^{13}\text{C}$  spectrum (150 MHz) of 6-bromo-1H-indol-3-carbonyl cyanide (**9**) in DMSO- $d_6$ . Unmarked peaks are putatively of reduced DDQ (predicted  $^{13}\text{C}$  NMR: 151.5, 129.0, 113.5, 102.8 via nmrdb.org) or other aprotic contaminants as there are no associated proton signals (see above). However rigorous assignment was not done at this stage.

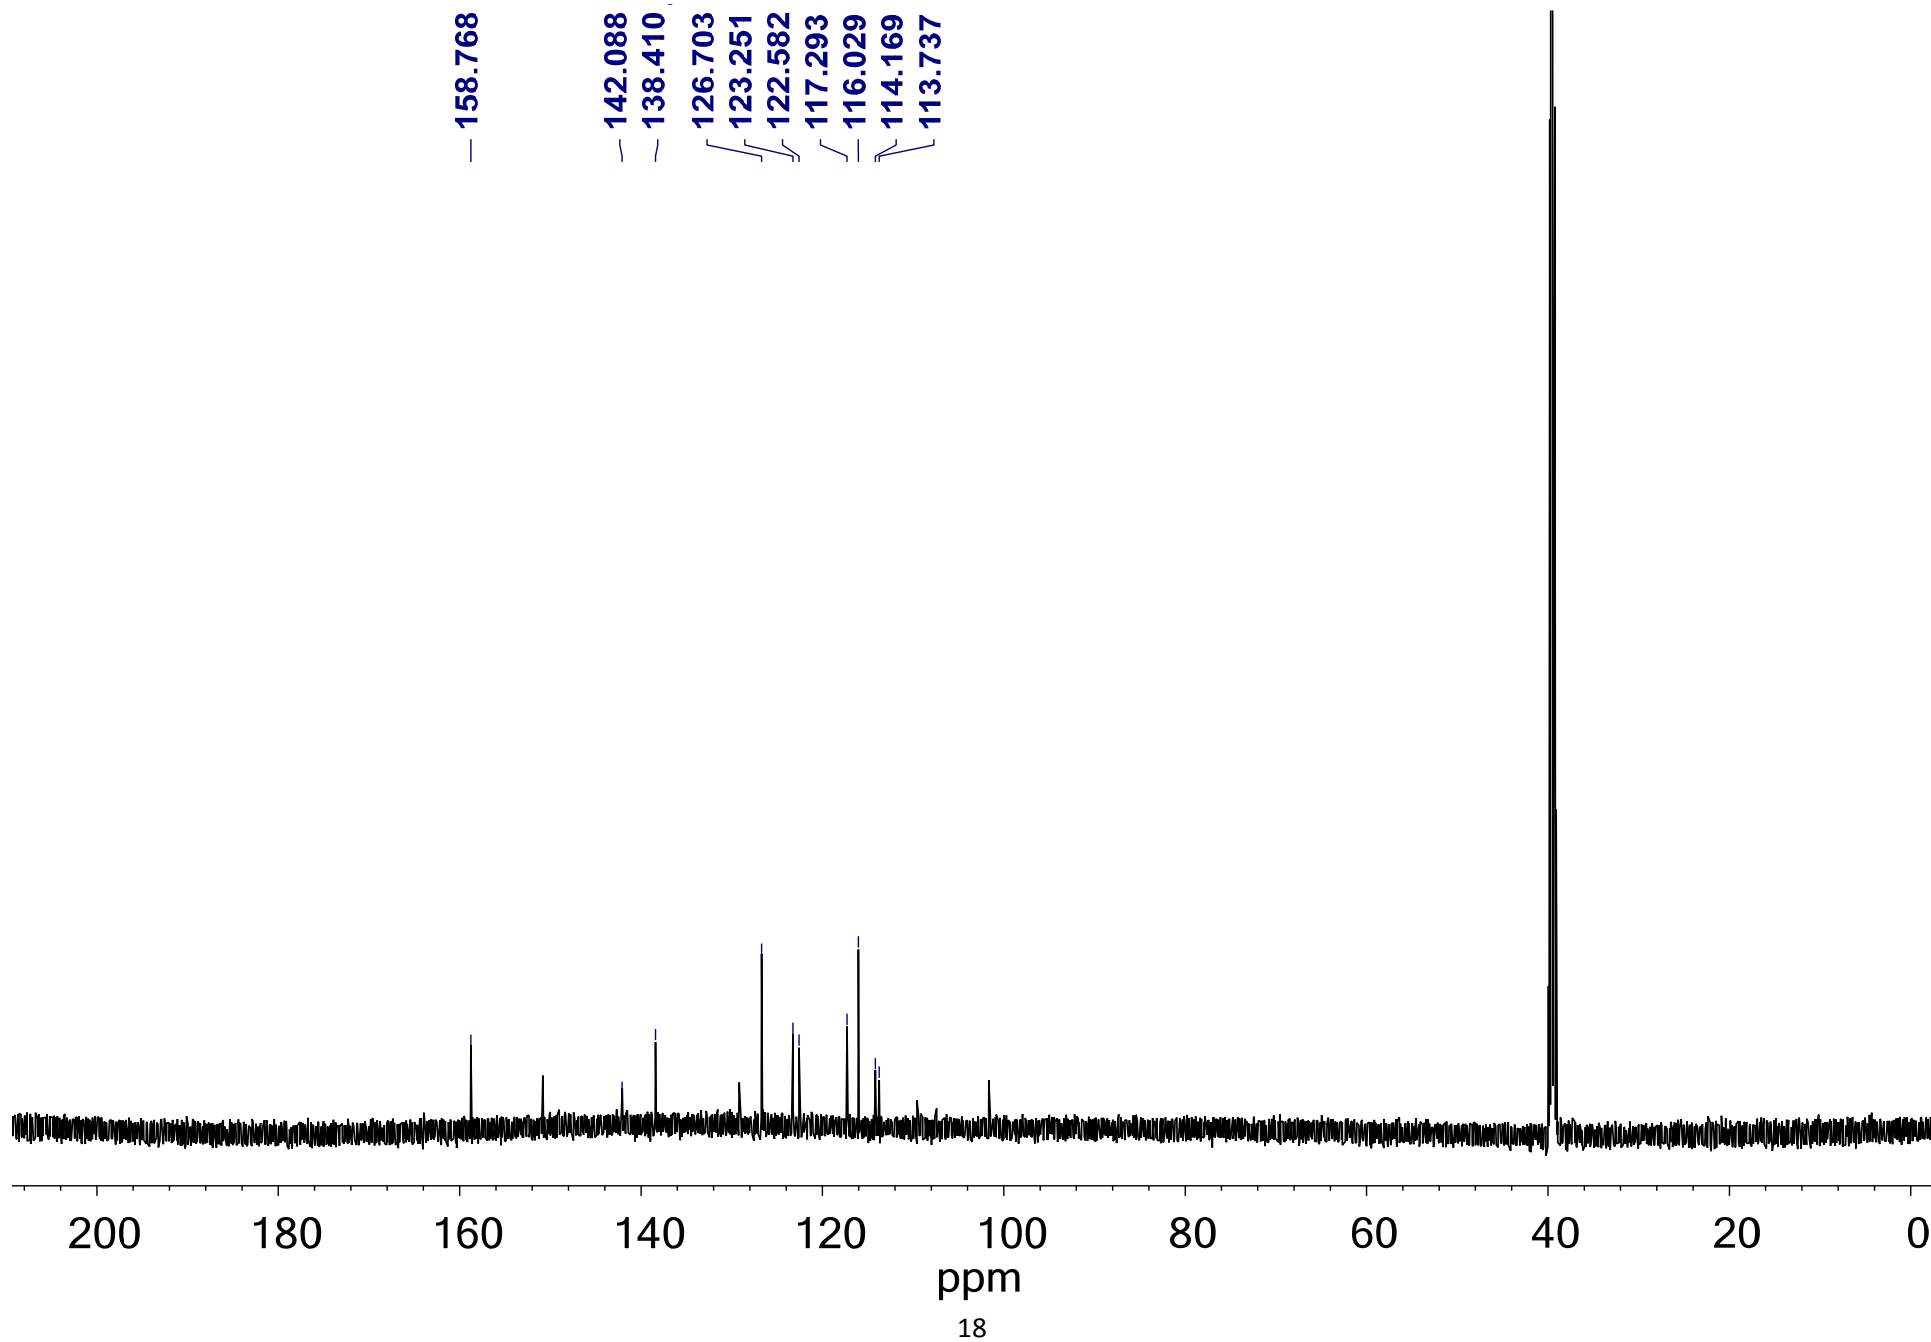

Figure S17.  $^1\text{H}$  spectrum (600 MHz) of 8-keto-tryptamine (**10**) in DMSO- $d_6$ .

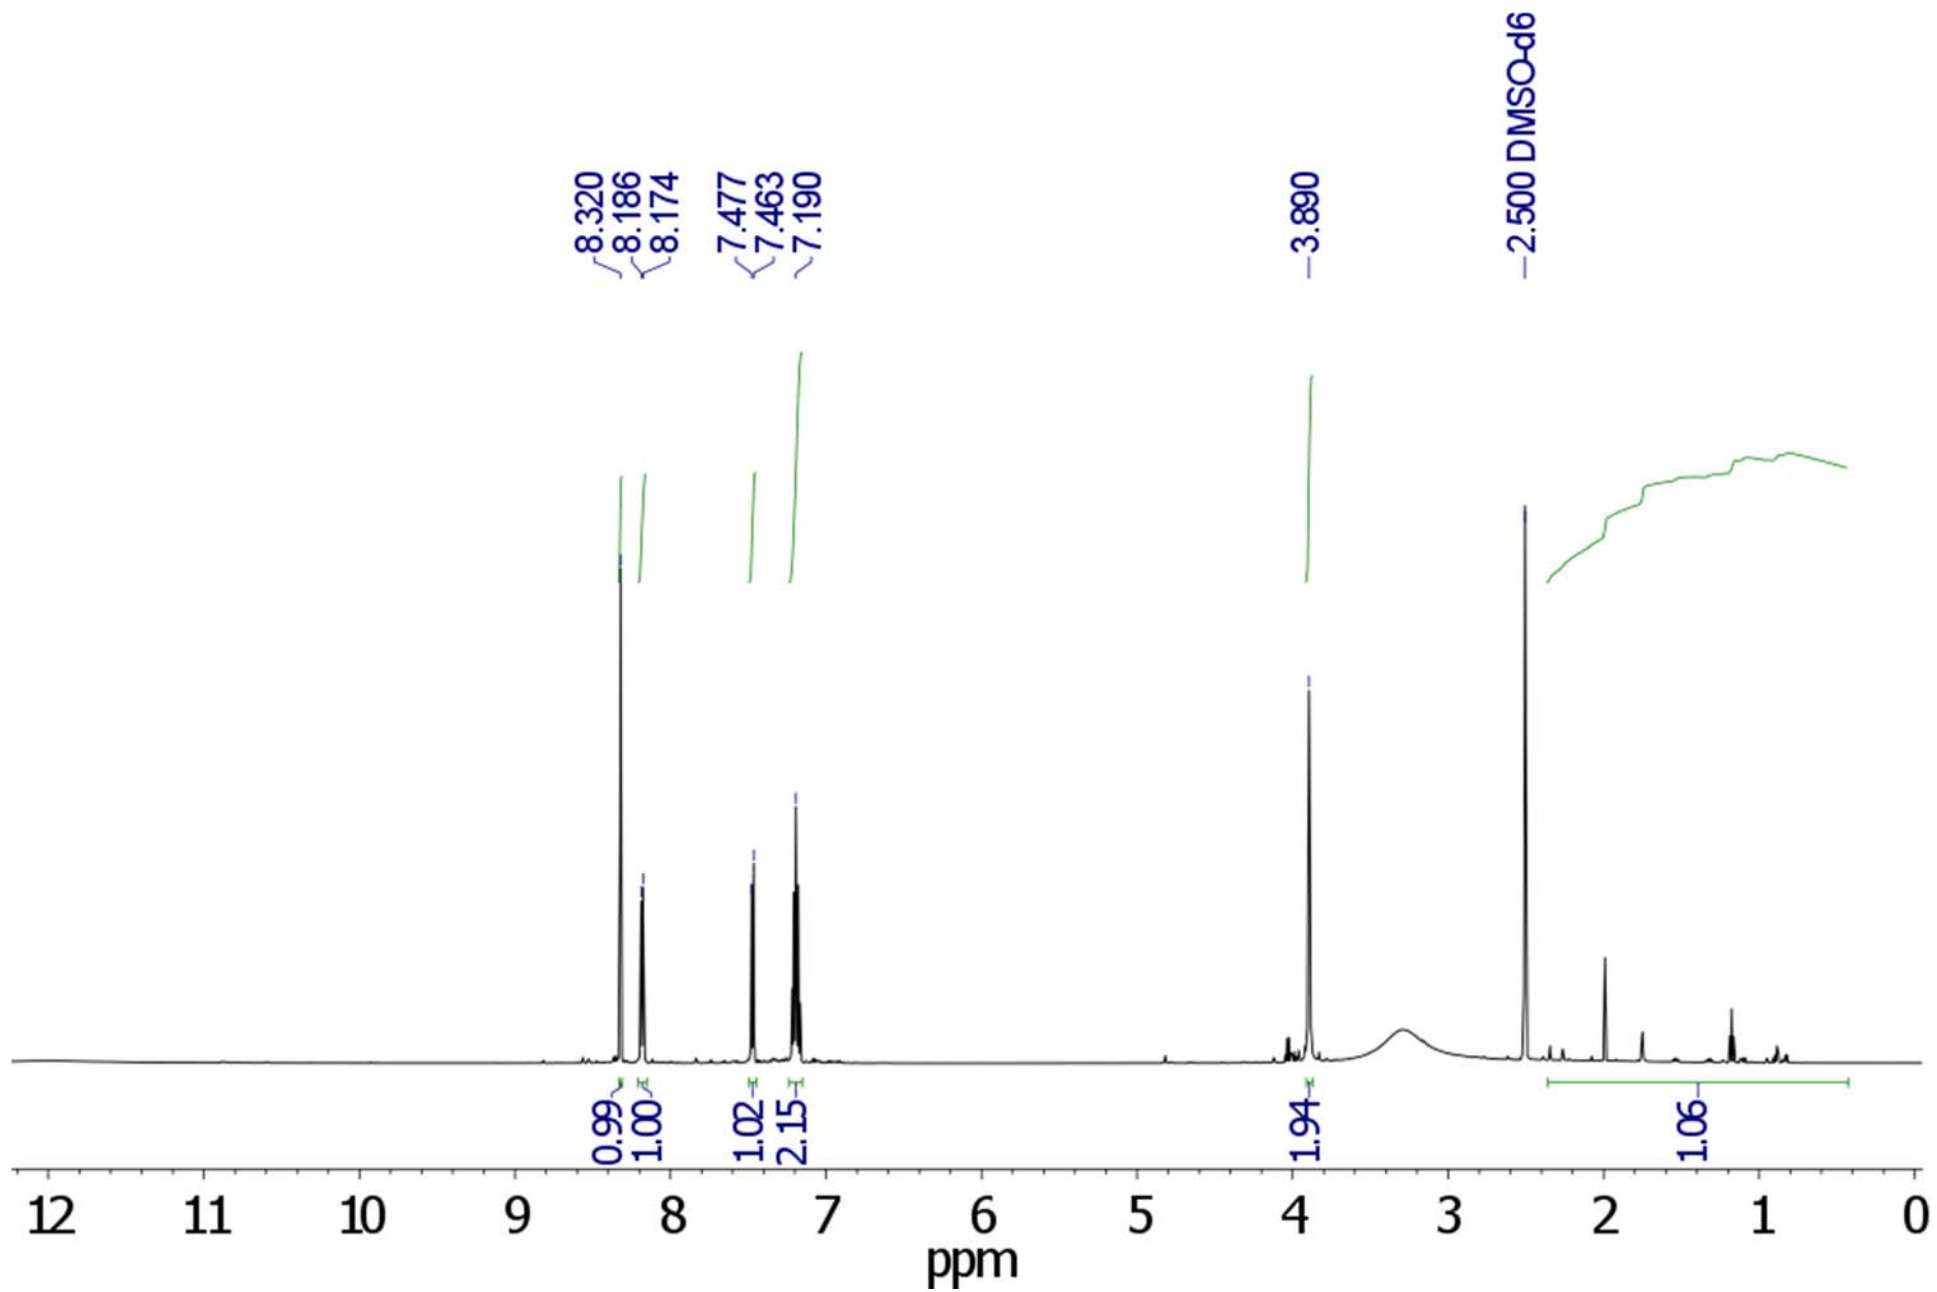

Figure S18.  $^{13}\text{C}$  spectrum (150 MHz) of 8-keto-tryptamine (**10**) in DMSO- $d_6$ .

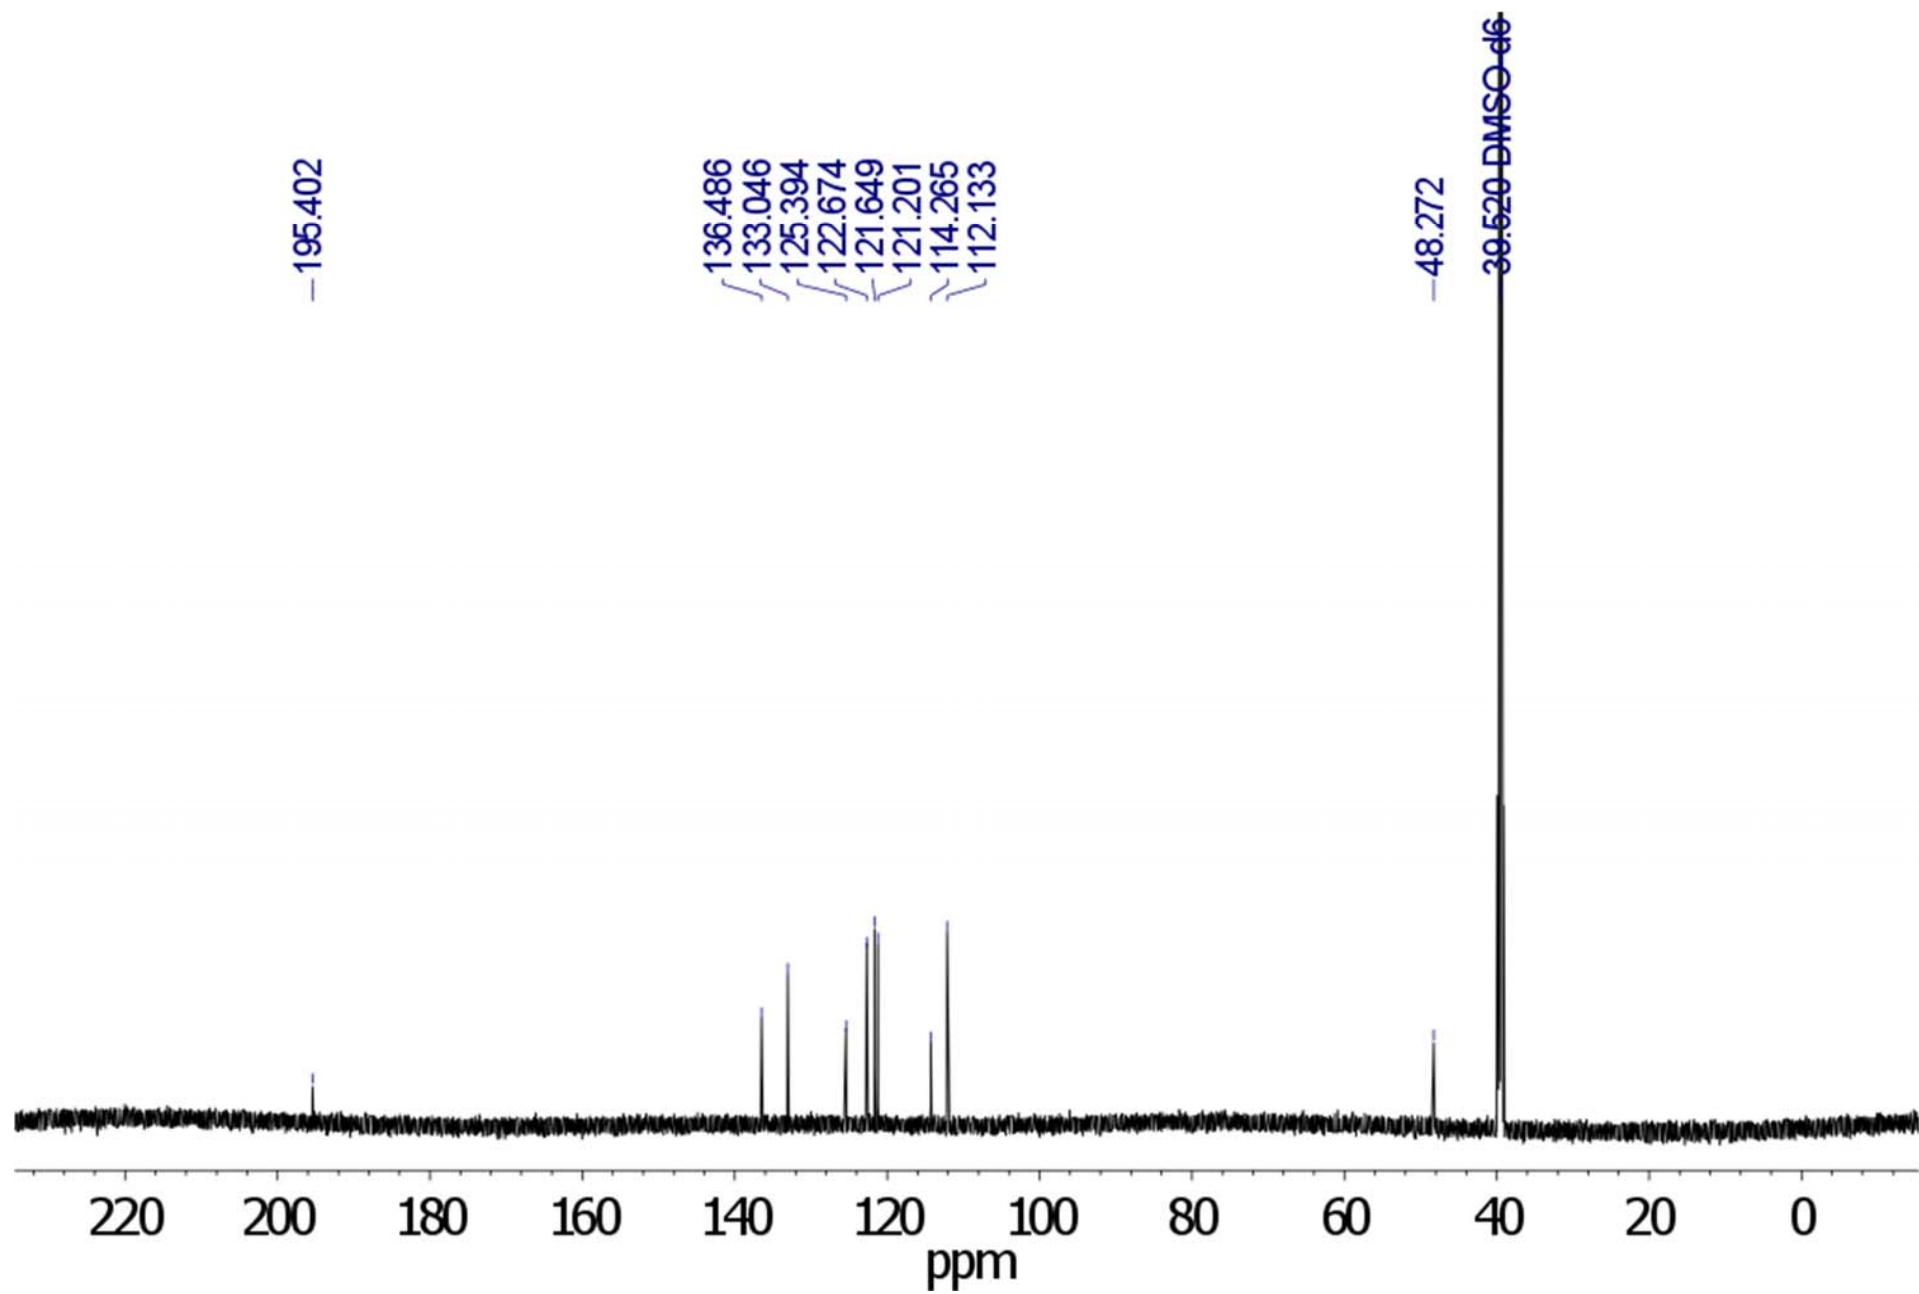

Figure S19.  $^1\text{H}$  spectrum (500 MHz) of 6-Br-8-keto-tryptamine (**11**) (formate salt) in DMSO- $d_6$ .

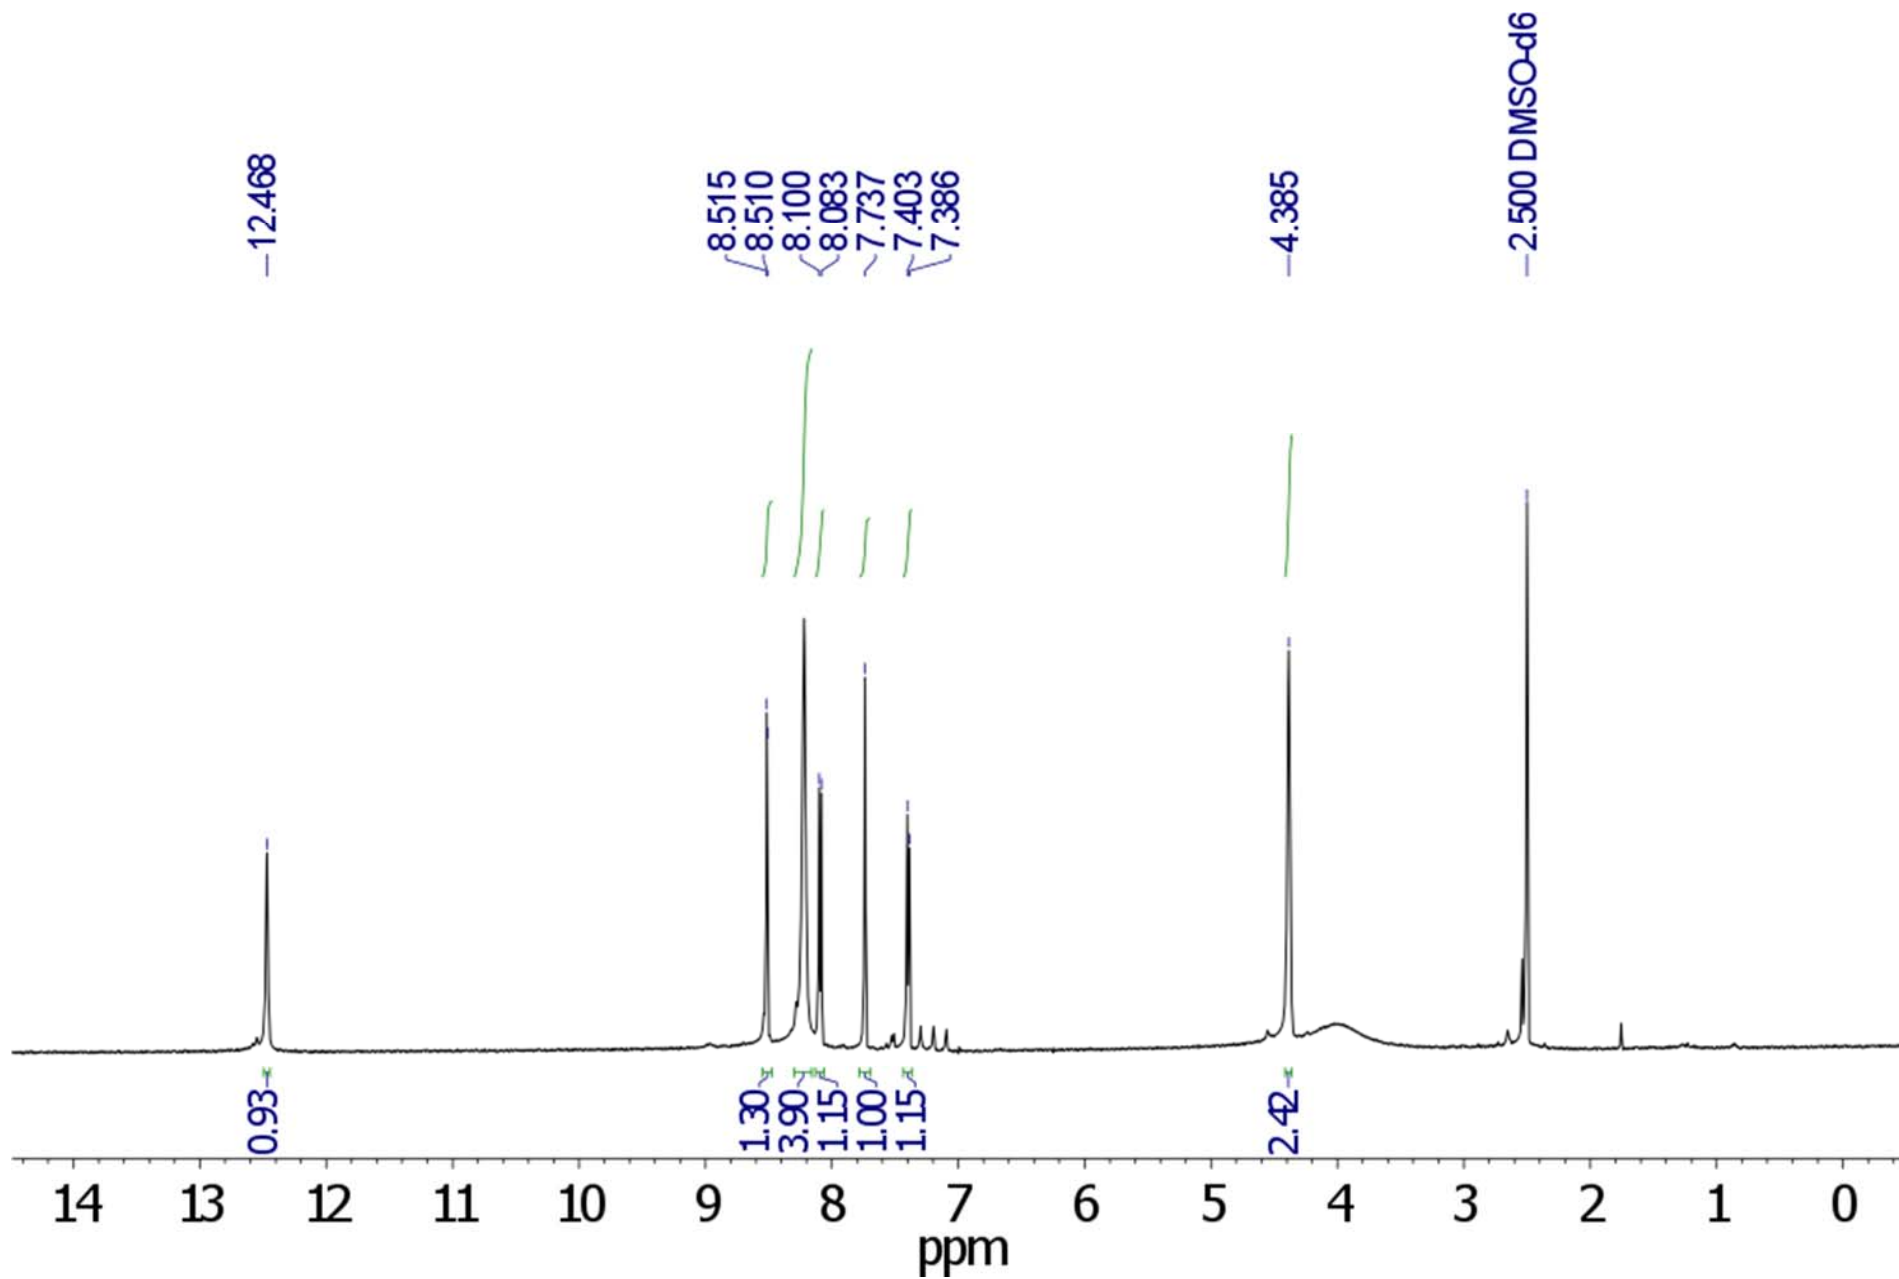

Figure S20.  $^{13}\text{C}$  spectrum (125 MHz) of 6-Br-8-keto-tryptamine (**11**) in DMSO- $d_6$ .

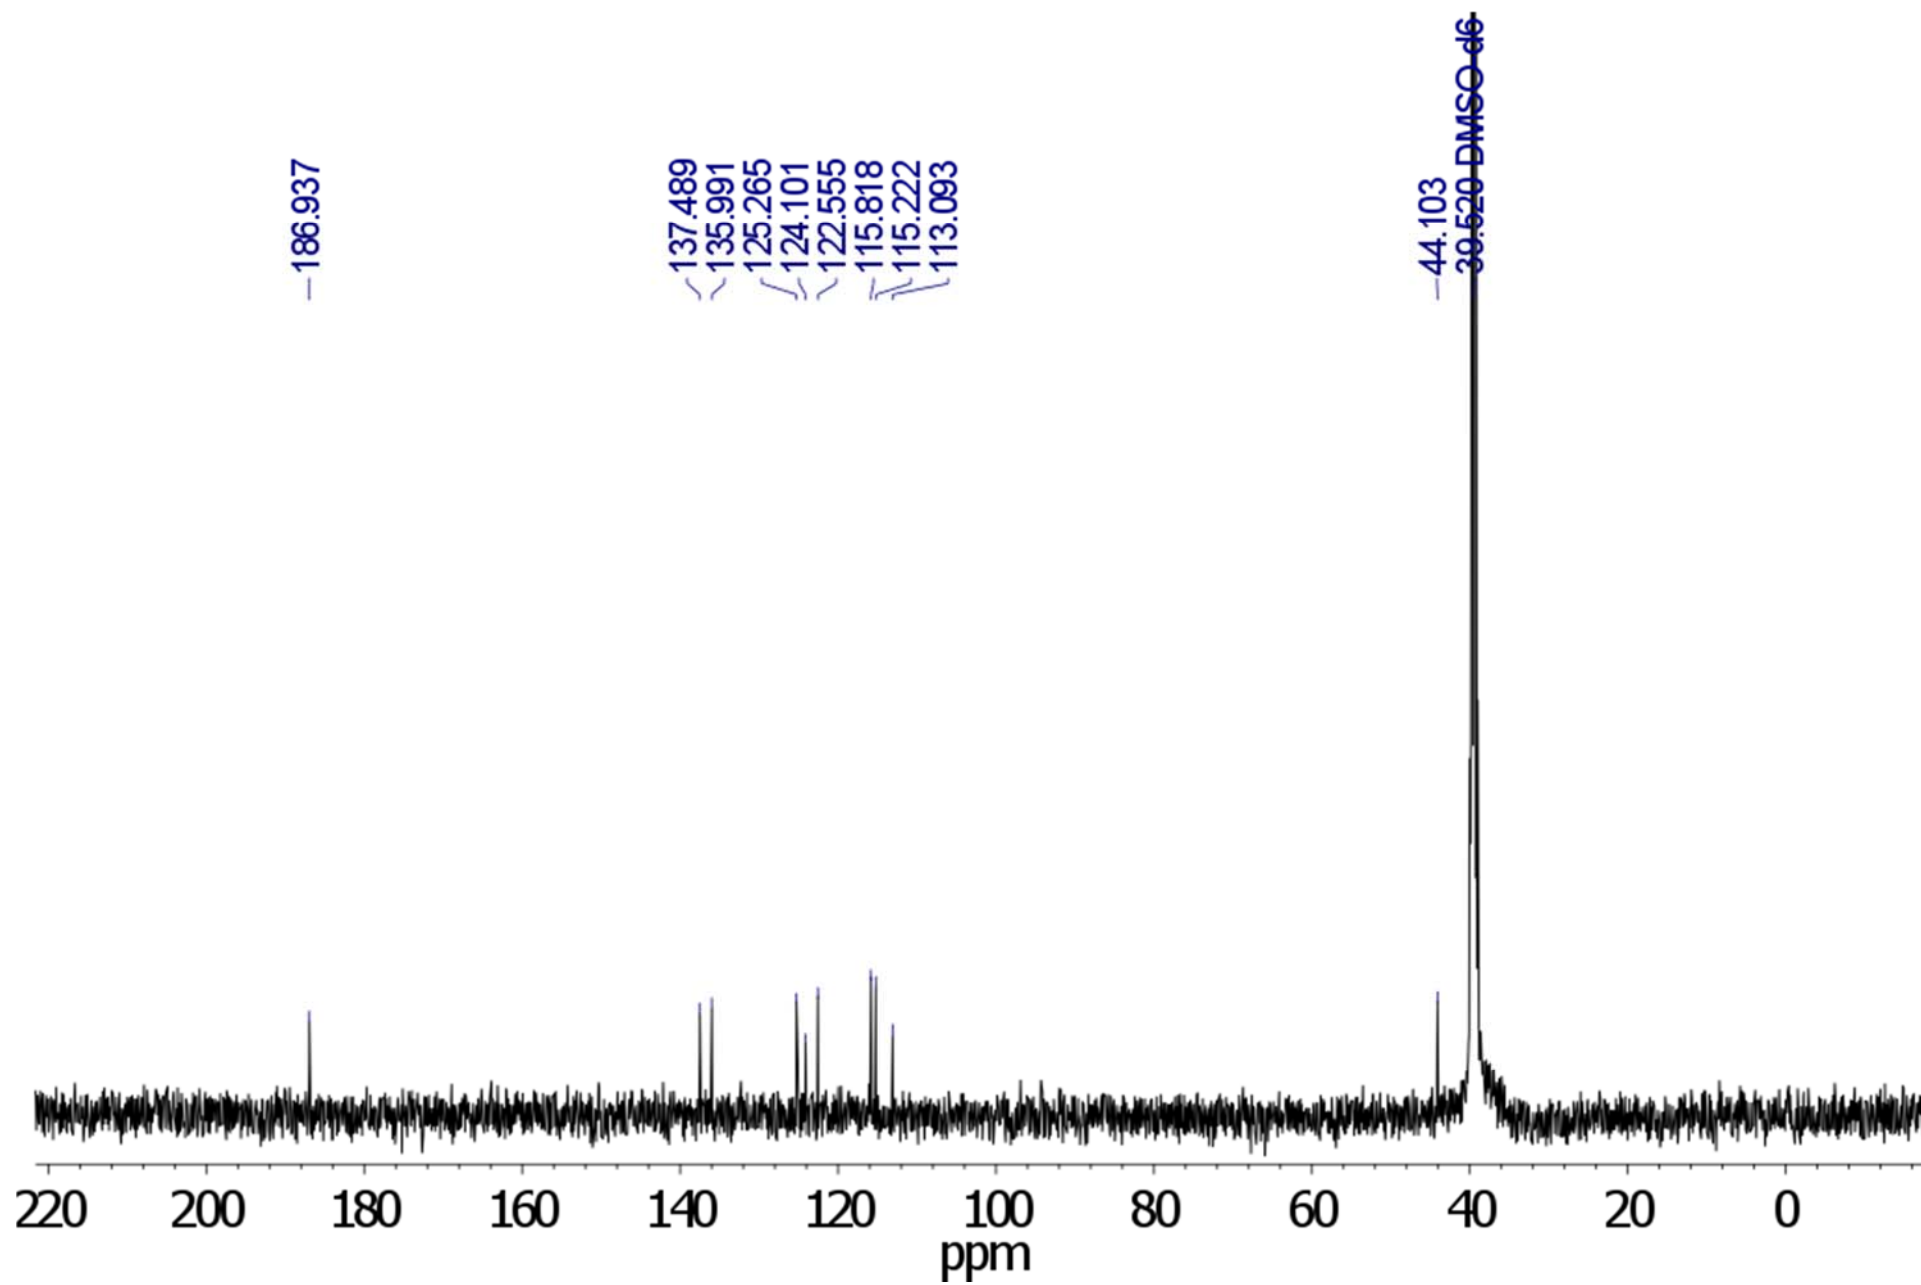

Figure S21.  $^1\text{H}$  spectrum (500 MHz) of 5-Br-8-keto-tryptamine (**12**) (formate salt) in DMSO- $d_6$ .

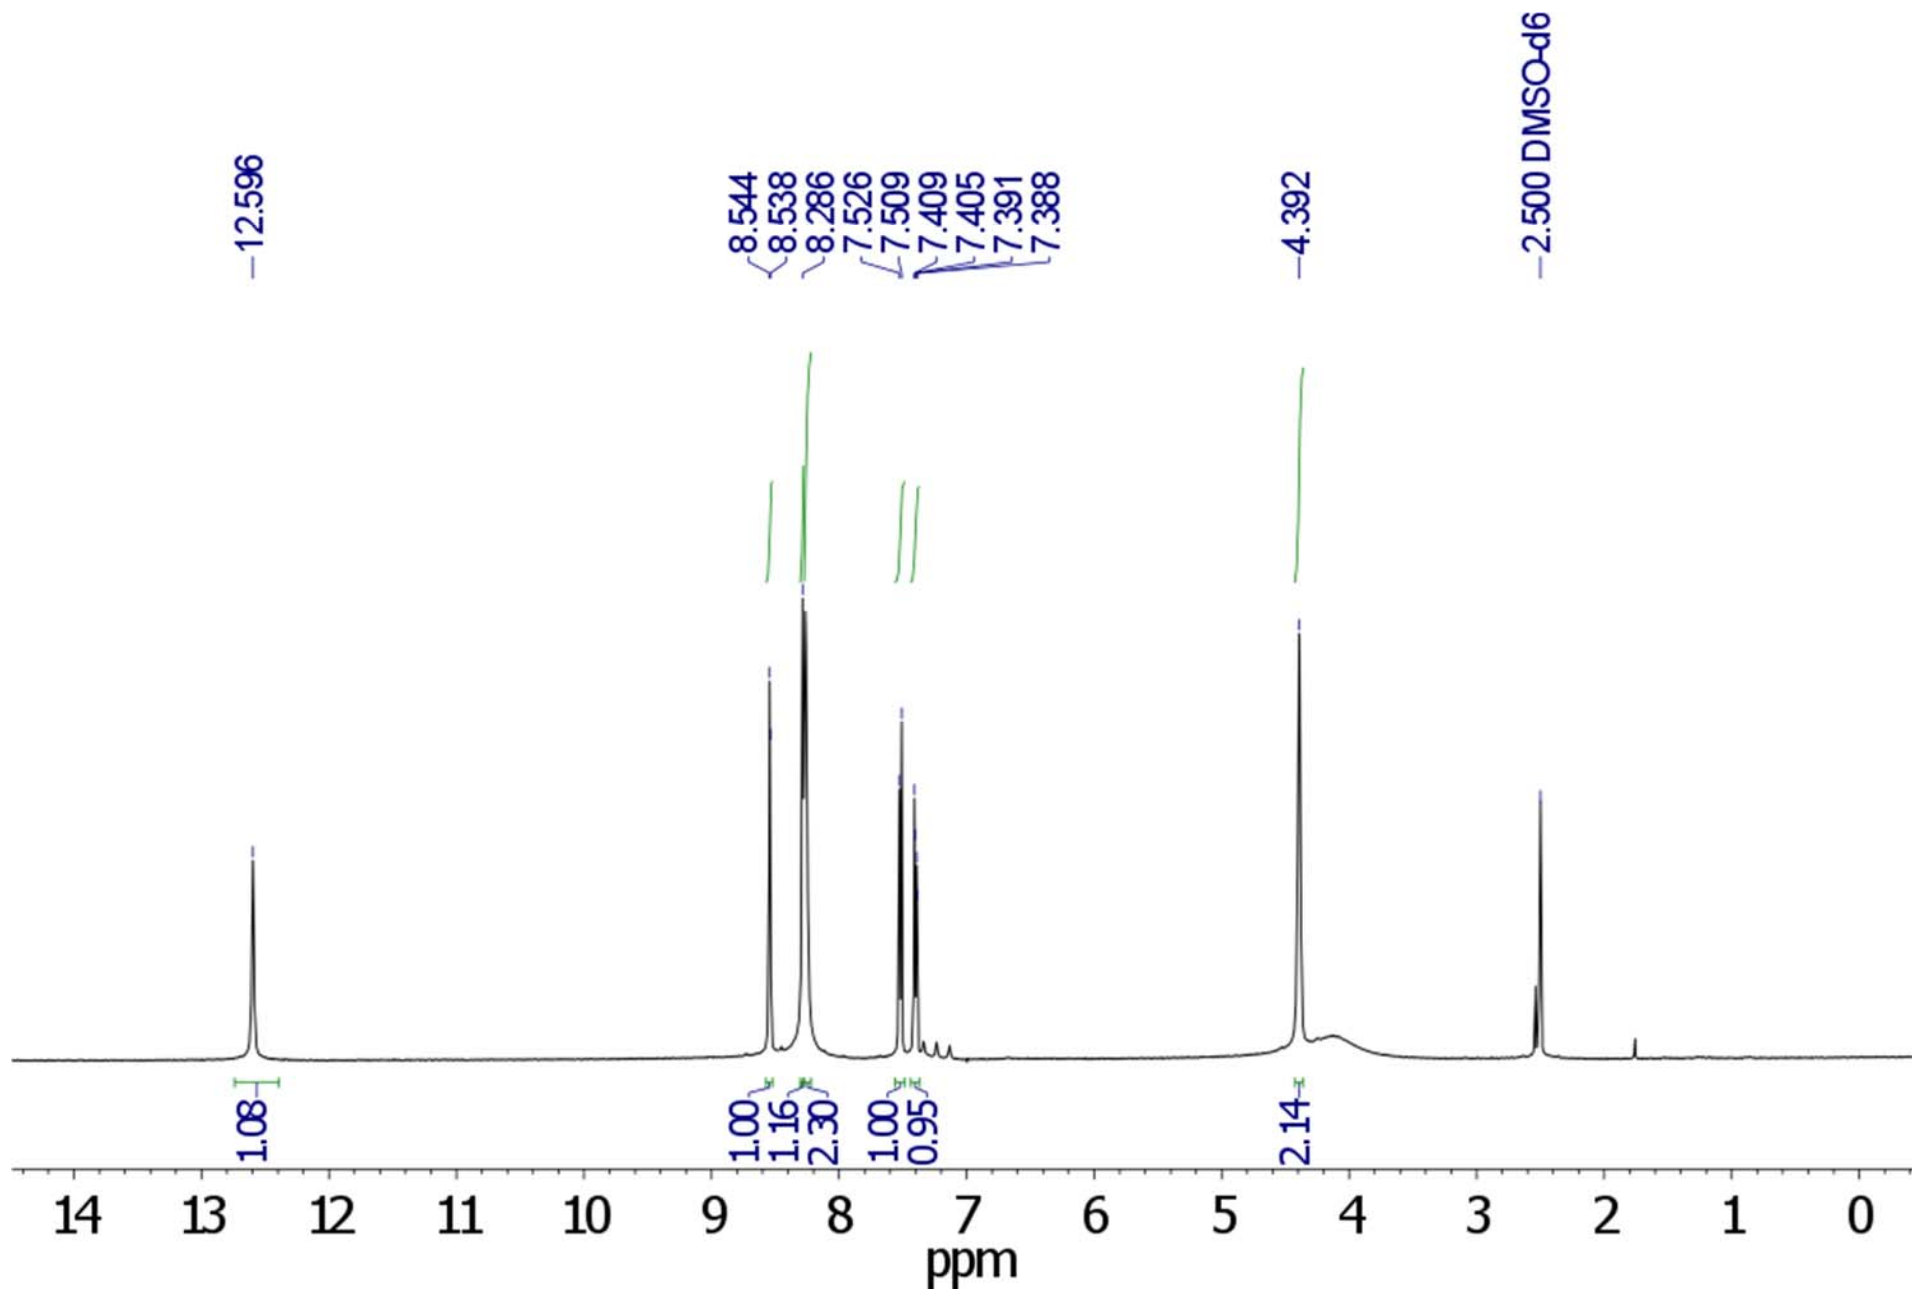

Figure S22.  $^{13}\text{C}$  spectrum (125 MHz) of 5-Br-8-keto-tryptamine (**12**) in DMSO- $d_6$ .

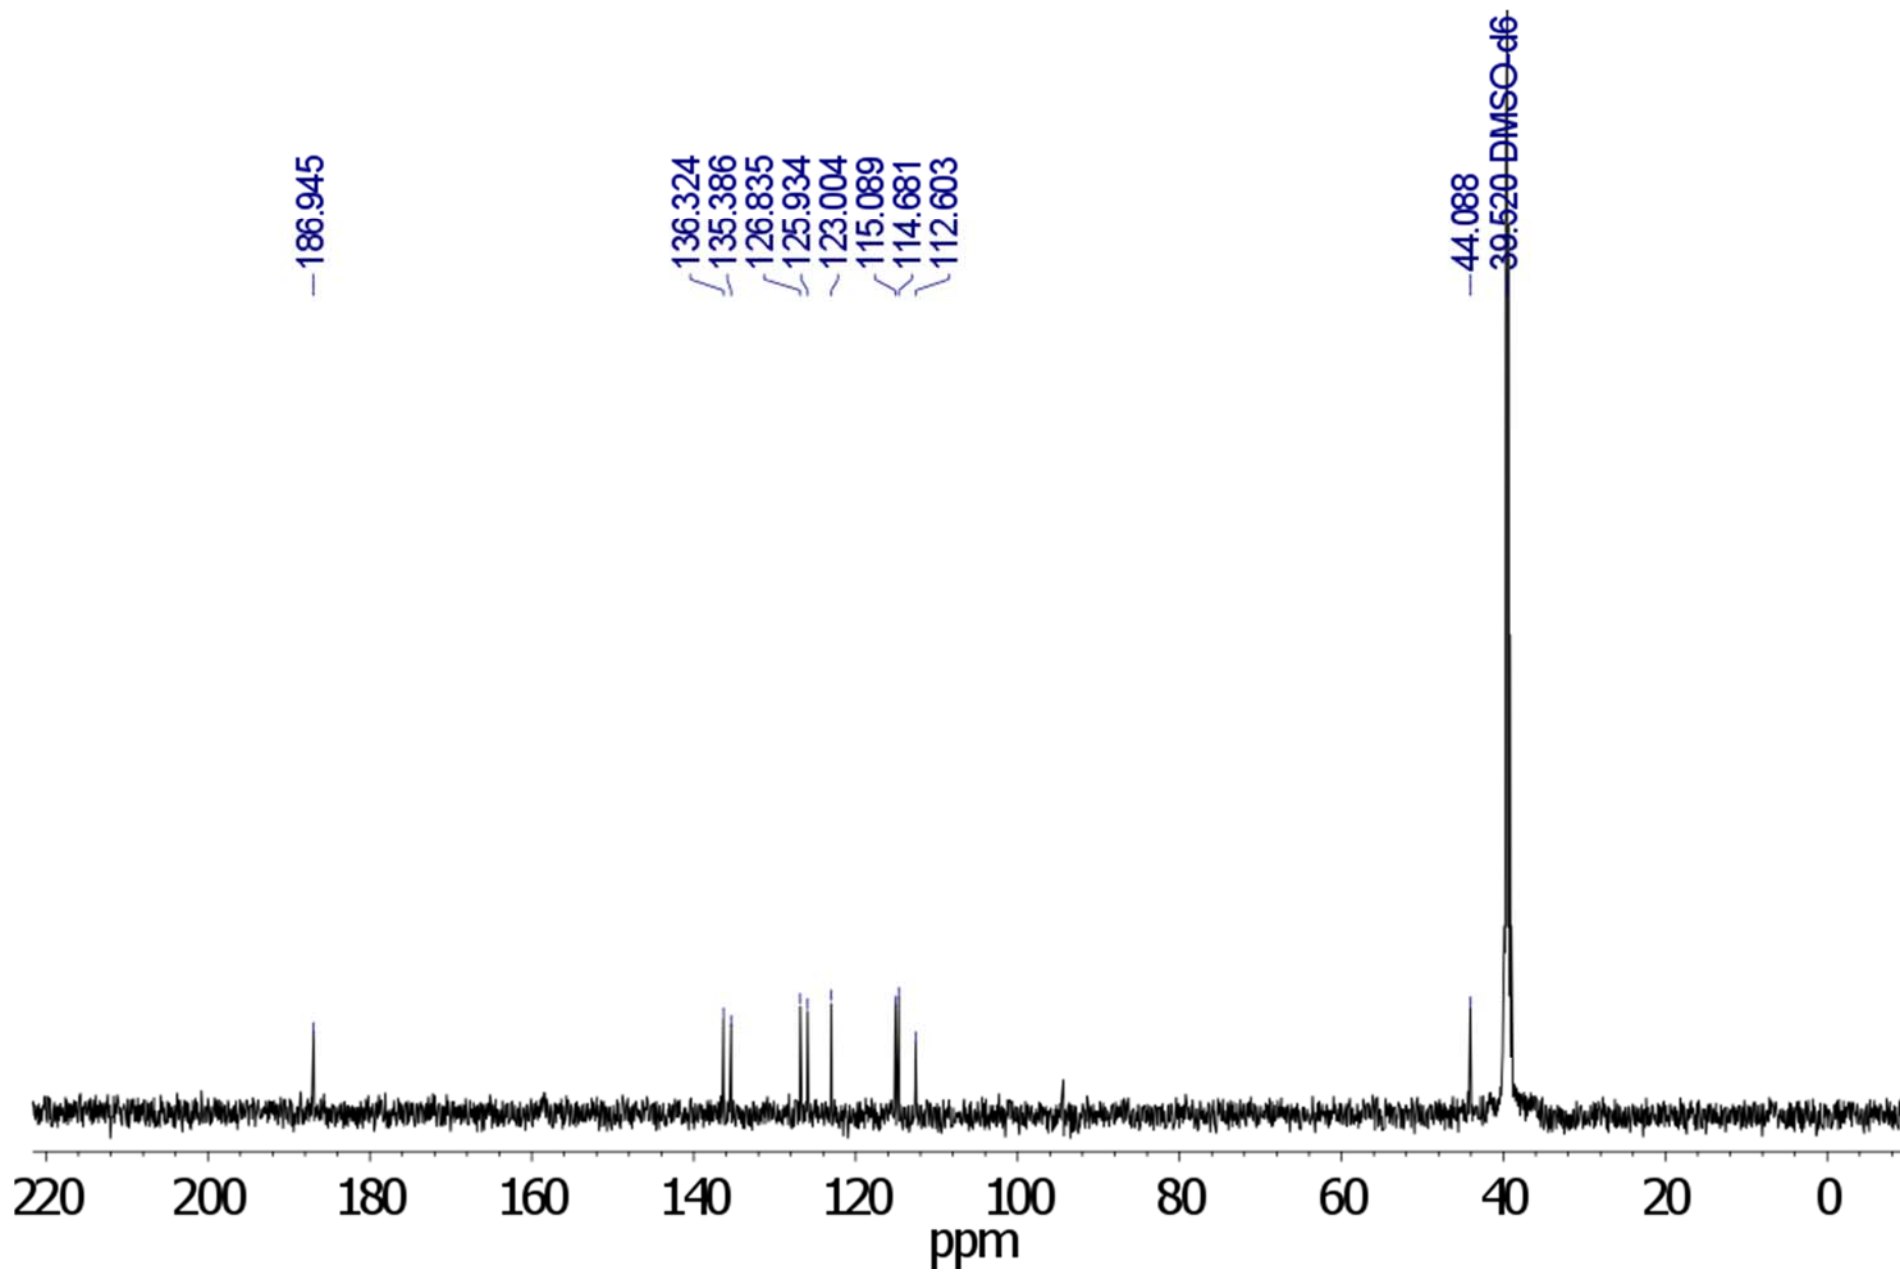



Figure S23. <sup>1</sup>H spectrum (600 MHz) of 8-keto-N,N,N-trimethyl-tryptamine (**13**) (formate salt) in DMSO-d<sub>6</sub>.

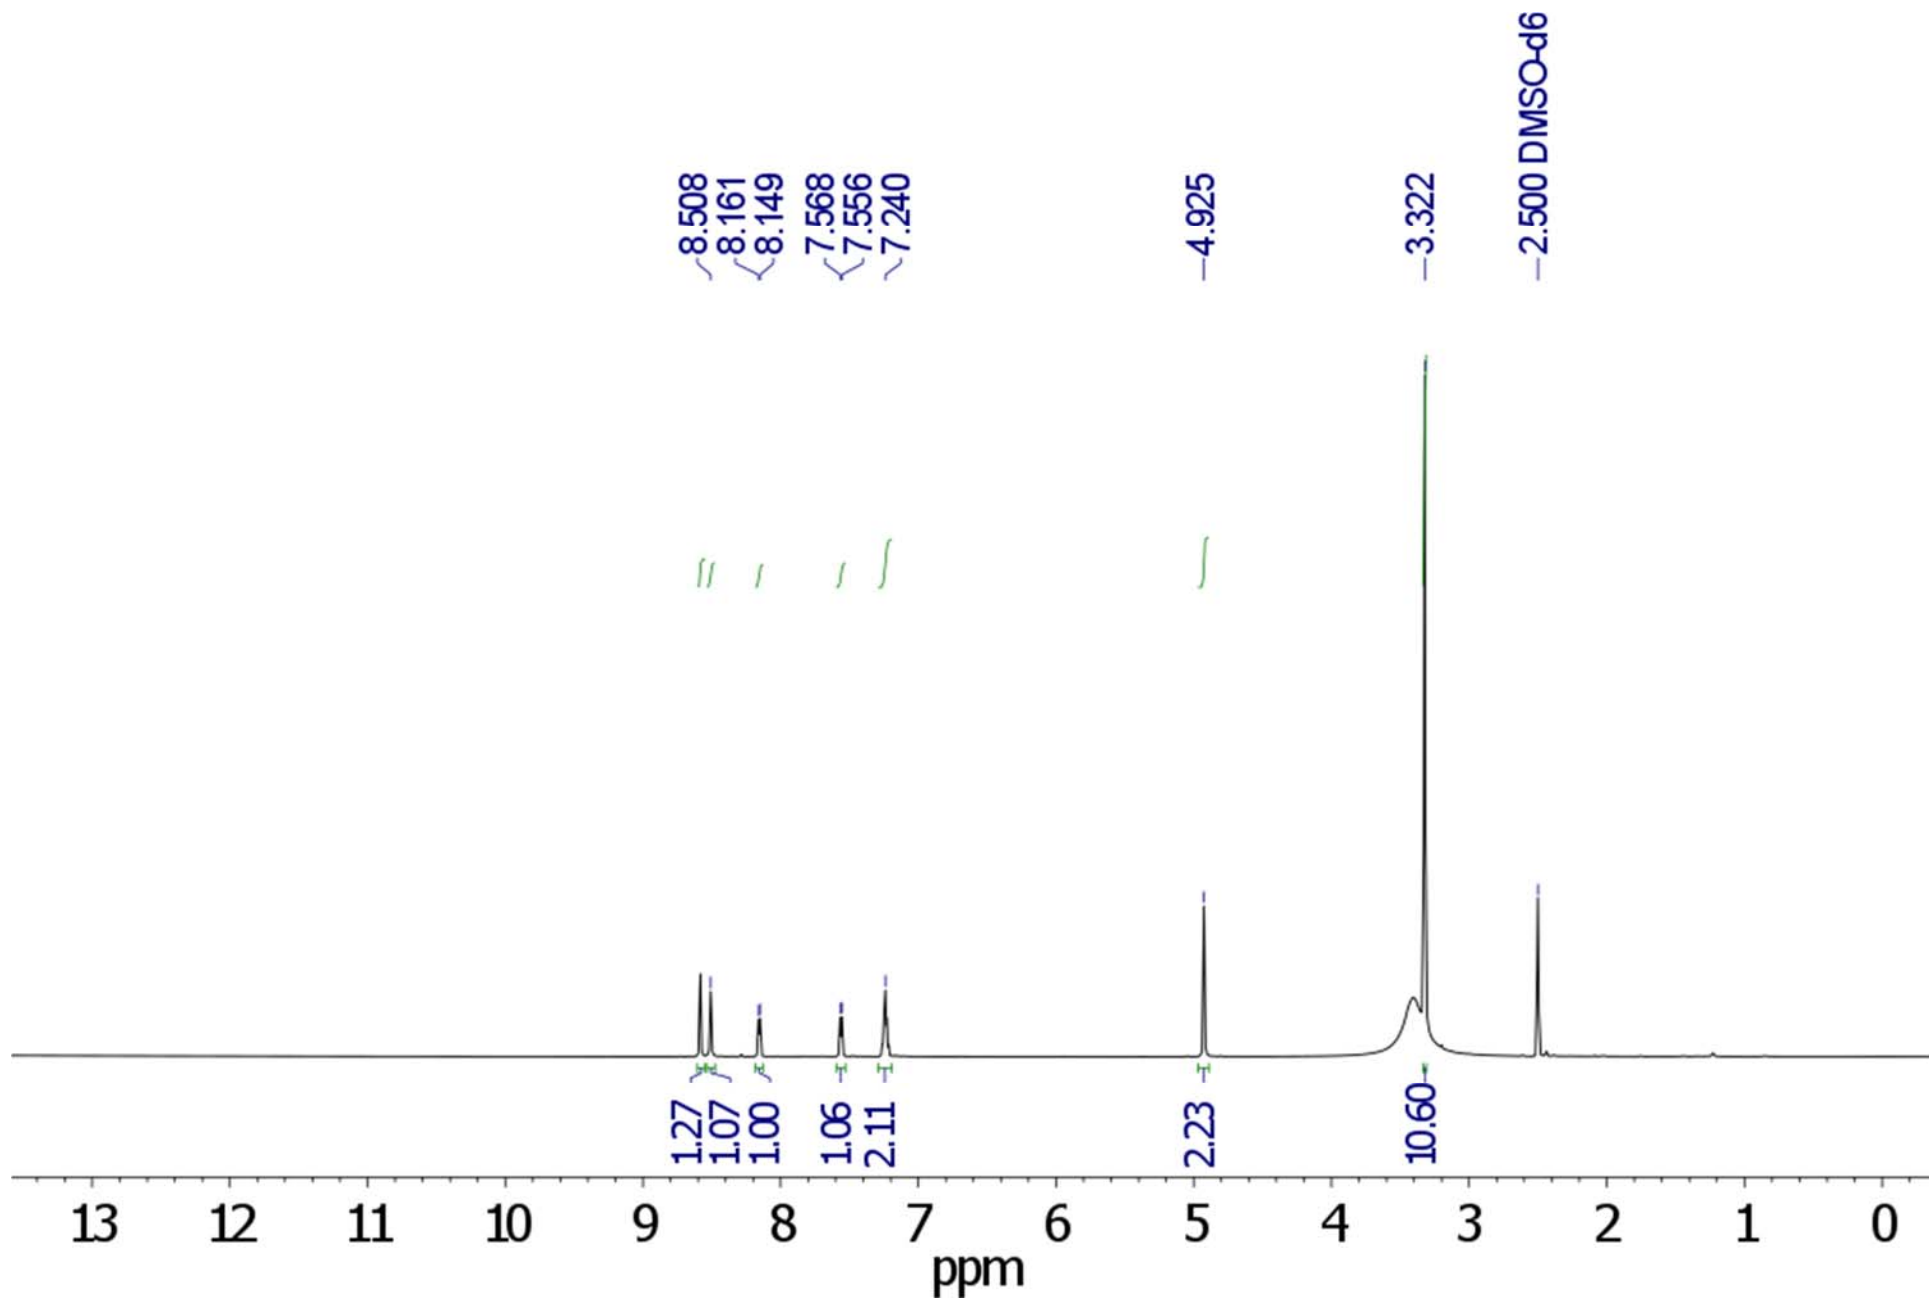

Figure S24.  $^{13}\text{C}$  spectrum (150 MHz) of  $\beta$ -oxo-*N,N,N*-trimethyl-tryptamine (**13**) (formate salt) in DMSO- $d_6$ .

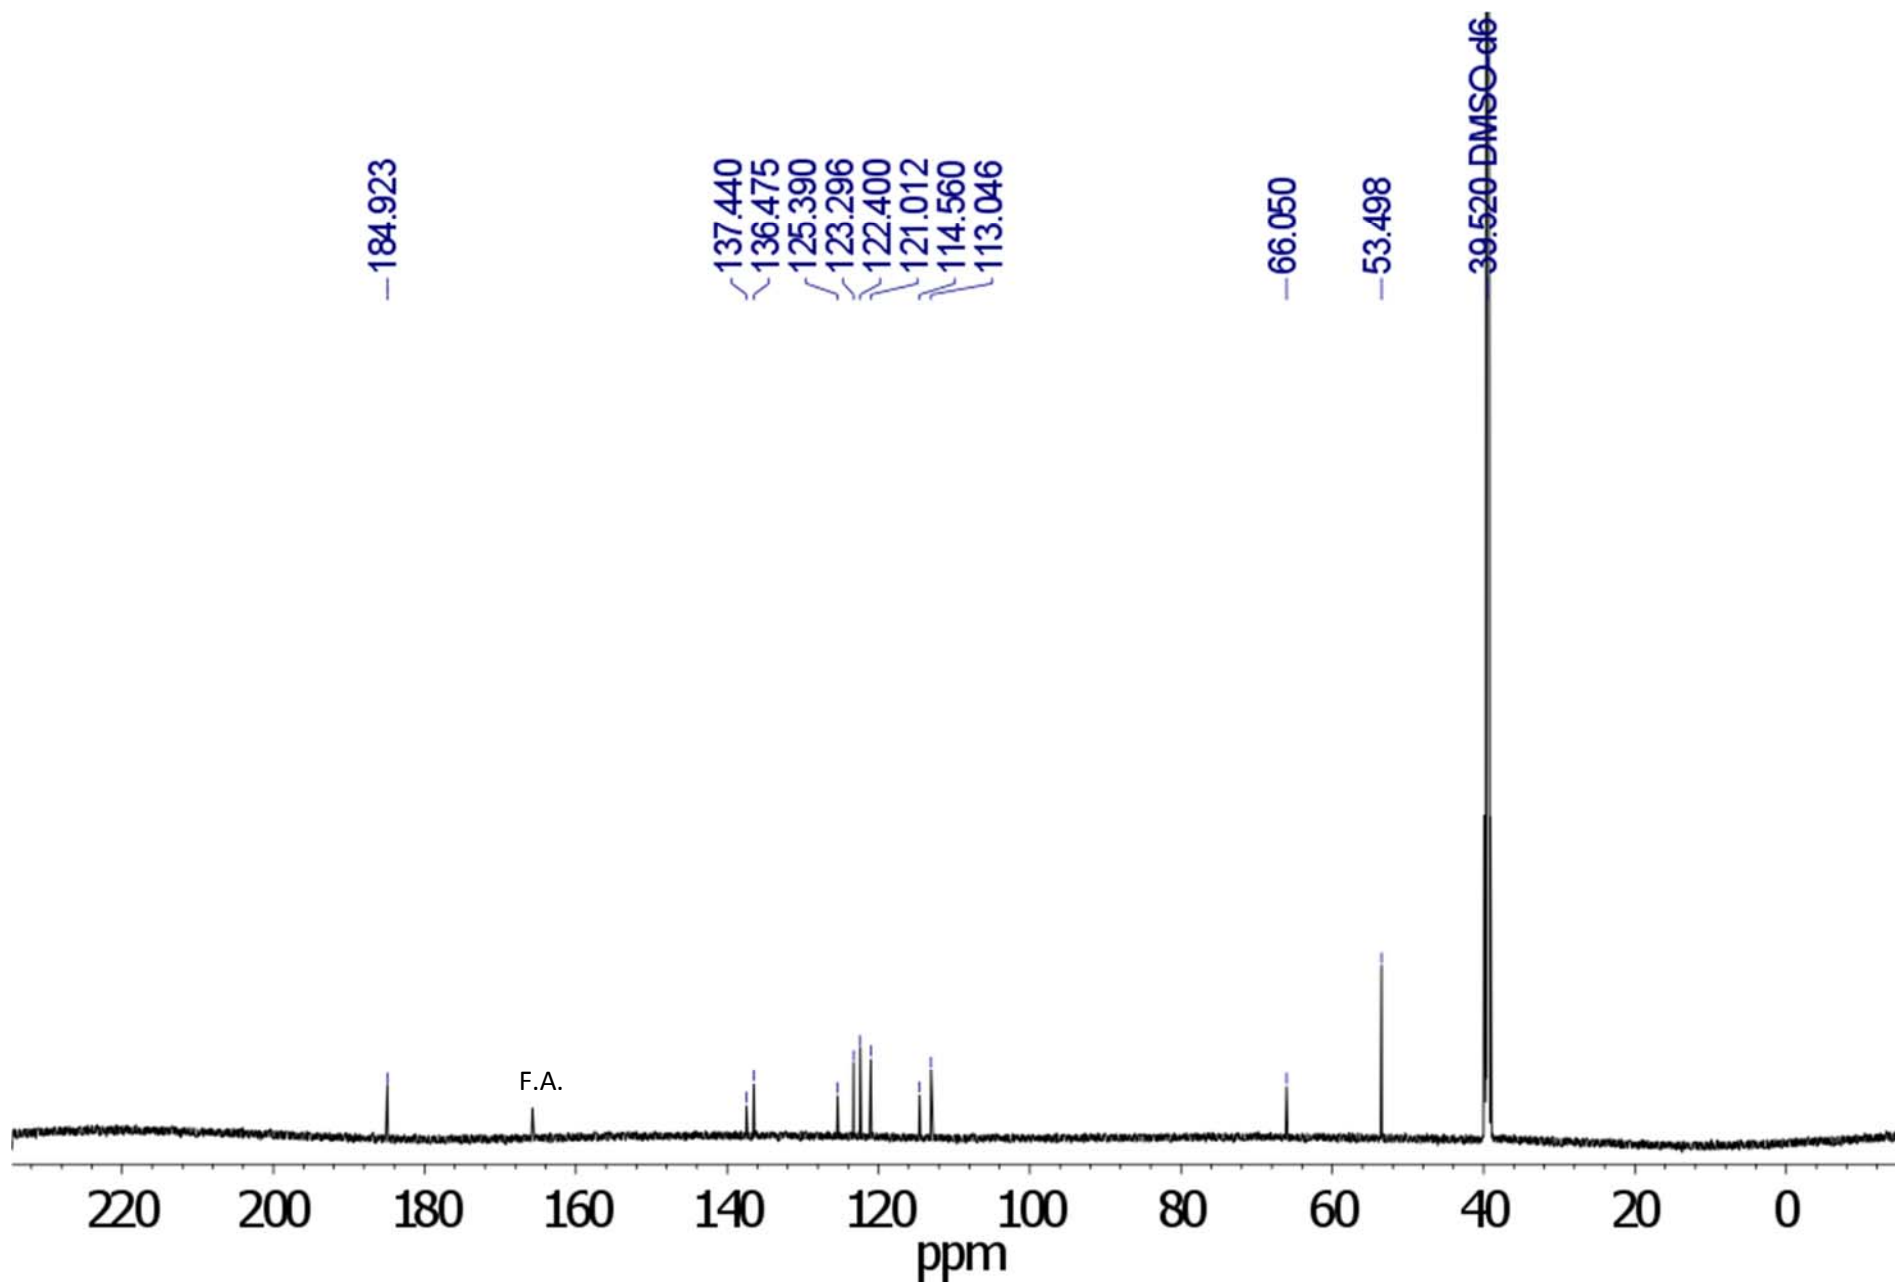

Figure S25. <sup>1</sup>H spectrum (600 MHz) of 6-Br-8-keto-*N,N*-dimethyl-tryptamine (**14**) in DMSO-d<sub>6</sub>.

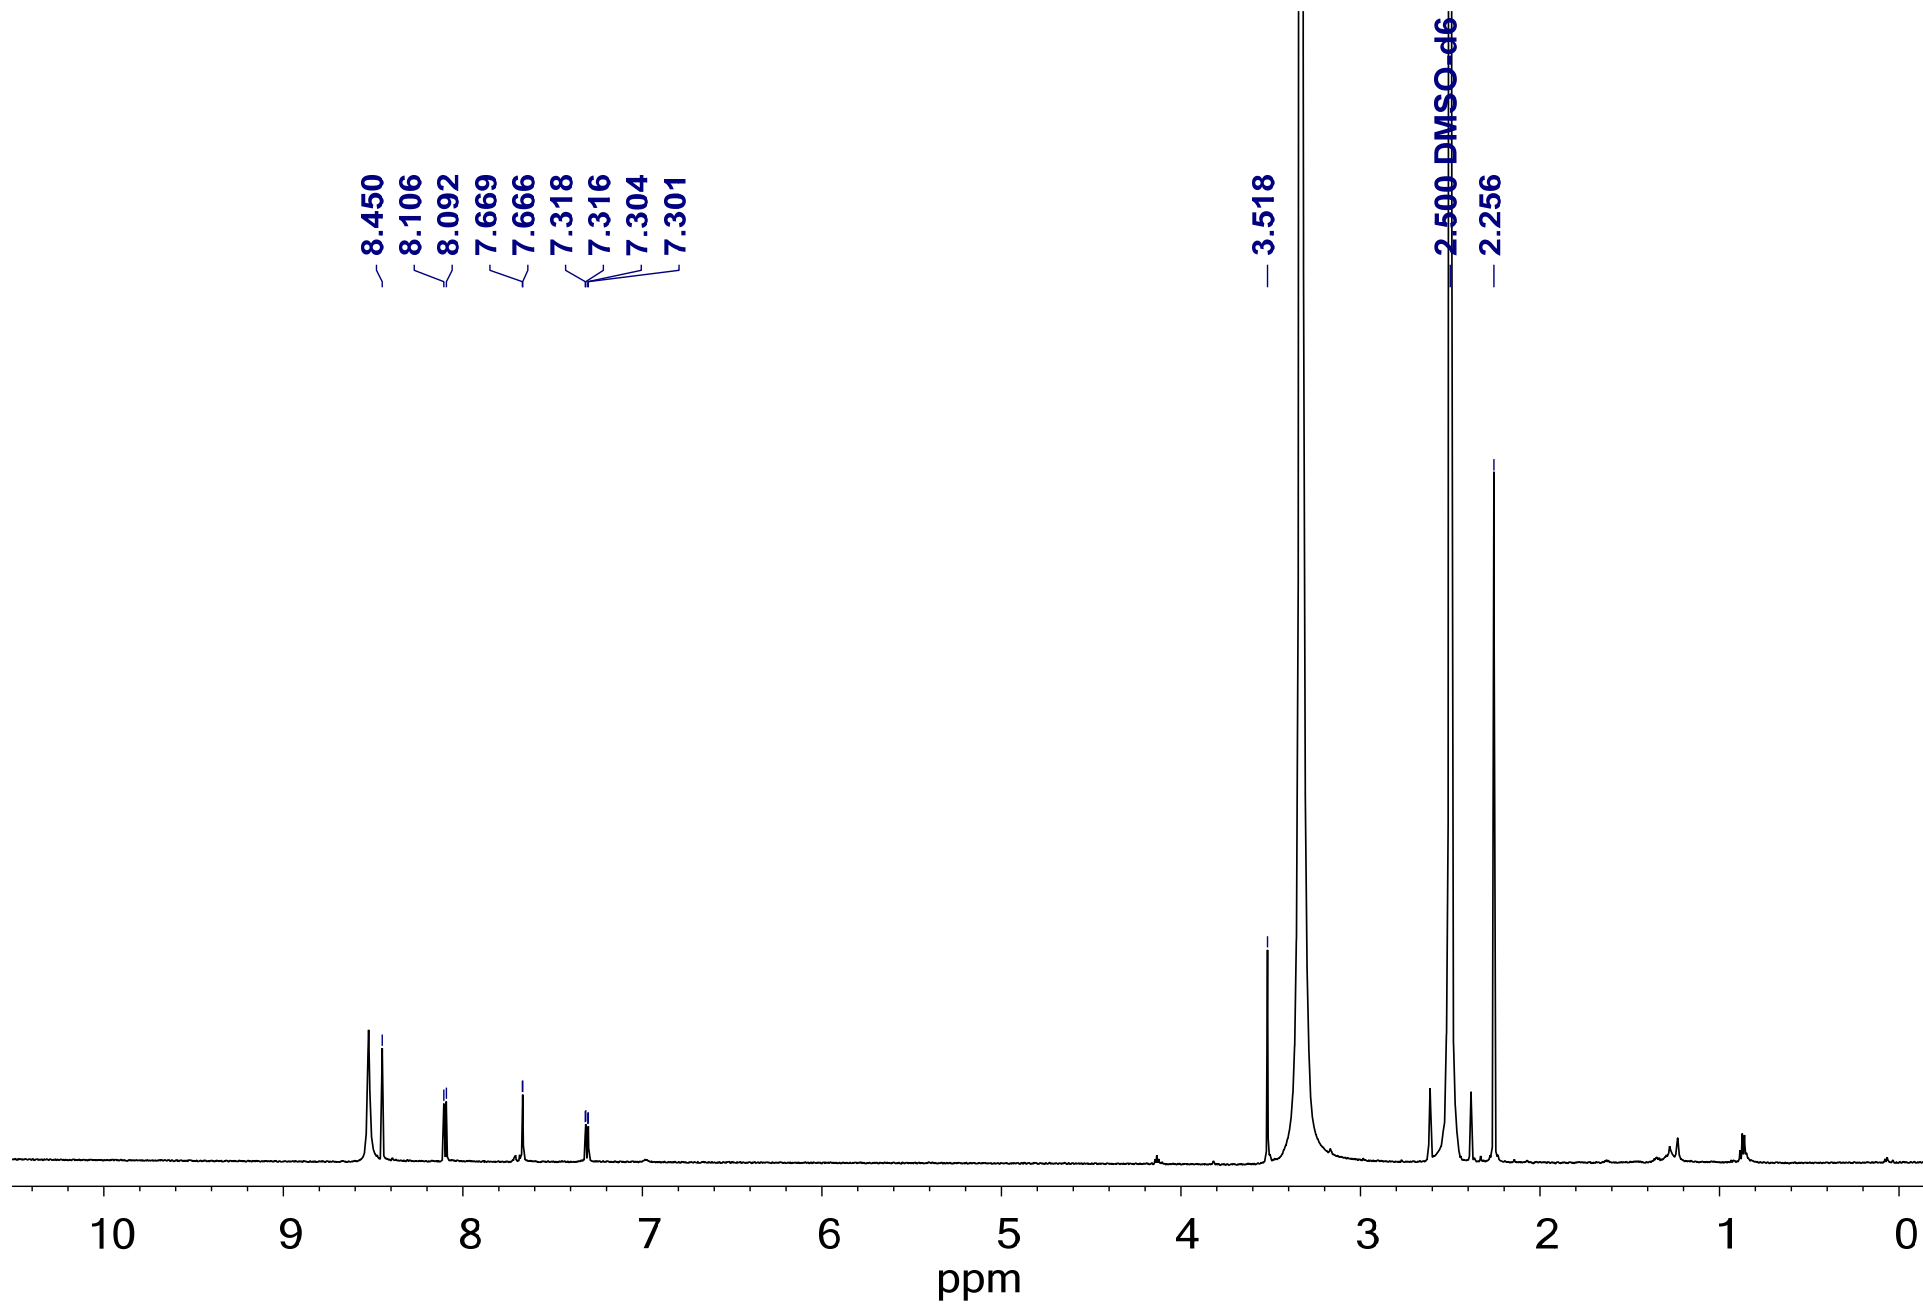

Figure S26. gHMBCAD spectrum (600 MHz) of 6-Br-8-keto-*N,N*-dimethyl-tryptamine (**14**) in DMSO-d<sub>6</sub>.

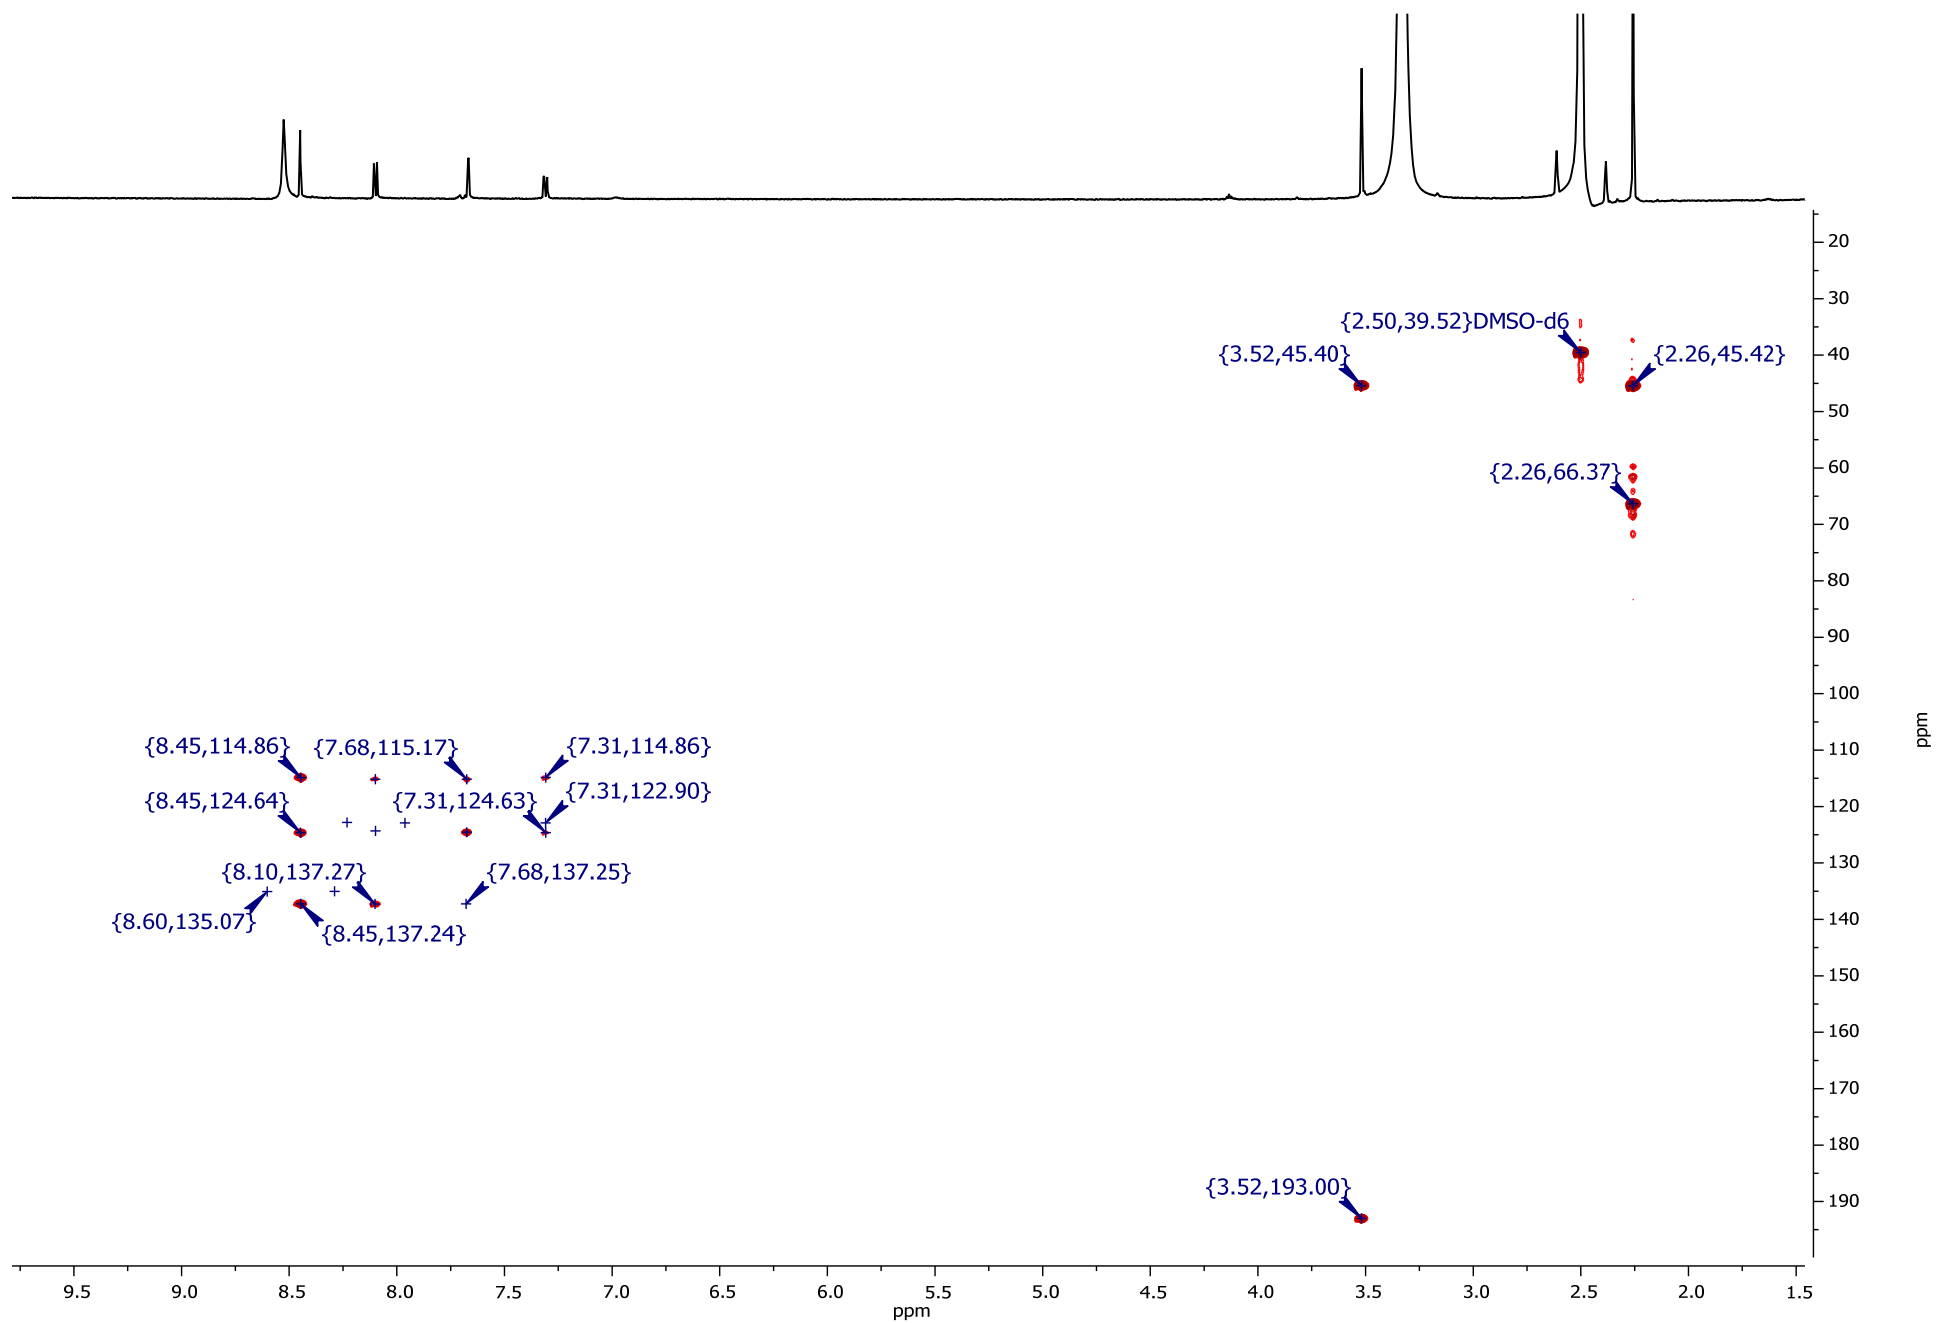

Figure S27. gHMBCAD spectrum (600 MHz) expansion of 6-Br-8-keto-*N,N*-dimethyl-tryptamine (**14**) in DMSO-*d*<sub>6</sub>.

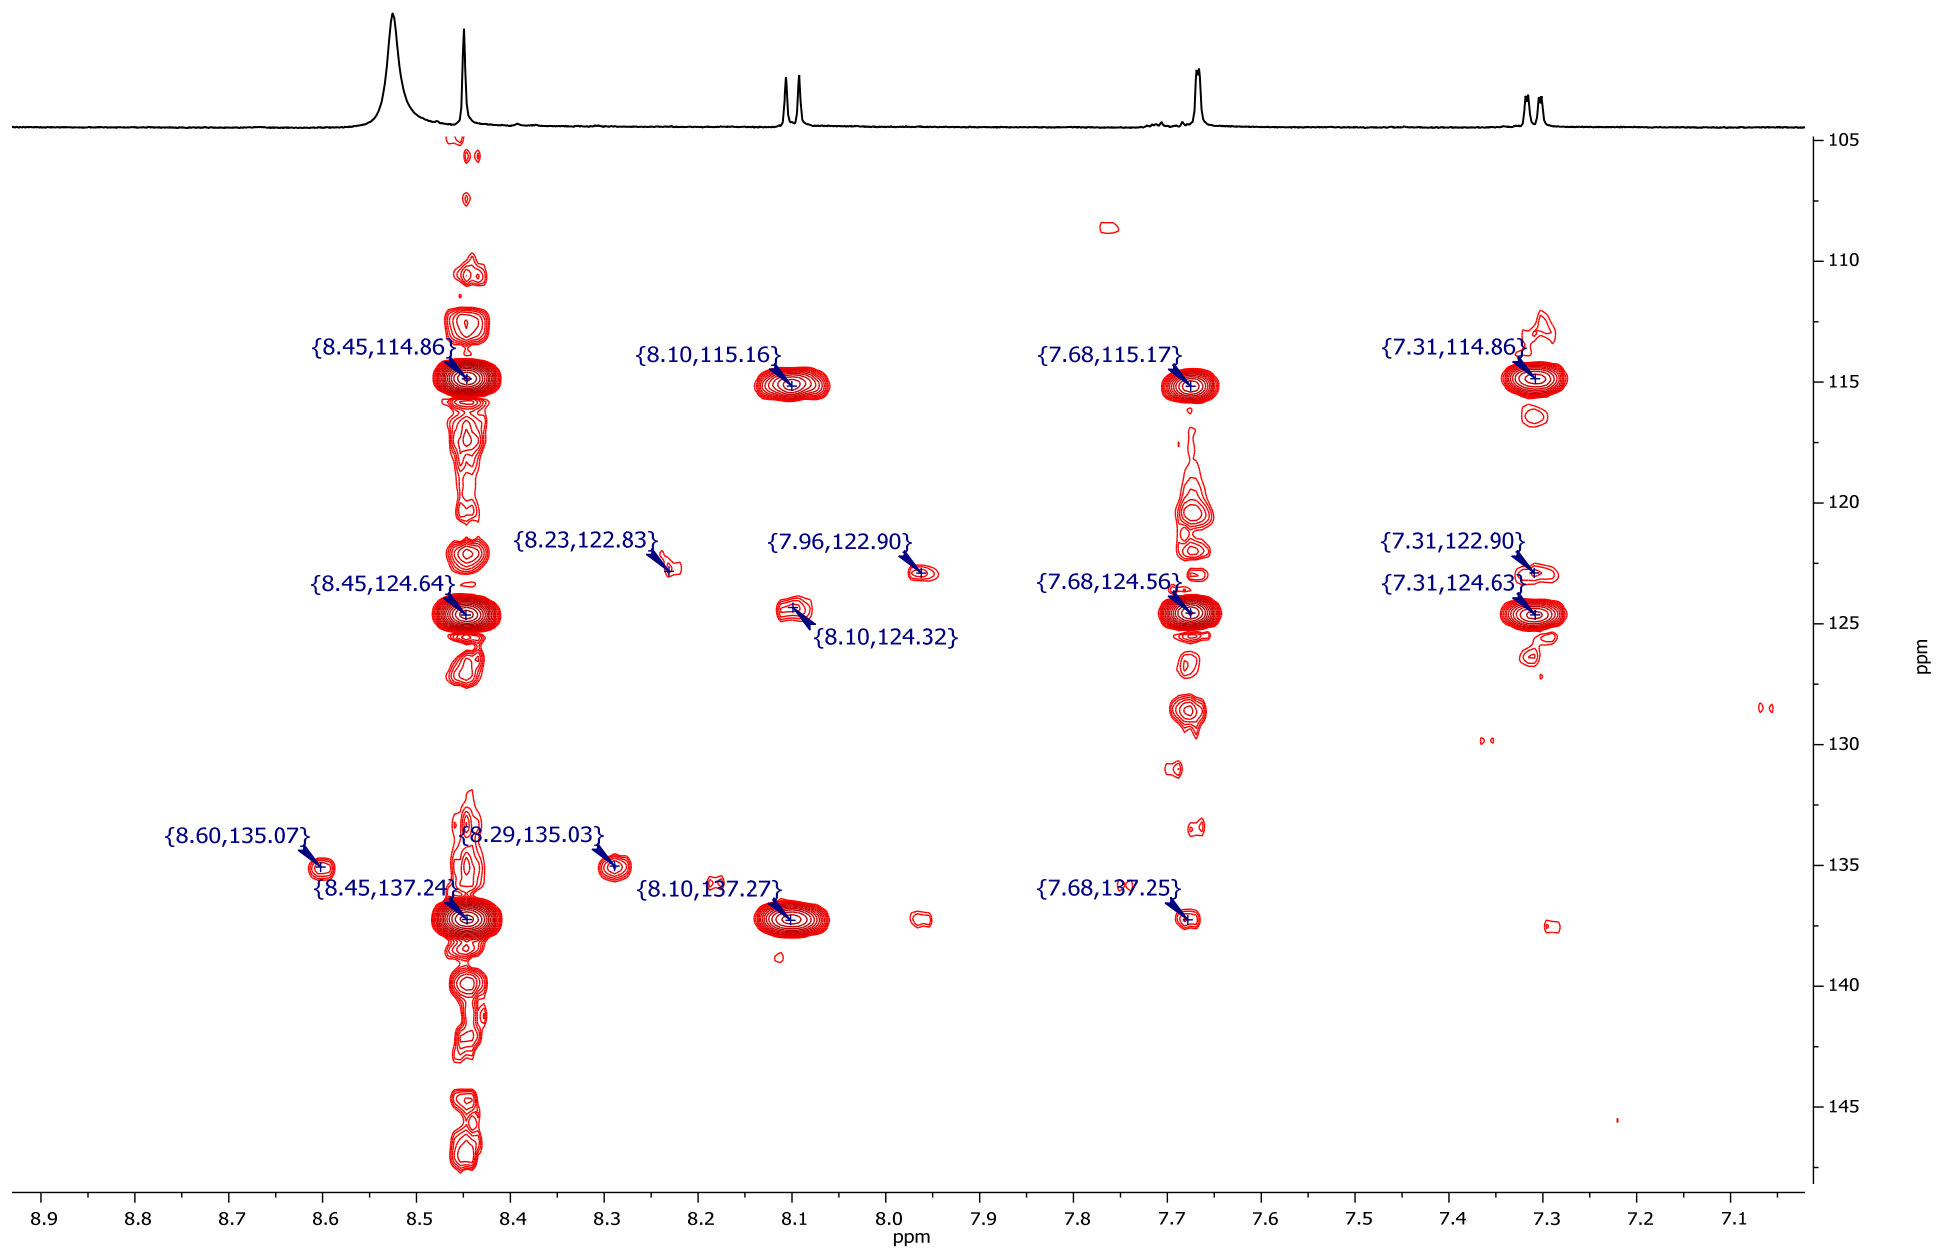

Figure S28. <sup>1</sup>H spectrum (600 MHz) of 5-Br-8-keto-*N,N*-dimethyl-tryptamine (**15**) in DMSO-d<sub>6</sub>.

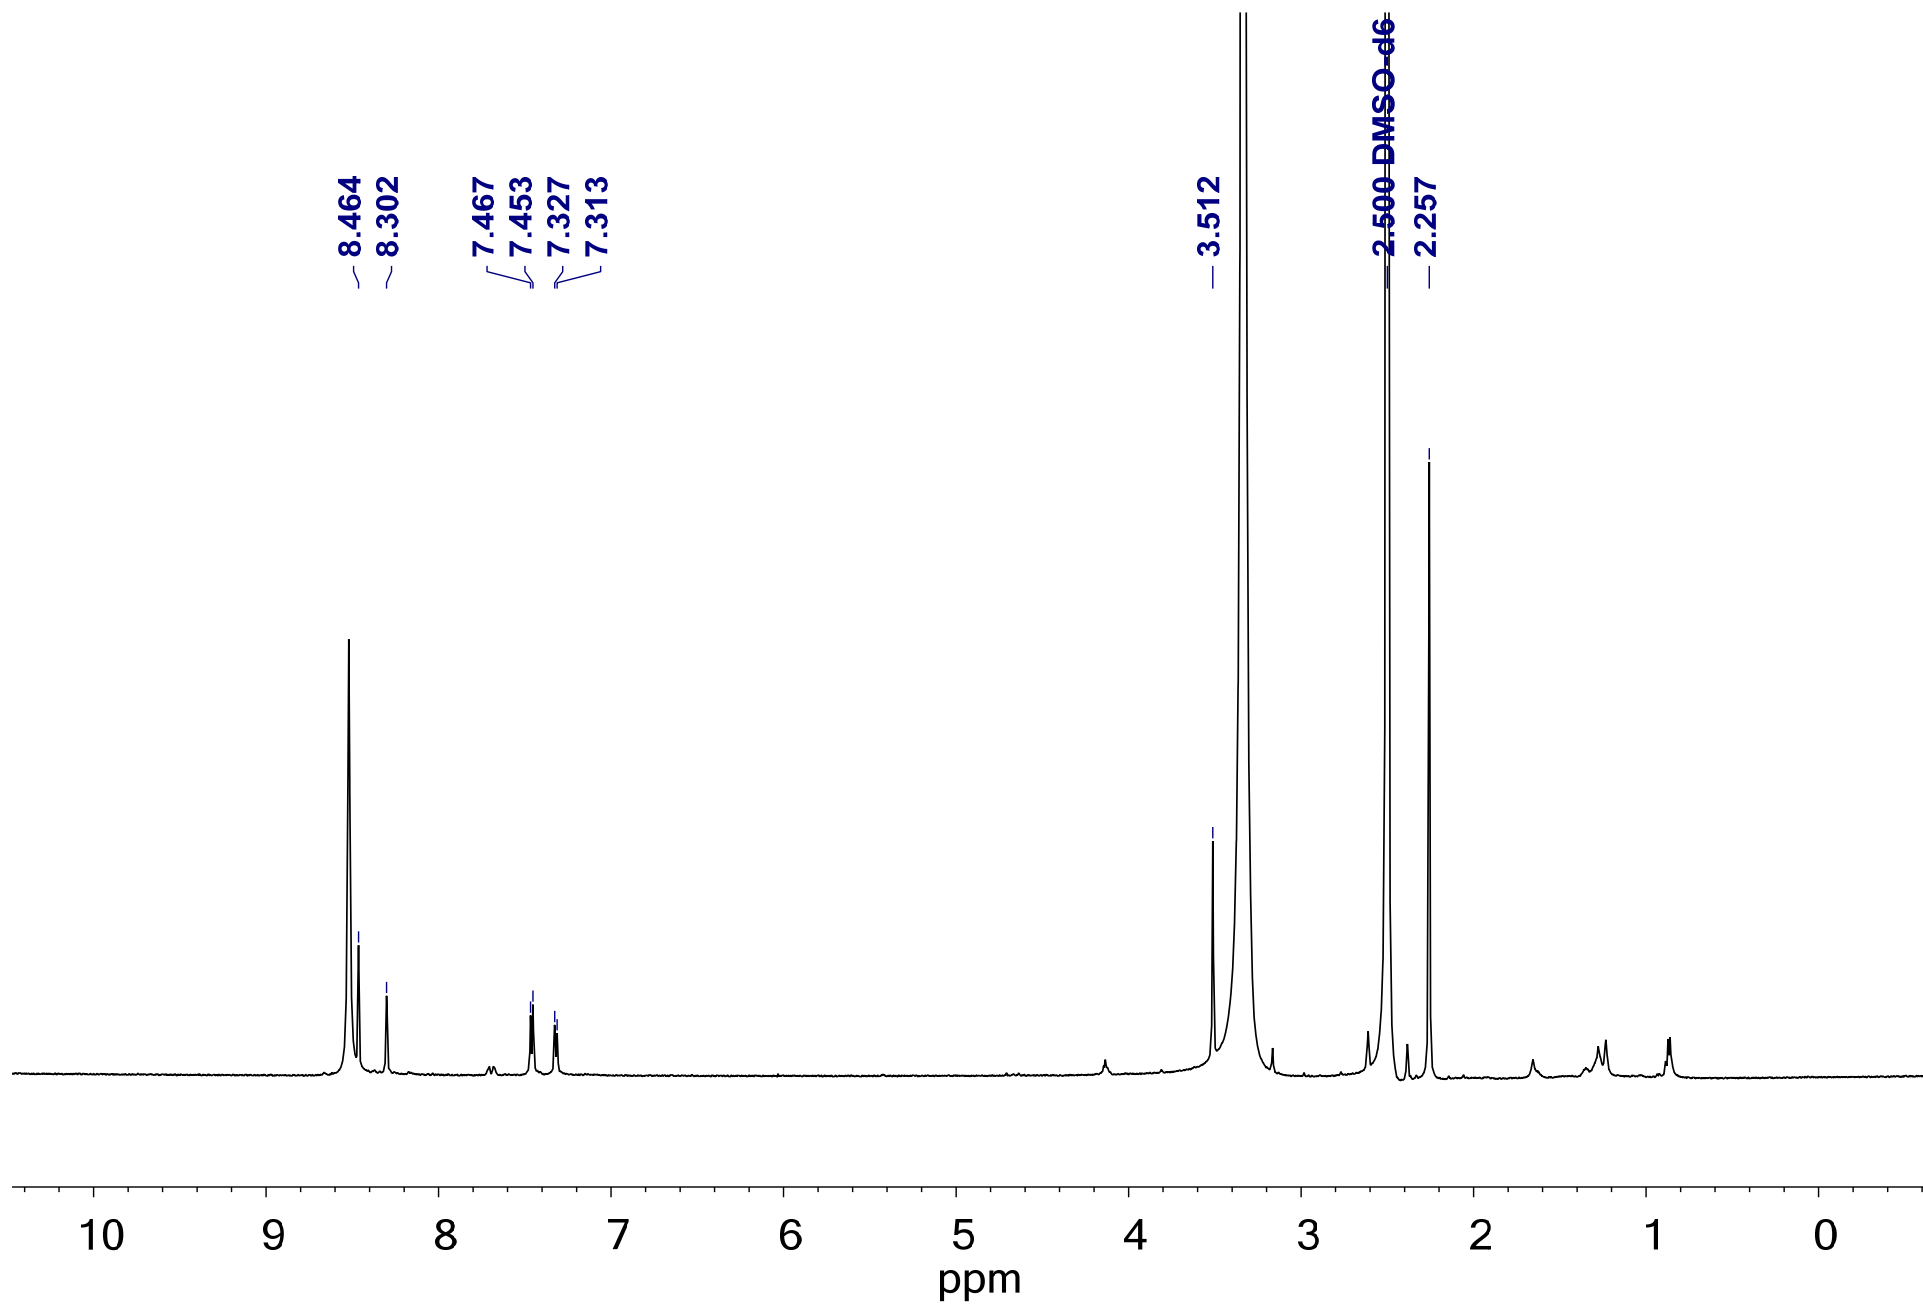

Figure S29. gHMBCAD spectrum (600 MHz) of 5-Br-8-keto-*N,N*-dimethyl-tryptamine (**15**) in DMSO-d<sub>6</sub>.

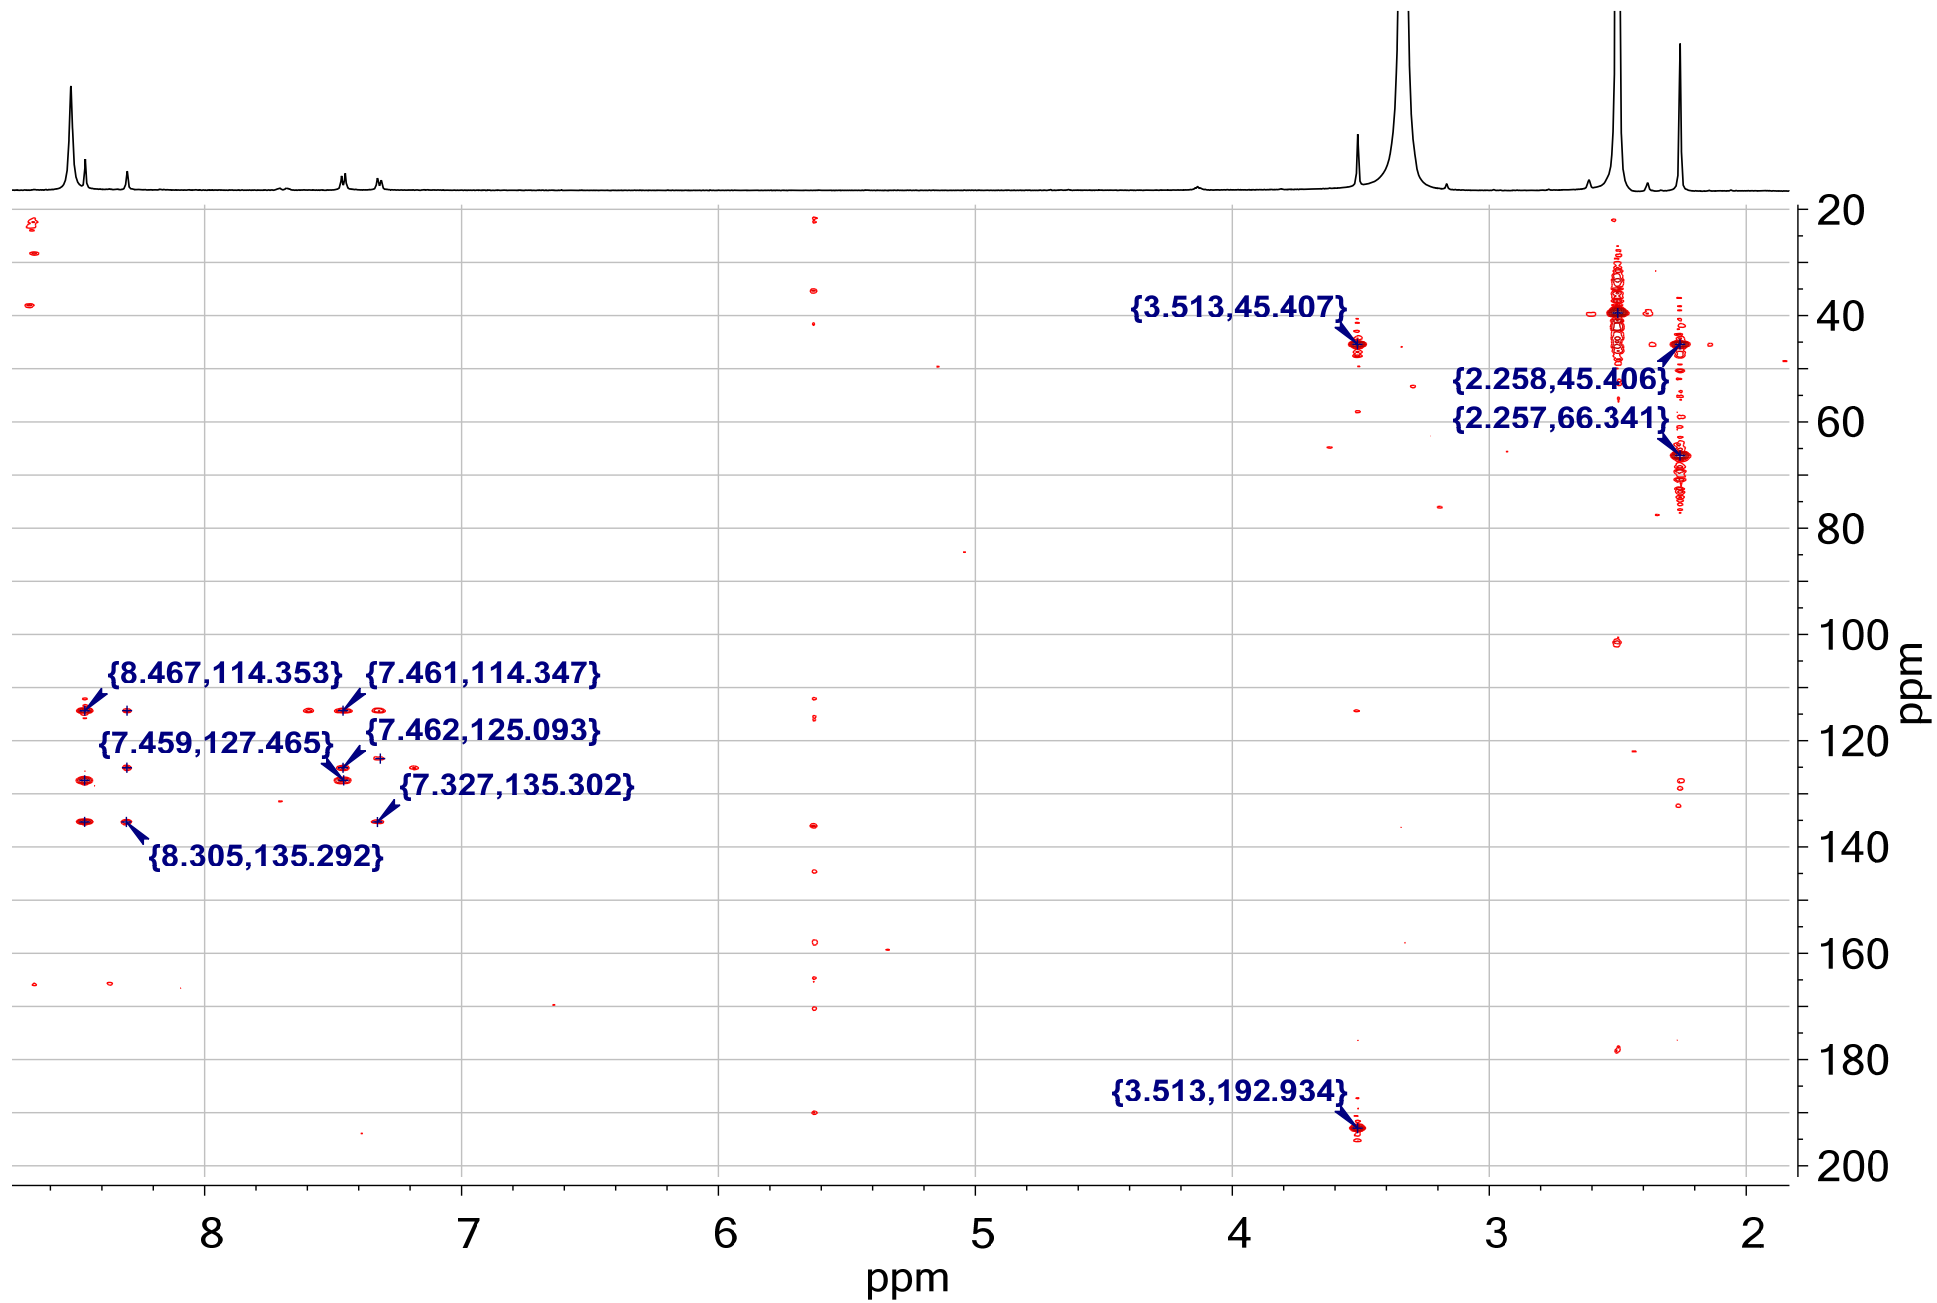

Figure S30. gHMBCAD spectrum (600 MHz) expansion of 5-Br-8-keto-*N,N*-dimethyl-tryptamine (**15**) in DMSO-*d*<sub>6</sub>.

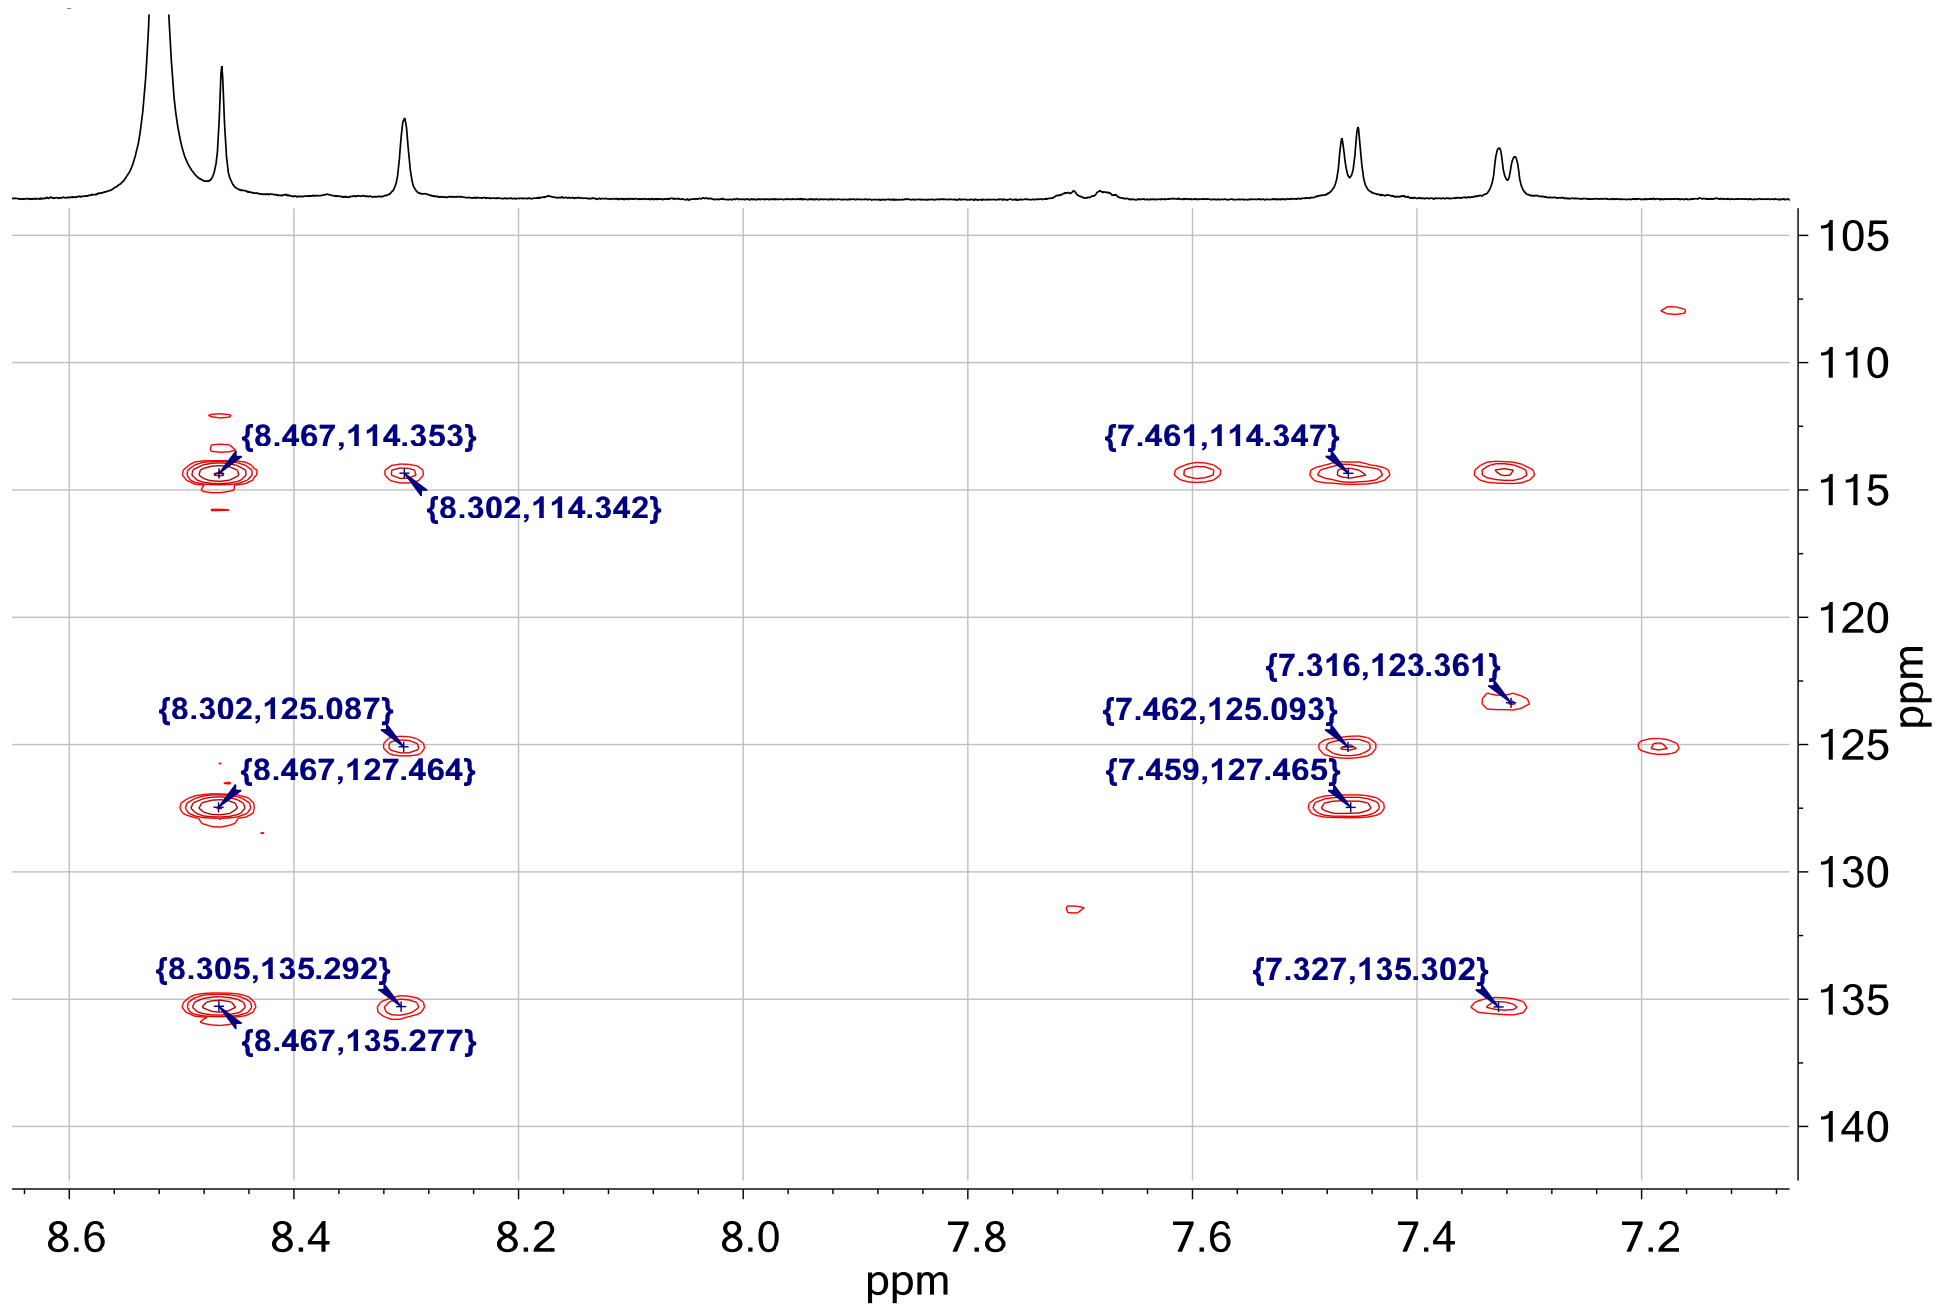



Figure S31.  $^1\text{H}$  spectrum (600 MHz) of 8-keto-*N,N*-dimethyl-tryptamine (**16**) in DMSO- $d_6$ .

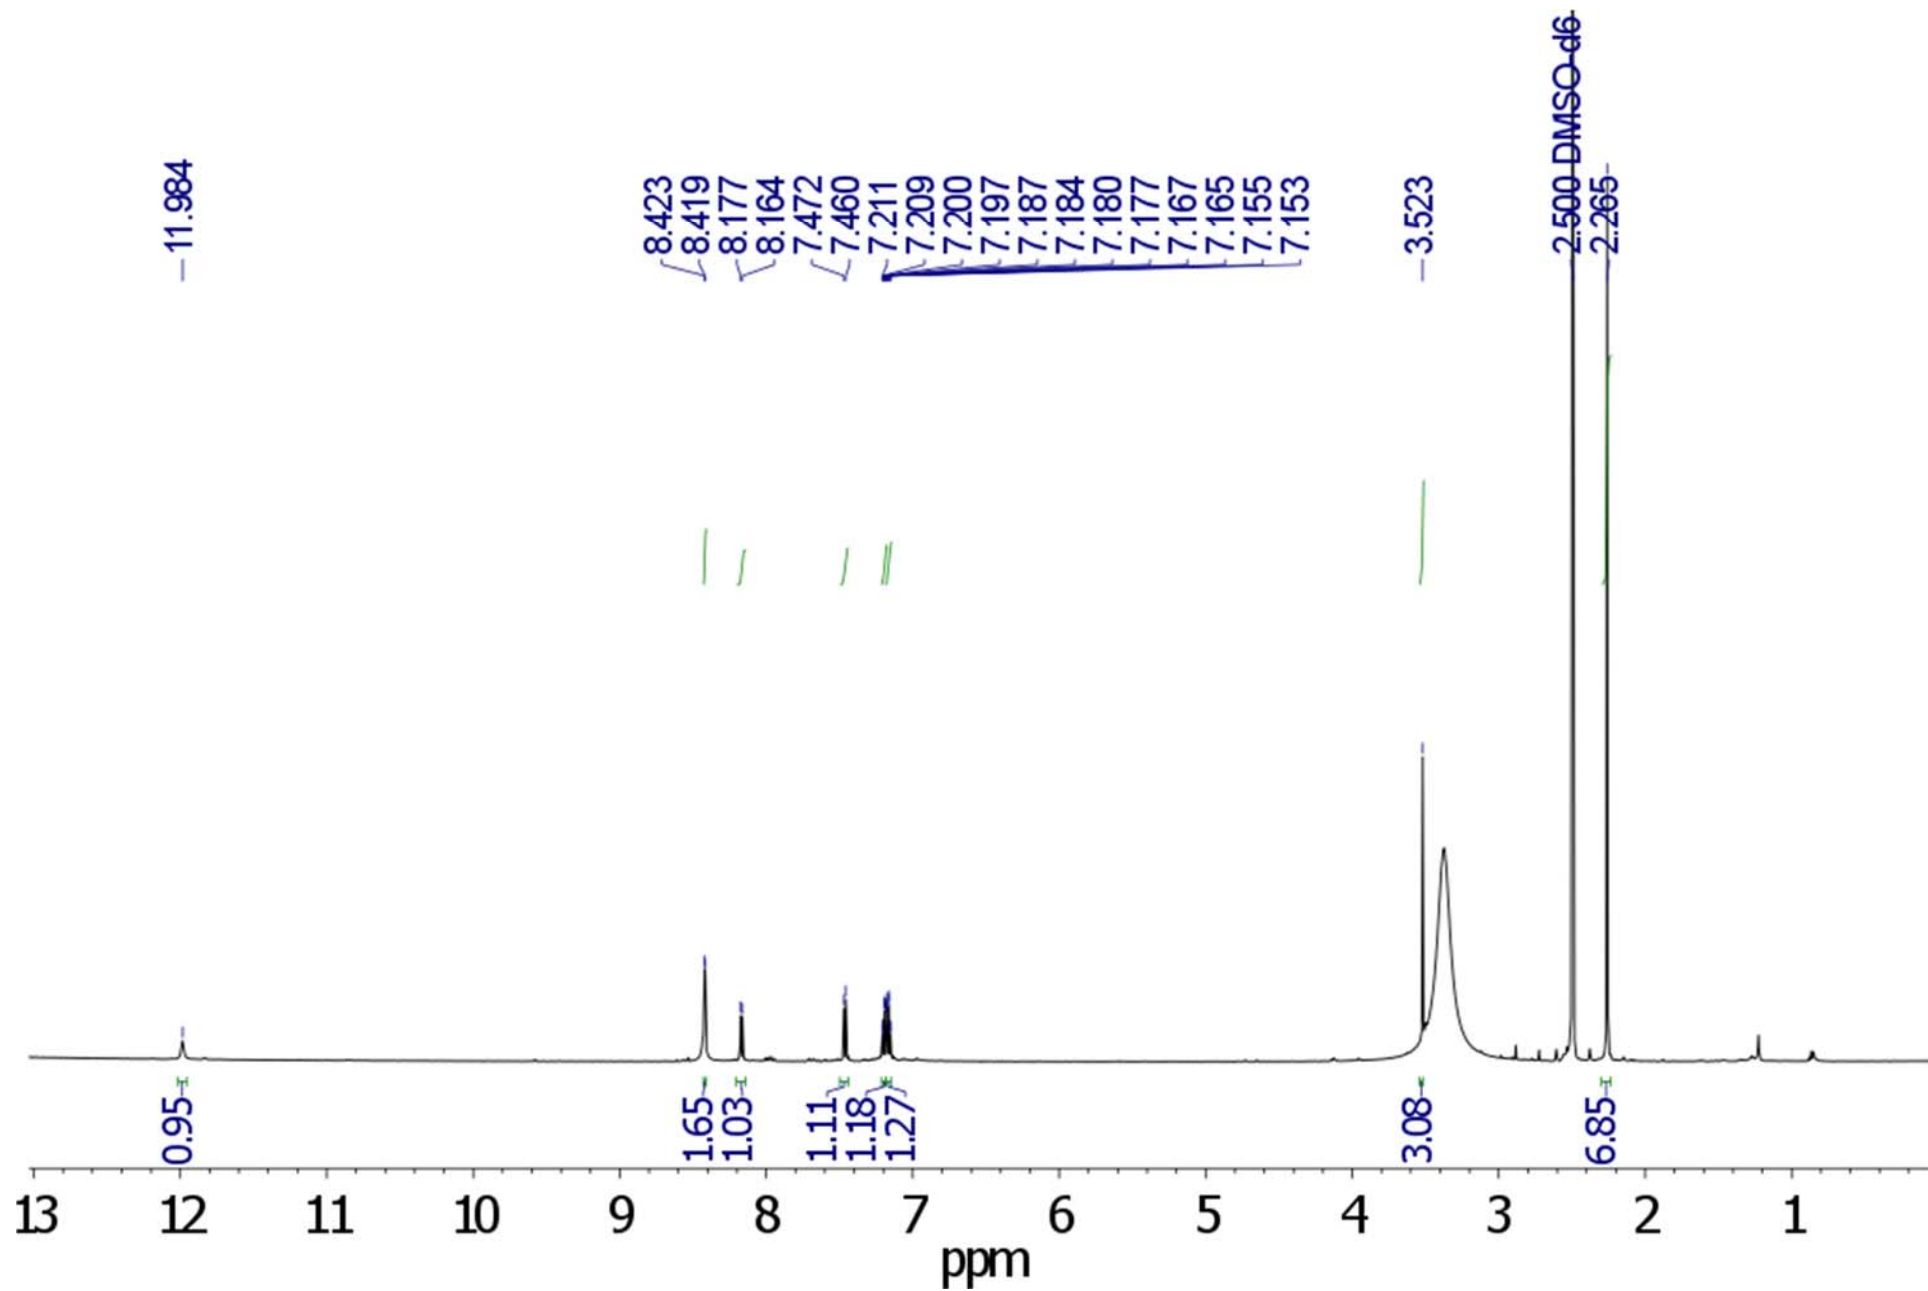

Figure S32. gHMBCAD spectrum (600 MHz) of 8-keto-*N,N*-dimethyl-tryptamine (**16**) in DMSO-d<sub>6</sub>.

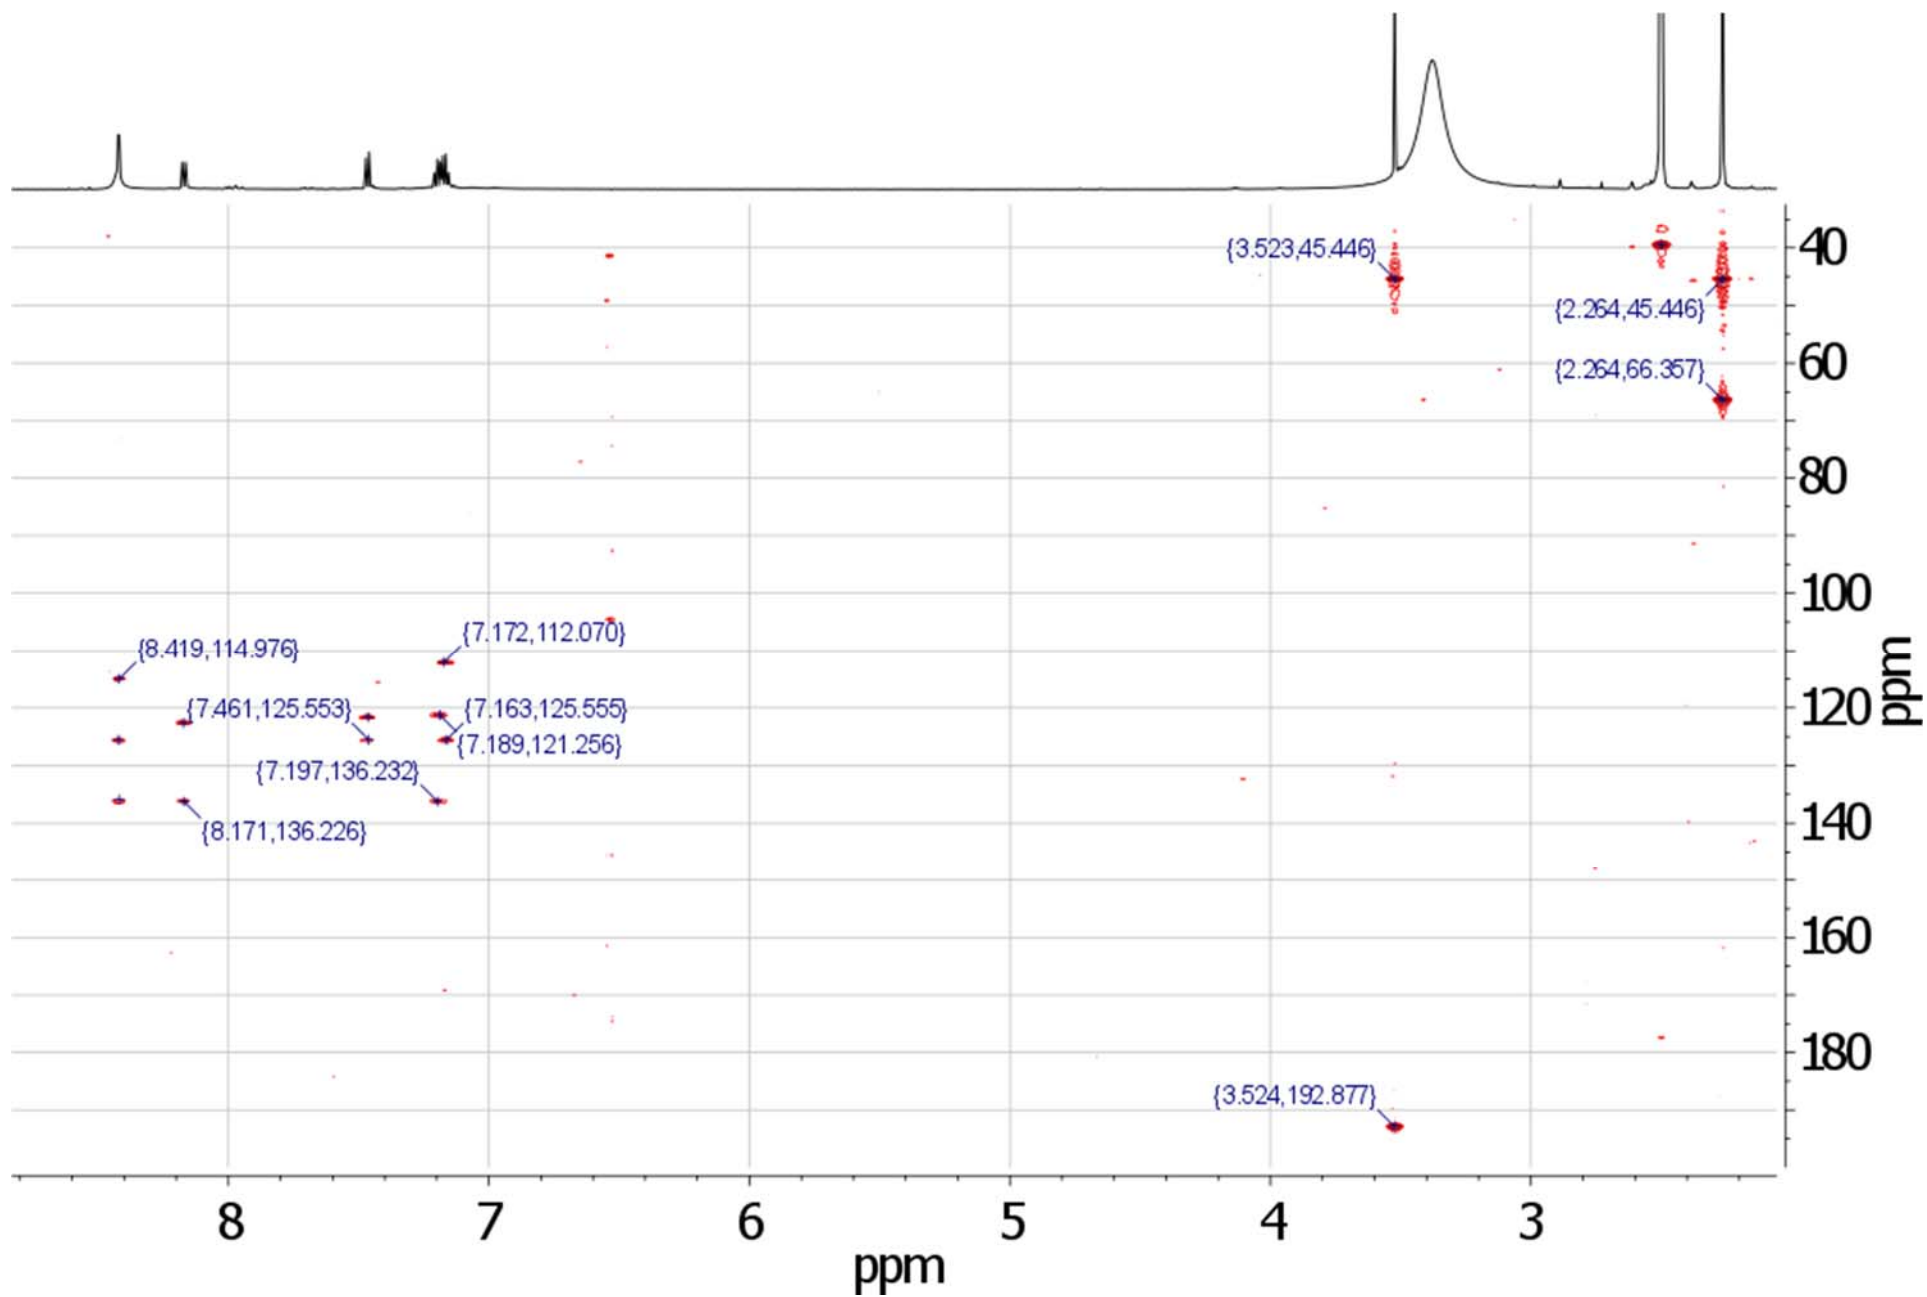

Figure S33. gHMBCAD spectrum expansion (600 MHz) of 8-keto-*N,N*-dimethyl-tryptamine (**16**) in DMSO-d<sub>6</sub>.

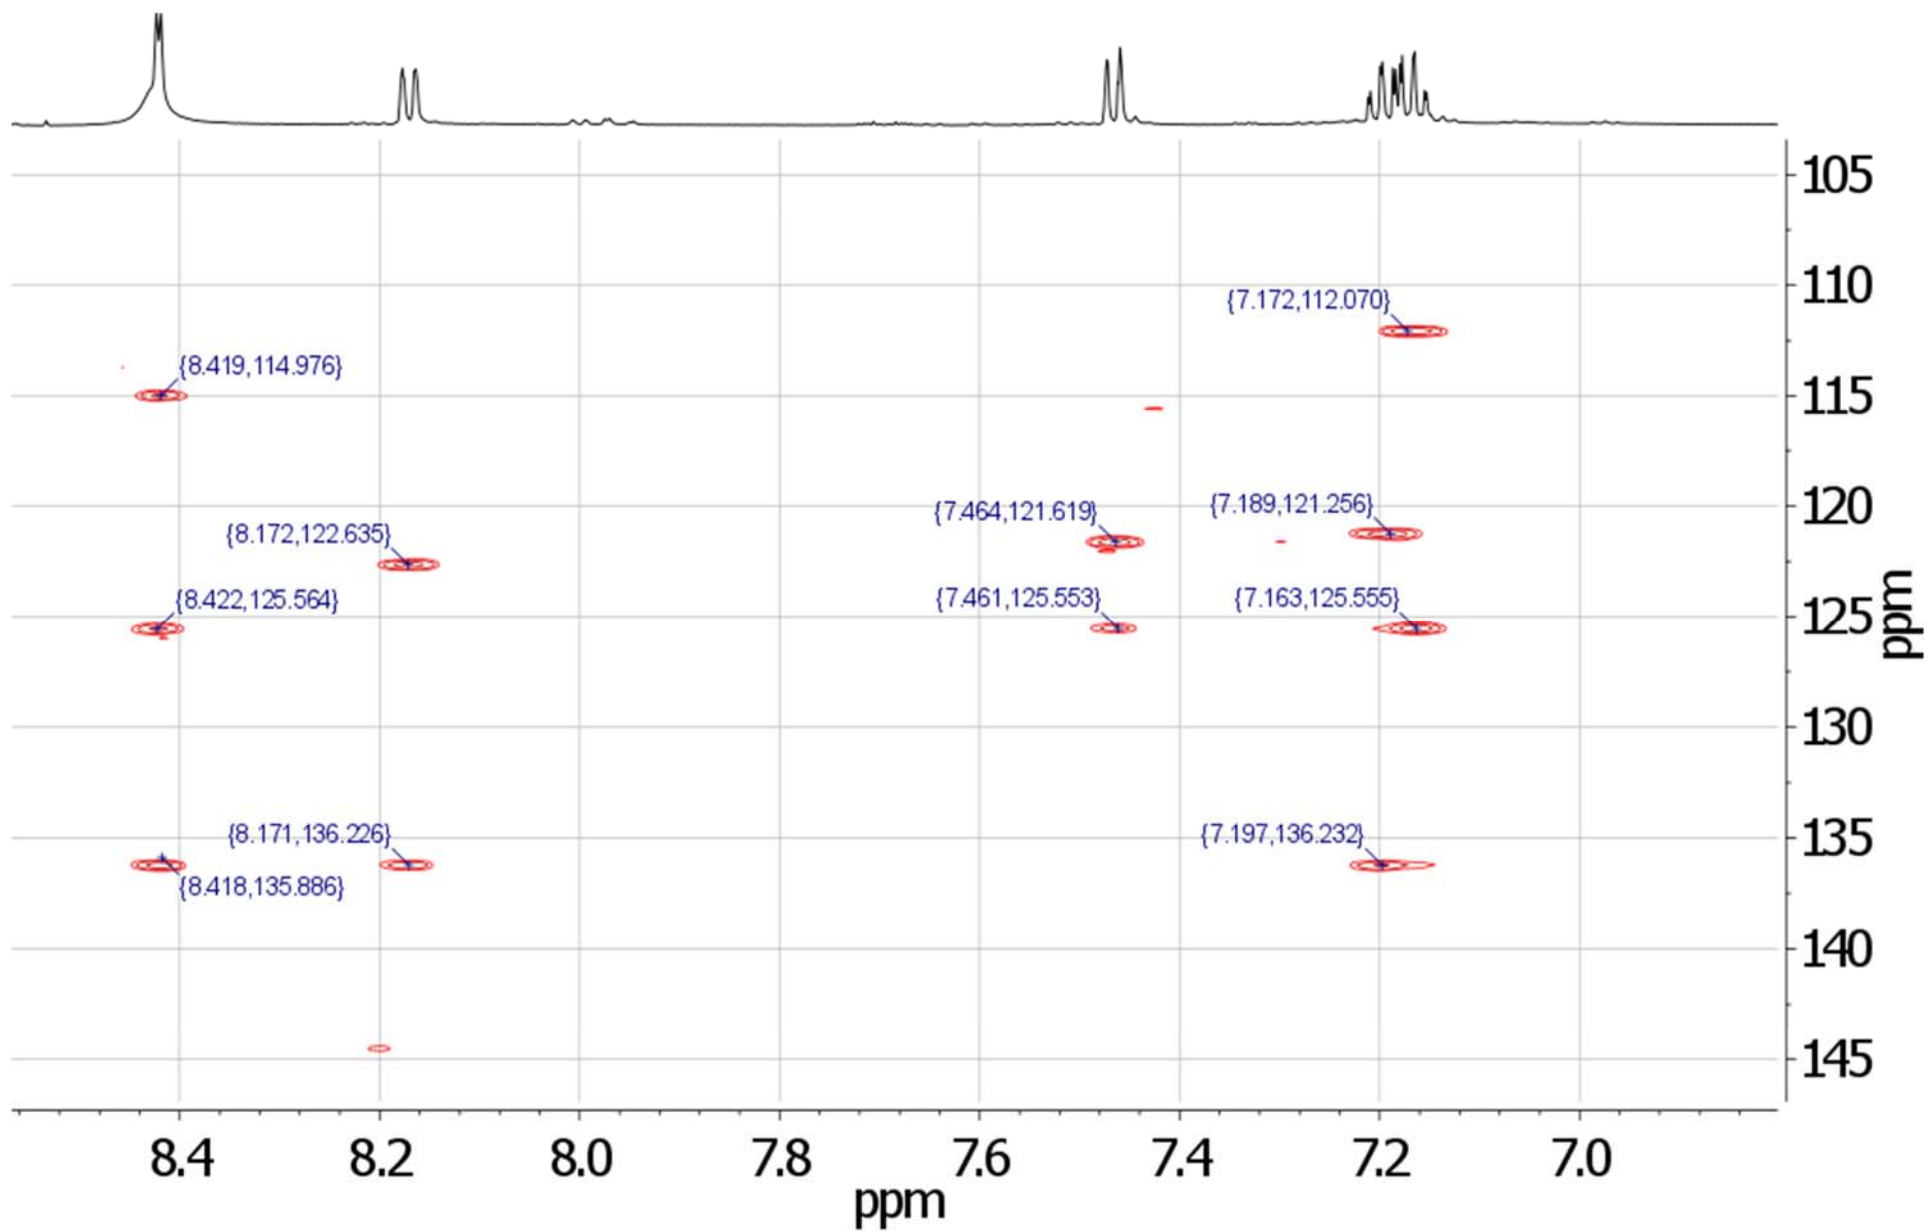

**Figure S34.**  $^1\text{H}$  spectrum (600 MHz) of 6-bromo-1H-indol-3-yl-carboxaldehyde (Tokyo Chemical Industry, Tokyo, Japan) (**5**) in DMSO-d<sub>6</sub>.

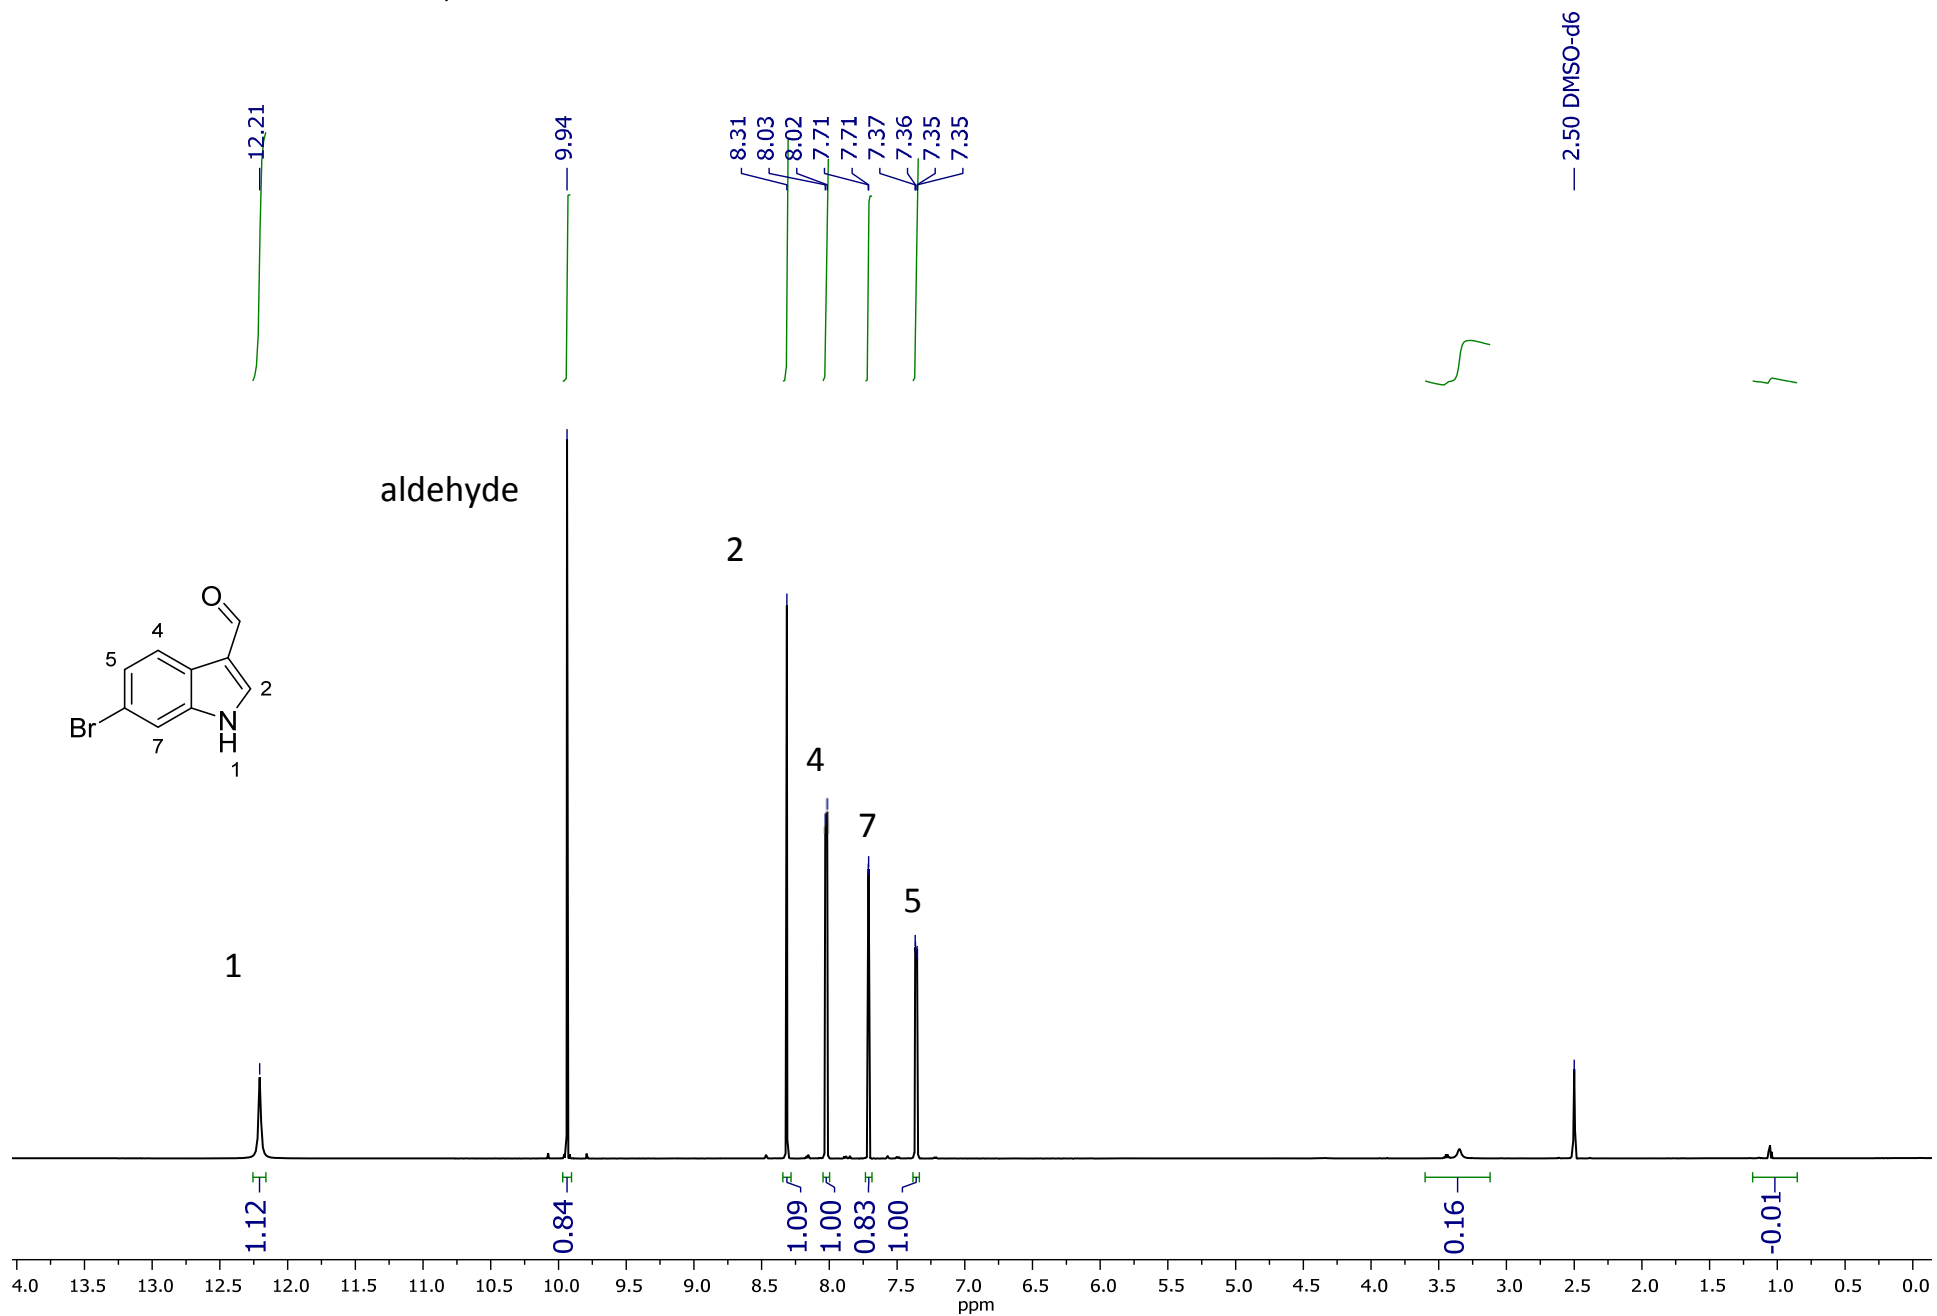

**Figure S35.**  $^1\text{H}$  spectrum expansion (600 MHz) of 6-bromo-1H-indol-3-yl-carboxaldehyde (Tokyo Chemical Industry, Tokyo, Japan) (**5**) in DMSO-d<sub>6</sub>.

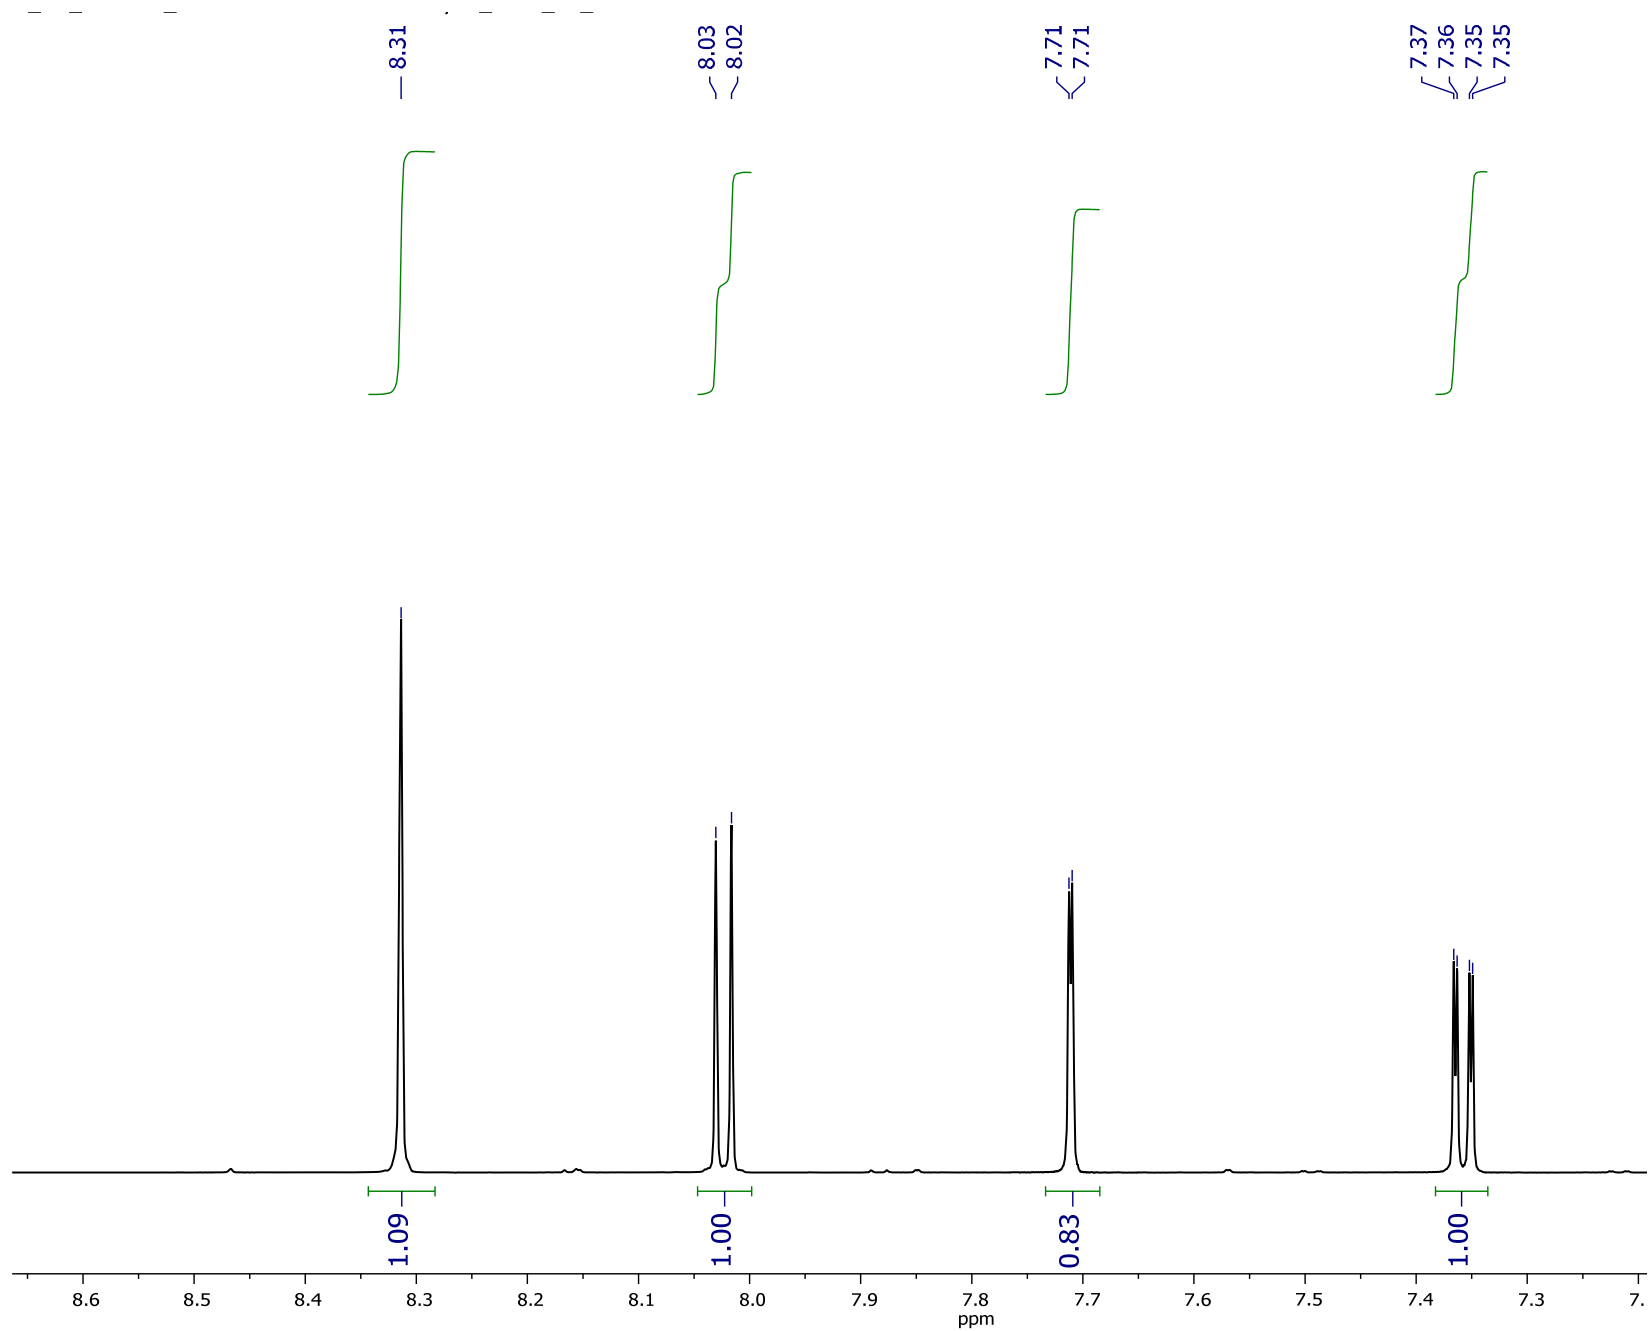

Figure S36.  $^{13}\text{C}$  spectrum (150 MHz) of 6-bromo-1H-indol-3-yl-carboxaldehyde (Tokyo Chemical Industry, Tokyo, Japan) (5) in DMSO-d<sub>6</sub>.

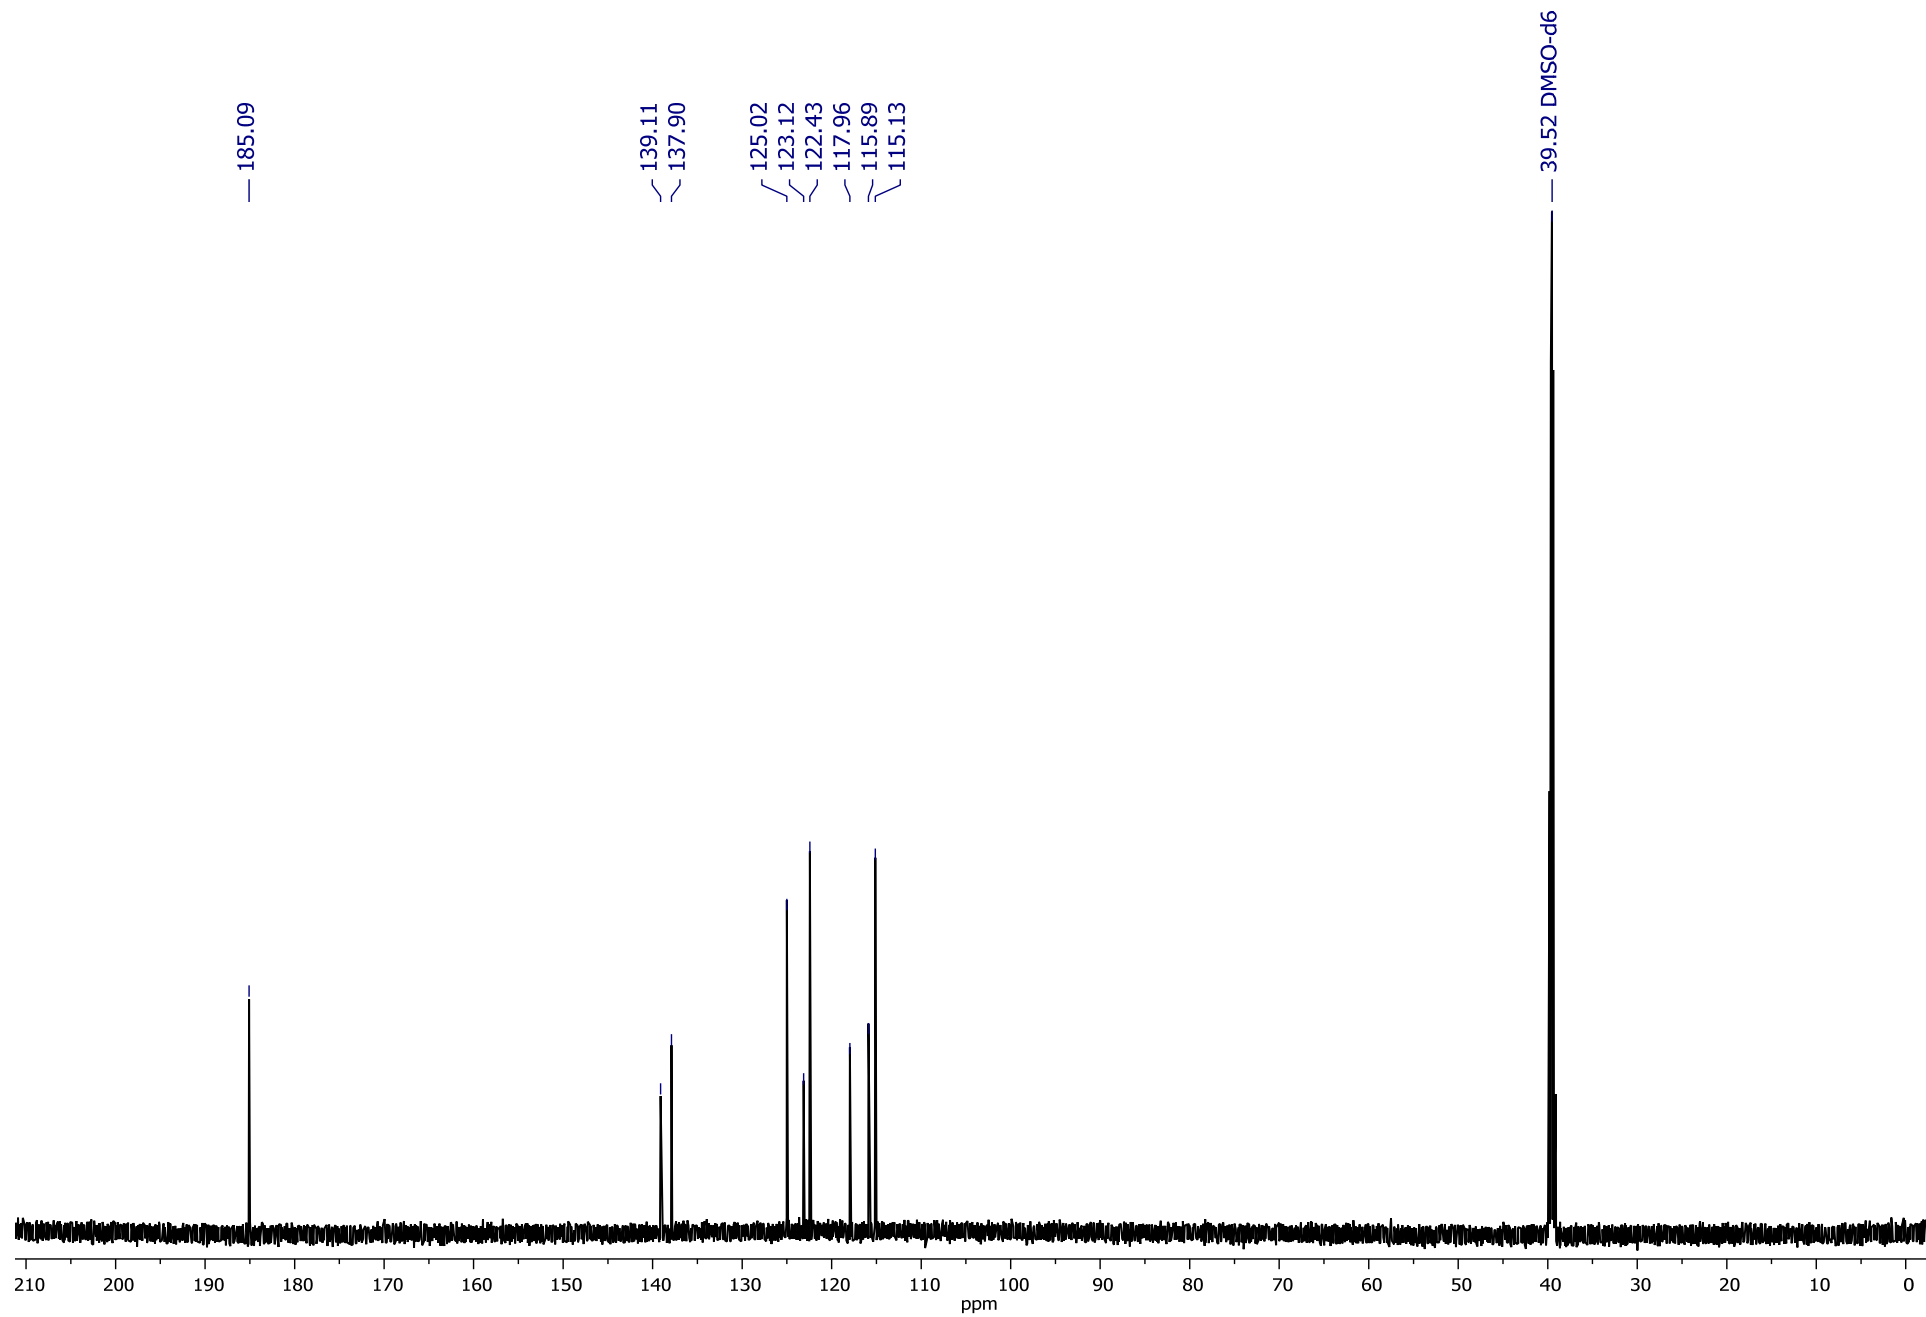

Figure S37. gHSQCAD spectrum (600 MHz) of 6-bromo-1H-indol-3-yl-carboxaldehyde (Tokyo Chemical Industry, Tokyo, Japan) (5) in DMSO-d6.

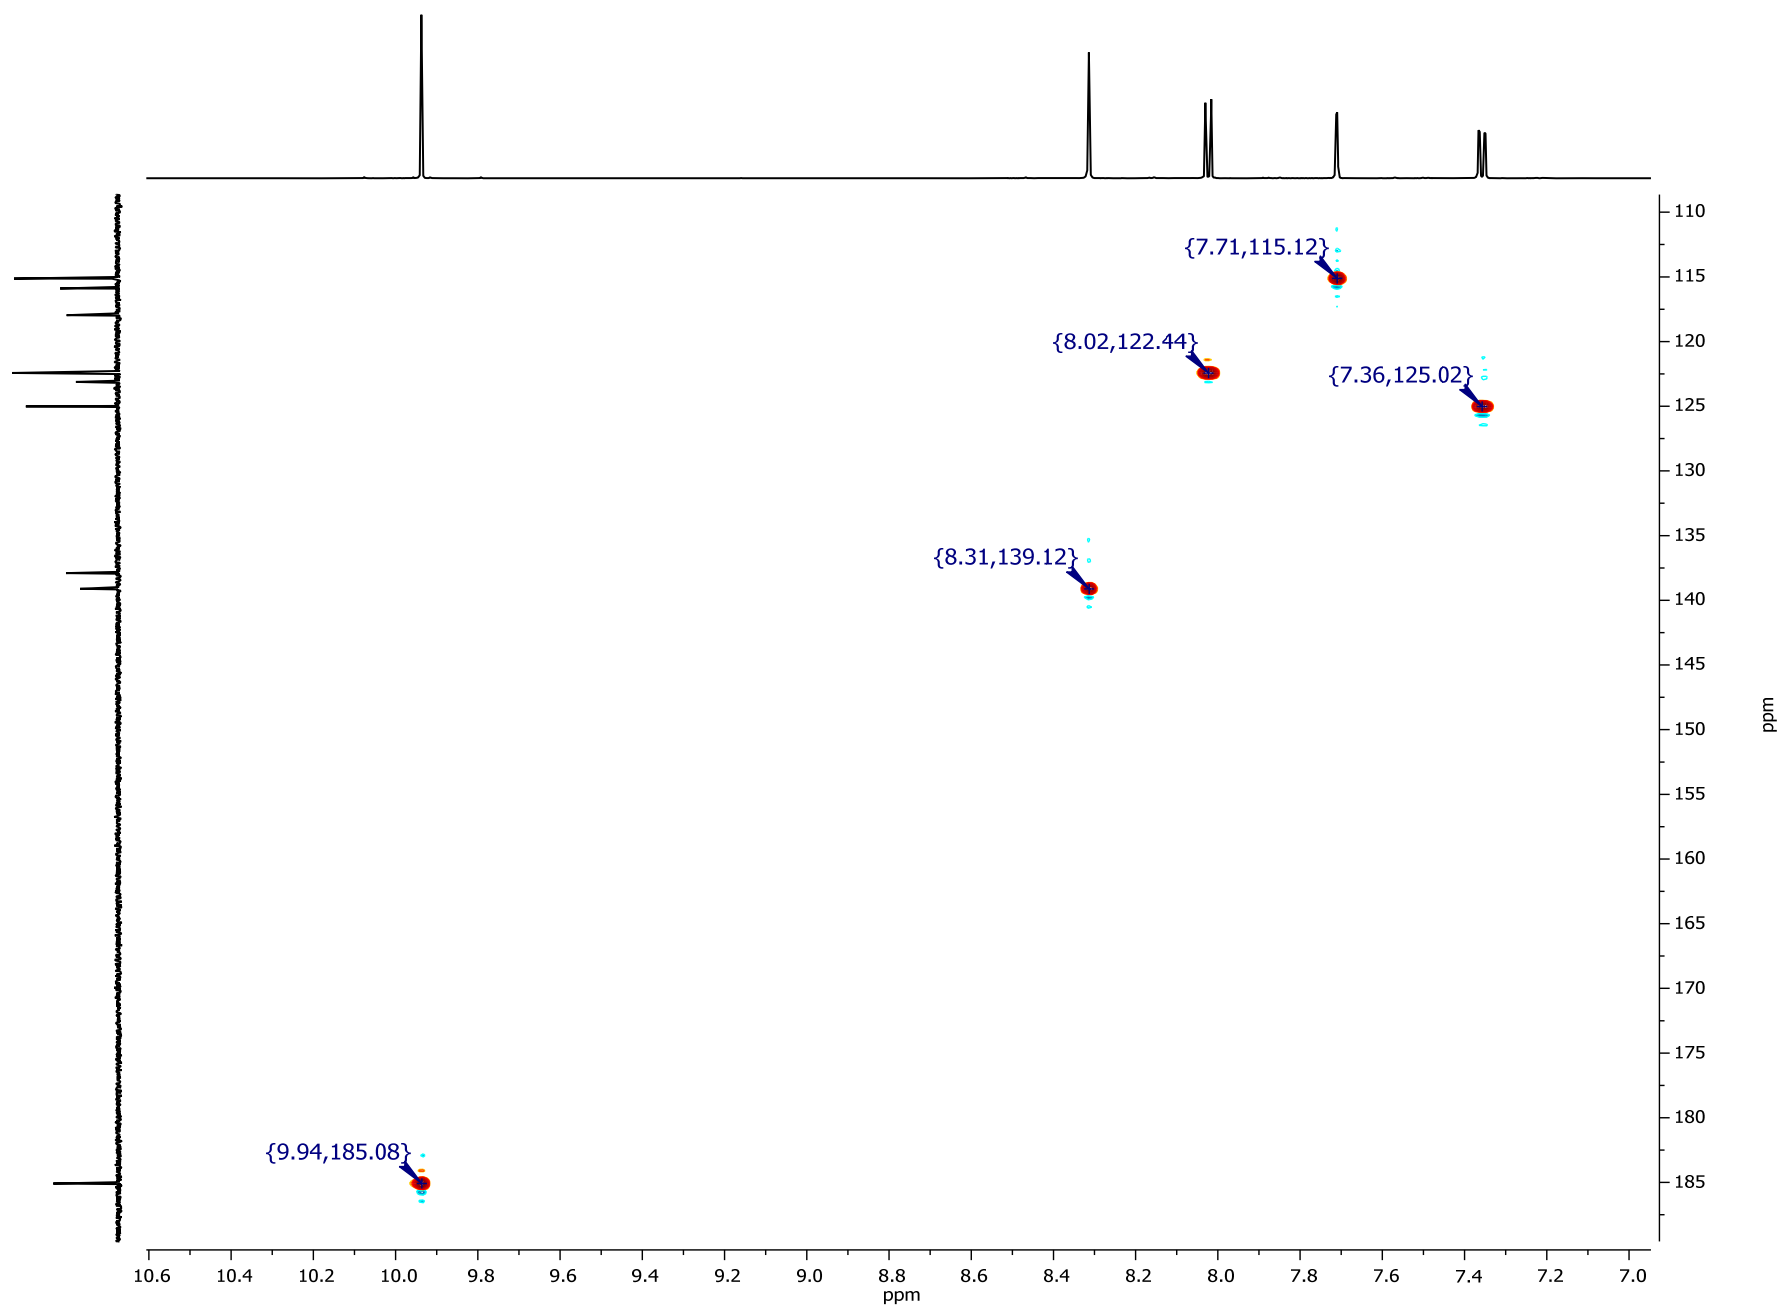

**Figure S38.** NOESY spectrum (600 MHz, 600ms mixing time) of 6-bromo-1H-indol-3-yl-carboxaldehyde (Tokyo Chemical Industry, Tokyo, Japan) (**5**) in DMSO-d<sub>6</sub>.

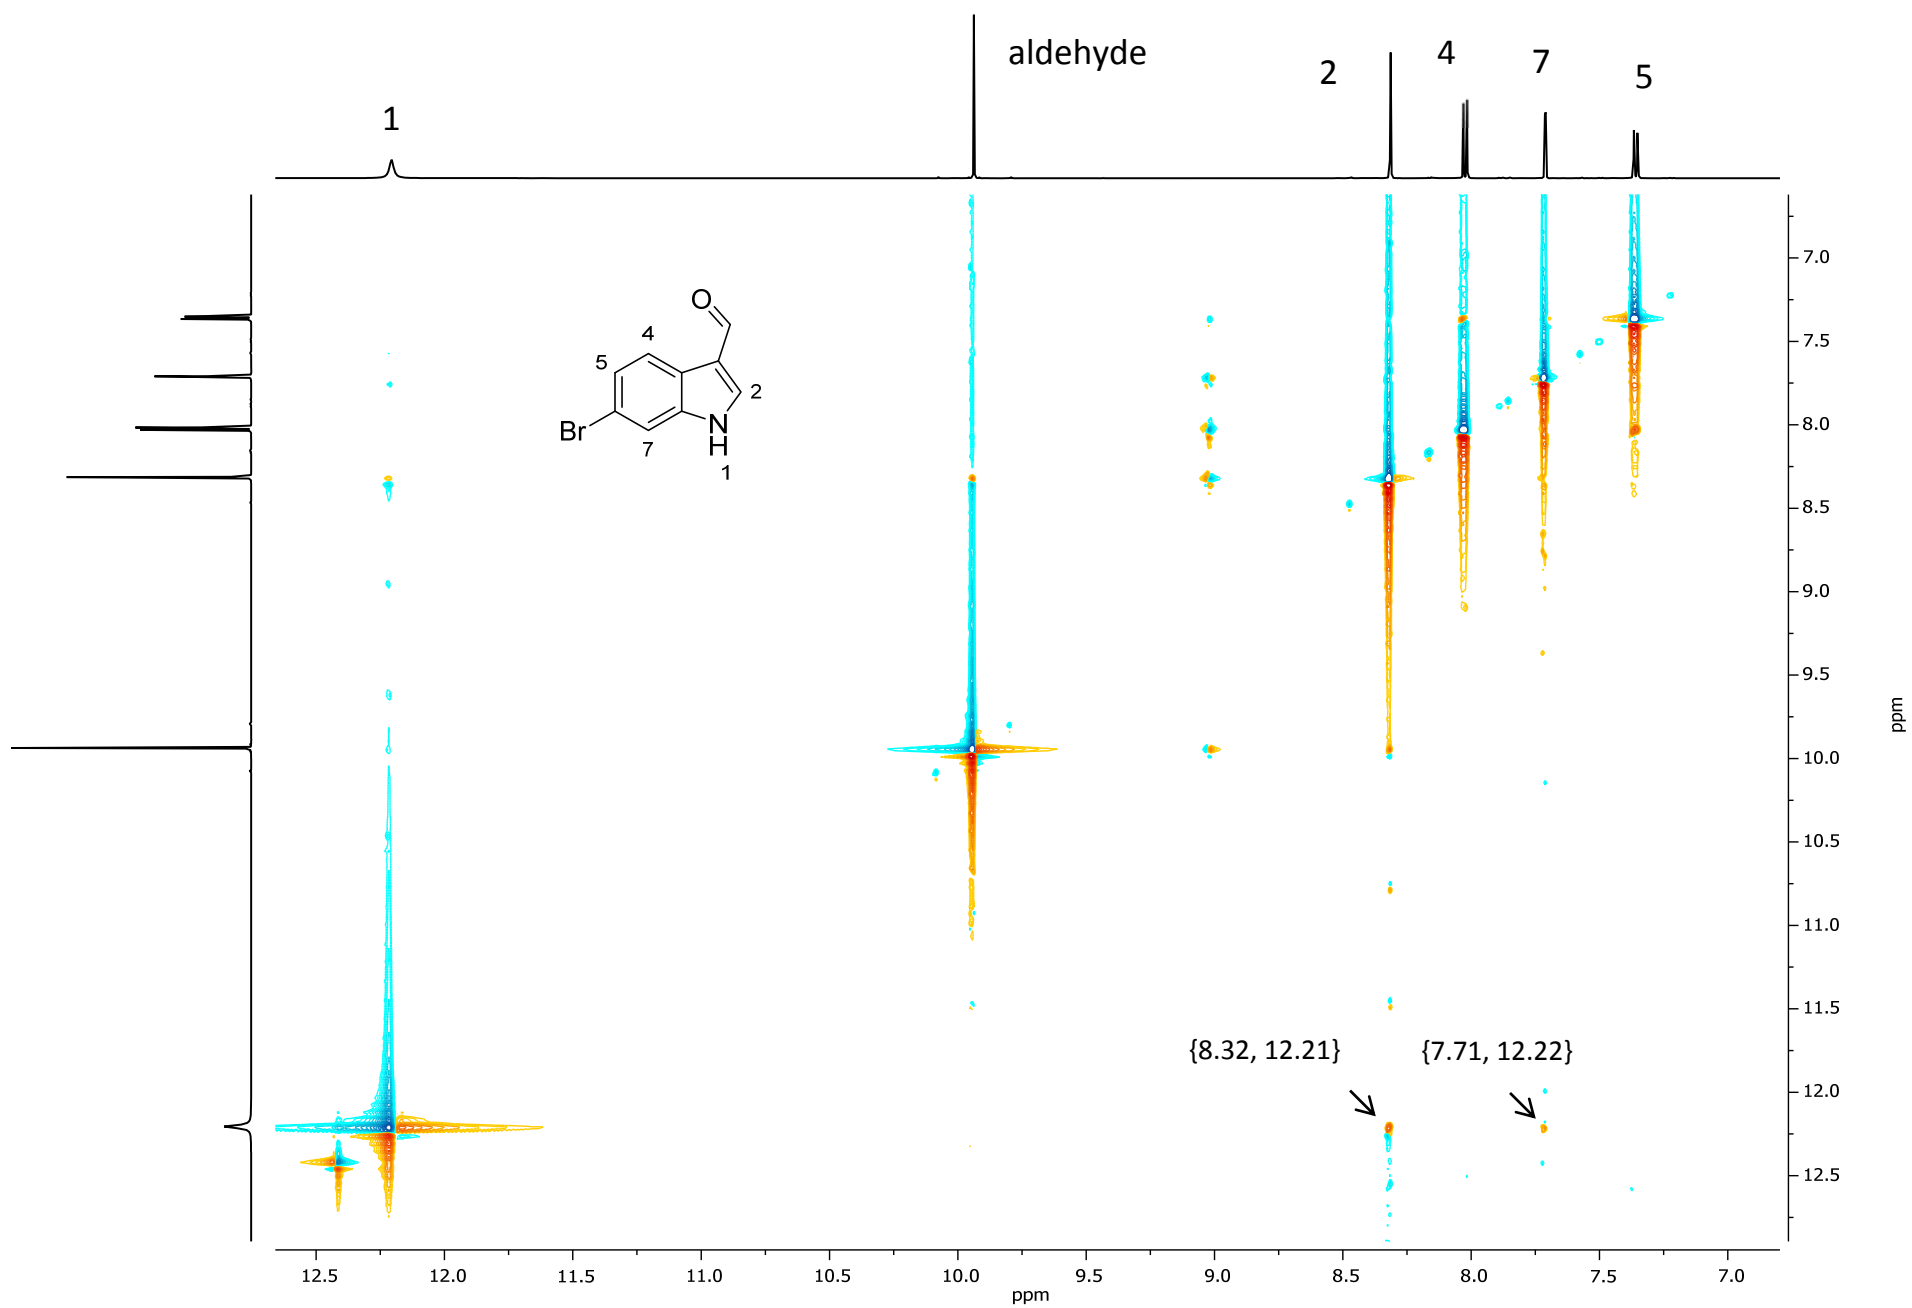

Supplement: NIHMS922610-supplement.pdf [file NIHMS922610-supplement.pdf]
